# Supplementary material for: Facile synthesis of nitroamino-1,3,4-oxadiazole with azo linkage: a new family of high-performance and biosafe energetic materials
Source: Royal Society of Chemistry journal article supplement (doi:10.1039/d2ta07372b), 2022-01-01
Supplement: d2ta07372b1.pdf [file d2ta07372b1.pdf]

## Supporting Information

### Facile synthesis of nitroamino-1,3,4-oxadiazole with azo linkage: a new family of high-performance and biosafe energetic materials

Shreyasi Banik,<sup>a†</sup> Pradeep Kumar,<sup>a†</sup> Vikas D. Ghule,<sup>b</sup> Shweta Khanna,<sup>c</sup> Dharmaraja Allimuthu,<sup>c</sup> and Srinivas Dharavath<sup>\*a</sup>

a. Energetic Materials Laboratory, Department of Chemistry, Indian Institute of Technology Kanpur, Kanpur-208016, Uttar Pradesh, India. E-mail: srinivasd@iitk.ac.in

b. Department of Chemistry, National Institute of Technology Kurukshetra, Kurukshetra-136119, Haryana, India.

c. Chemical Biology Laboratory, Department of Chemistry, Indian Institute of Technology Kanpur, Kanpur-208016, Uttar Pradesh, India.

#### Table of Contents

| Entry                                                                        | Page No |
|------------------------------------------------------------------------------|---------|
| General Methods and plausible synthetic mechanism of <b>5</b>                | 2-9     |
| Crystal Structure Analysis for <b>4</b> , <b>5</b> and <b>9</b>              | 9-27    |
| Resazurin-based cell viability assay for compounds.                          | 28      |
| NMR, Mass Spectra for <b>1</b>                                               | 29-30   |
| NMR spectra for <b>3b</b>                                                    | 30-31   |
| NMR Spectra for <b>3</b>                                                     | 32      |
| NMR, IR, Mass Spectra, DSC plots, and TGA curve for <b>4</b>                 | 33-35   |
| NMR, IR, Mass Spectra, DSC plots, and TGA curve for <b>5.2H<sub>2</sub>O</b> | 36-38   |
| NMR, IR, DSC plots, and TGA curve for <b>6</b>                               | 39-41   |
| NMR, IR, DSC plots, and TGA curve for <b>7</b>                               | 41-44   |
| NMR, IR, DSC plots, and TGA curve for <b>8</b>                               | 45-47   |
| Computational Details                                                        | 49-54   |
| Thermal Studies of <b>7</b> using Kissinger method                           | 55-59   |
| Non-Covalent Interaction graph                                               | 60-62   |
| References                                                                   | 62-63   |

#### Experimental Procedures

Caution! The compounds in this work are energetic materials that could potentially explode under certain conditions (e.g., impact, friction, or electric discharge). Appropriate safety precautions, such as the use of shields in a fume hood and personal protection equipment (safety glasses, face shields, earplugs, as well as gloves) should be always taken when handling these materials.

**General.** All reagents were purchased from AKSci or TCI or Merck in analytical grade and were used as supplied.  $^1\text{H}$  NMR and  $^{13}\text{C}$  NMR,  $^{15}\text{N}$  NMR spectra were recorded in JEOL DELTA (ECS) 500 ( $^1\text{H}$ , 500 MHz;  $^{13}\text{C}$ , 126 MHz) nuclear magnetic resonance spectrometer. Chemical shifts for  $^1\text{H}$  NMR,  $^{13}\text{C}$  NMR, and  $^{15}\text{N}$  spectra are given concerning external  $(\text{CH}_3)_4\text{Si}$  ( $^1\text{H}$  and  $^{13}\text{C}$ ) and  $\text{CH}_3\text{NO}_2$  ( $^{15}\text{N}$ ).  $[\text{d}_6]$  DMSO was used as a locking solvent unless otherwise stated. IR spectra were recorded using Zn-Se crystal with an ECO-ATR spectrometer (Bruker Alpha II). Density was determined at room temperature by employing Anton Par Ultra5000 gas pycnometer. Decomposition temperatures (onset) were recorded using a dry nitrogen gas purge and a heating rate of  $5\text{ }^\circ\text{C min}^{-1}$  on a differential scanning calorimeter (DSC, Mettler). HRMS was recorded on a Quadrupole Time-of-Flight Mass Spectrometry mass spectrometer and ESI-MS was recorded on Agilent mass spectrometer. Impact and friction sensitivity measurements were made using a standard BAM fall hammer and a BAM friction tester.

### General Synthetic Route

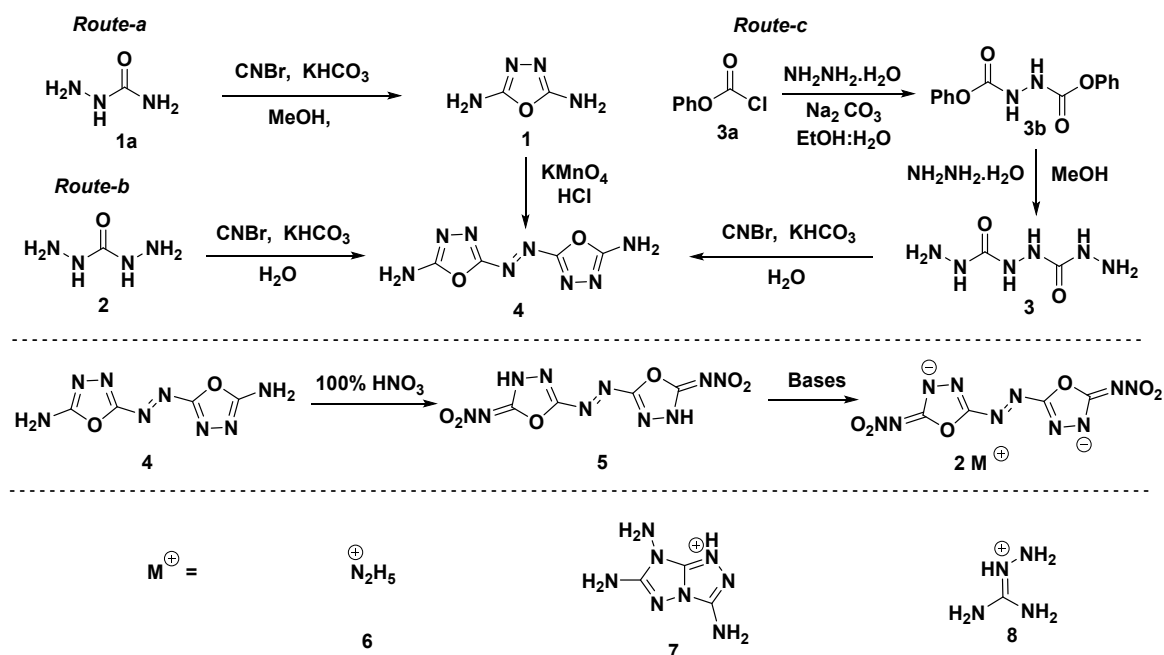

**Scheme 1:** Synthesis of (E)-5,5'-(diazene-1,2-diyl)bis(1,3,4-oxadiazol-2-amine) (**4**), (E)-N,N'-(diazene-1,2-diyl)bis(1,3,4-oxadiazole-5,2-diyl)dinitramide (**5**) and its salts (**6-8**).

**Plausible reaction mechanism demonstrated below.**

Carbohydrazide was dissolved in water and stirred until it is completely getting solubilized. The compound dimerizes to form **1c** (which is also formed during Route C synthesis from phenyl chloroformate and hydrazine hydrate). After 2 hours,  $\text{KHCO}_3$  was added in the reaction mix. In the reaction mix  $\text{KBrO}_3$  (very powerful oxidizing agent) is generated in situ via the following mechanism, which helps to oxidise **1k** to form **4**

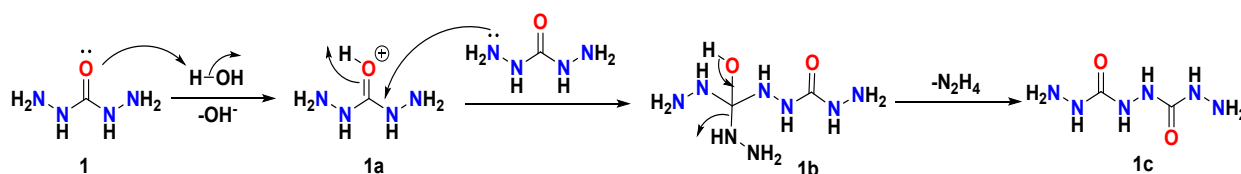

**Route B and C:** Further,  $\text{CNBr}$  addition to the reaction mix causes cyclization to form 1,3,4-oxadiazole with  $\text{NH-NH}$  bridge (**1k**).

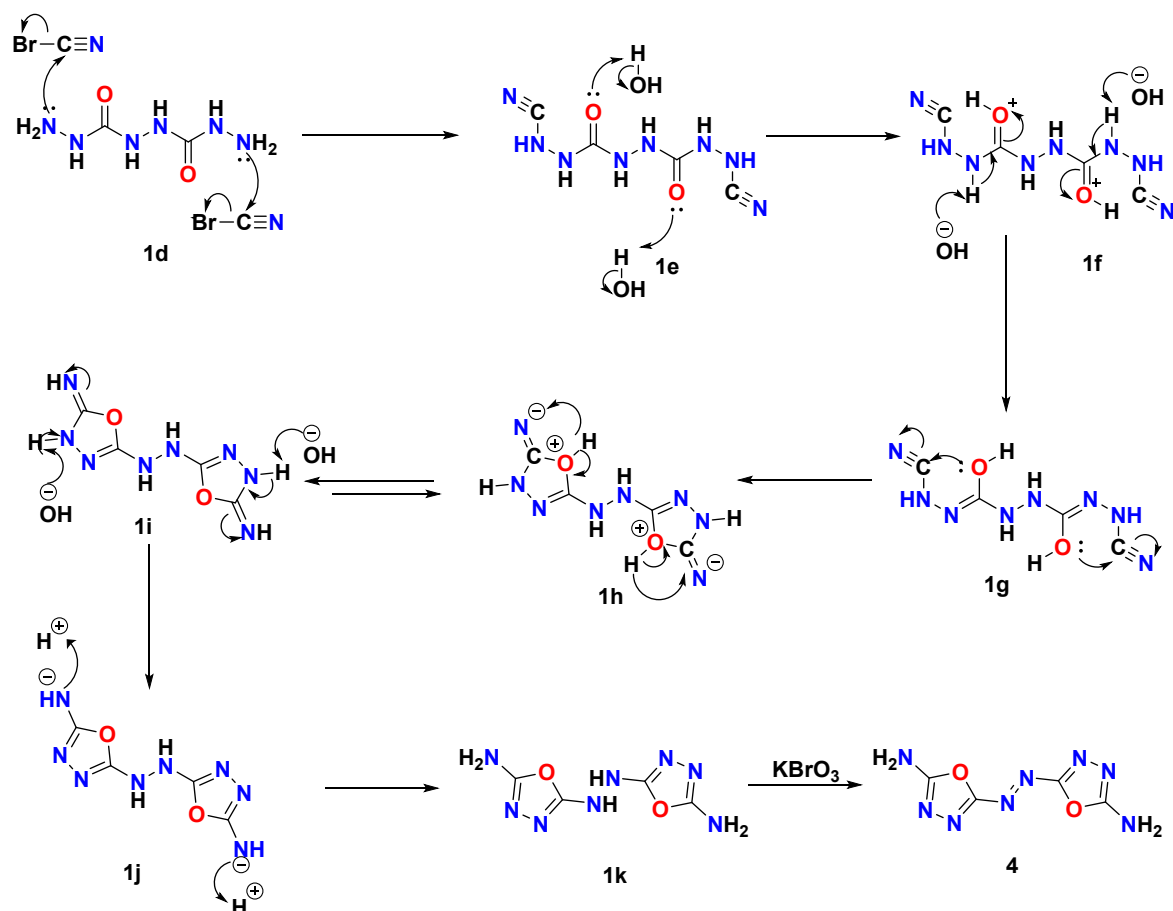

### In situ oxidiser (KBrO<sub>3</sub>) formation in the reaction medium

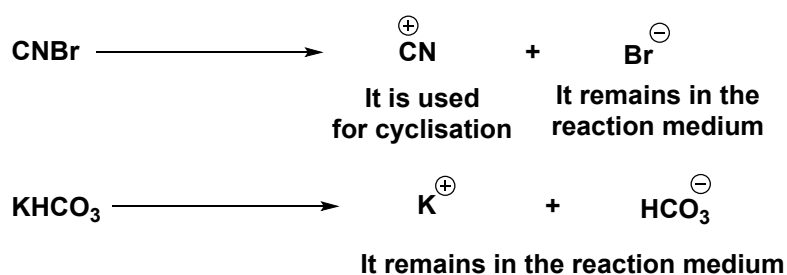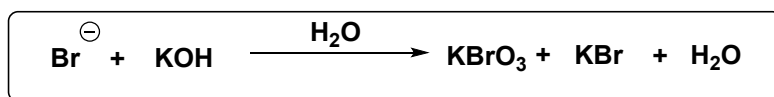

KBrO<sub>3</sub> is a strong oxidizing agent. It is also used as a source of Br<sub>2</sub> in presence of Br<sup>-</sup>.

### Ref:

1. Electrochemical and Solid-State Letters, 13 11H385-H387 2010
2. Johnson Matthey Technol. Rev., 2019, 63, (1)

### Route a:

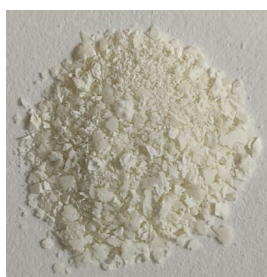

**Synthesis of 1,3,4-oxadiazole- 2,5-diamine (1):** Semicarbazide (**1a**) (2.25 g, 30 mmol) was dissolved in methanol (15 ml) and cyanogen bromide (3.15 g, 30 mmol) was added at 25 °C. Then the suspension was stirred for 16hrs at same temperature. The formed precipitate was collected by filtration and the solvent was removed by rotatory evaporated to afford a white solid 1,3,4-oxadiazole- 2,5-diamine (**1**) with 90 % yield (2.7 g, 27 mmol). <sup>1</sup>H (DMSO-d<sub>6</sub>): δ = 8.39 (s, 4H); <sup>13</sup>C (DMSO-d<sub>6</sub>): δ = 156.0. HRMS (ESI) m/z (M+H)<sup>+</sup> Calculated for C<sub>2</sub>H<sub>5</sub>N<sub>4</sub>O<sup>+</sup>: 101.0458. Found: 101.0456.

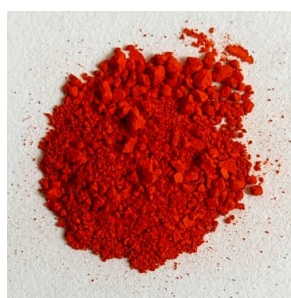

**Synthesis of (E)-5,5'-(diazene-1,2-diyl)bis(1,3,4-oxadiazol-2-amine) (4):** Compound **1** (1.00 g, 10 mmol) was dissolved in 25 mL of 37% HCl, potassium permanganate (1.98 g, 25 mmol) was taken in 25 mL of water and slowly added to compound **1** at 25 °C. The reaction mixture was stirred at 50 °C for 8 hrs and cooled to room temperature. Formed red colour precipitate of **4** was collected by filtration with 20 % yield (0.392 g, 2 mmol).  $T_d$  (onset): 240 °C.  $^1\text{H}$  (DMSO- $d_6$ ):  $\delta$  = 8.31 (s, 4H) ppm;  $^{13}\text{C}$  (DMSO- $d_6$ ):  $\delta$  = 164.18, 163.54; IR (ATR ZnSe): 3324(w), 3048(w), 1662(s), 1567(m), 1515(w), 1407(m), 1295(w), 1071(s), 965(m), 811(w), 736(w), 678(m)  $\text{cm}^{-1}$ . HRMS (ESI)  $m/z$  (M+H) $^+$  Calculated for  $\text{C}_4\text{H}_5\text{N}_8\text{O}_2^+$ : 197.0530. Found: 197.0525. Elemental analysis calculated (%) for  $\text{C}_4\text{H}_4\text{N}_8\text{O}_2 \cdot \text{H}_2\text{O}$  (205.05): C (22.44), H (2.82), N (52.33); found: C (23.38), H (2.50), N (52.42).

#### Route b:

Carbohydrazide (**2**) (0.9 g, 10 mmol) was dissolved in water (10 ml) and stirred until get solubilized. Cyanogen bromide (2.11 g, 20 mmol) was added to it at 25 °C and the red-coloured precipitate was observed after 30 minutes. The formed suspension was stirred for 2 hrs at same temperature and potassium bicarbonate (2.00 g, 20 mmol) was added portion wise. The reaction mixture was stirred for another 2 hrs at same temperature. Formed precipitate was collected by filtration and washed with water (2\*10 mL) and methanol (2\*10 mL). The precipitate was dried to afford compound **4** in 35% yield (0.686 g, 3.5 mmol).

#### Route c:

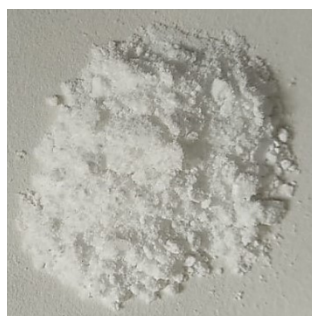

**Synthesis of Diphenyl hydrazodicarboxylate (3b):** In the round bottom flask, sodium carbonate (2.55 g, 25 mol) was taken in 50:50% mixture of ethanol and water (12.5 ml each), hydrazine monohydrate (1.21 ml, 0.025 mol) was added to it. After few minutes, phenyl chloroformate (6.27 ml, 0.05 mol) was added dropwise using an addition funnel and left to stir at 25 °C. After 1 hr of stirring at same temperature, white precipitate was observed, which was filtered, washed with ethanol, and dried to give the desired white compound (**3b**) 95 % yield (6.46 g, 23.7 mmol).  $^1\text{H}$  (DMSO- $d_6$ ):  $\delta$  = 9.95(s, 2H), 7.42(t, J = 10 Hz), 7.25 (t, J = 10 Hz), 7.14(d, J = 10 Hz);  $^{13}\text{C}$  (DMSO- $d_6$ ):  $\delta$  = 154.75, 150.52, 129.50, 125.50, 121.47.

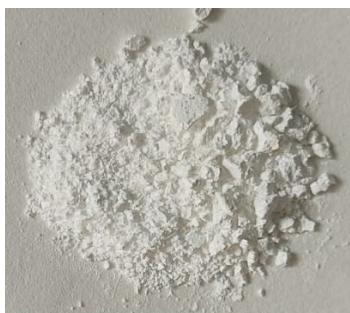

**Synthesis of N, N'-Dicarbazoylhydrazine (3):** 50% Hydrazine monohydrate (6.0 ml, 18.75 mmol) was added dropwise to the solution of diphenyl hydrazodicarboxylate (**3b**) (5.0 g, 18.38 mmol) in methanol (30 ml). The mixture was stirred at 25 °C for 12 hrs. The formed off-white precipitate was filtered, washed with methanol (10 ml), diethyl ether (10 ml), and dried under reduced pressure to give white solid **3** in 94 % yield (2.60 g, 17.62 mmol). <sup>1</sup>H (DMSO-d<sub>6</sub>): δ = 7.73(s, 2H), 7.32(s, 2H), 4.02(s, 4H); <sup>13</sup>C (D<sub>2</sub>O): δ =161.81.

**Synthesis of (E)-5,5'-(diazene-1,2-diyl)bis(1,3,4-oxadiazol-2-amine) (4):** N, N'-Dicarbazoylhydrazine (**3**) (1.48 g, 10 mmol) was dissolved in water (15 ml), cyanogen bromide (2.12 g, 20 mmol) was added to it at room temperature. The red-colored precipitate was observed after 30 minutes and the same was stirred for 3 hrs. Potassium bicarbonate (2.20 g, 22 mmol) was added by portions and stirred for 4 more hours at the same temperature. The formed red solid was collected by filtration and washed with water and methanol to afford compound **4** in 90 % yield (1.76 g, 9 mmol).

**Table S1:** Optimization table for the synthesis of compound (4) *route-c*:

| Entry | Solvent                        | Additive (eq.)<br>added after-h | T<br>( °C) | Time<br>(hrs) | Yield (%)       |
|-------|--------------------------------|---------------------------------|------------|---------------|-----------------|
| 1     | Methanol                       | -                               | 25         | 24            | NA              |
| 2     | Ethanol                        | -                               | 25         | 24            | NA              |
| 3     | Ethanol                        | -                               | 50         | 24            | NA              |
| 4     | Ethanol                        | -                               | 50         | 24            | 10 <sup>a</sup> |
| 5     | Ethanol+H <sub>2</sub> O (1:1) | -                               | 25         | 24            | 20 <sup>a</sup> |
| 6     | H <sub>2</sub> O               | -                               | 25         | 24            | 34 <sup>a</sup> |
| 7     | H <sub>2</sub> O               | KHCO <sub>3</sub> (2.0)-0 h     | 25         | 12            | 55 <sup>a</sup> |
| 8     | H <sub>2</sub> O               | KHCO <sub>3</sub> (2.0)-4 h     | 25         | 12            | 65 <sup>a</sup> |
| 9     | H <sub>2</sub> O               | KHCO <sub>3</sub> (2.0)-3 h     | 25         | 12            | 84 <sup>a</sup> |
| 10    | H <sub>2</sub> O               | KHCO <sub>3</sub> (2.0)-2 h     | 25         | 12            | 70 <sup>a</sup> |
| 11    | H <sub>2</sub> O               | KHCO <sub>3</sub> (2.0)-3 h     | 50         | 12            | 70 <sup>a</sup> |

|    |                  |                             |    |   |                 |
|----|------------------|-----------------------------|----|---|-----------------|
| 12 | H <sub>2</sub> O | KHCO <sub>3</sub> (2.0)-3 h | 25 | 7 | 90 <sup>a</sup> |
|----|------------------|-----------------------------|----|---|-----------------|

In all reactions, CNBr was used 2.0 equivalent, Yield-Isolated yields. (a) Reaction was done in open air.

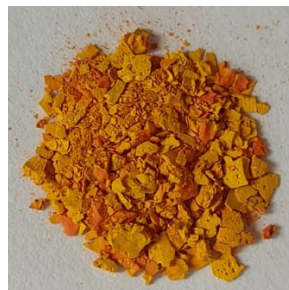

**Synthesis of 5,5'-((E)-diazene-1,2-diyl)bis(2-(nitroimino)-1,3,4-oxadiazole (5.2H<sub>2</sub>O):**

Compound **4** (1 g, 5.10 mmol) was added by portions into stirred 100% HNO<sub>3</sub> (10 ml) at 0 °C, reaction was continued at same temperature for 24 hrs and poured into crushed ice (10 g). The formed precipitate was collected by filtration and washed with cold water, dried in air to afford yellow coloured compound **5** in 82 % yield (1.19 g, 4.16 mmol). Td (onset): 183 °C. <sup>1</sup>H (DMSO-d<sub>6</sub>): δ = 9.93 (br, s, 2H) ppm; <sup>13</sup>C (DMSO-d<sub>6</sub>): δ = 163.43, 161.75; IR (ATR ZnSe): 3740(w), 3320(w), 1653(s), 1523(s), 1401(s), 1316(s), 1146(m), 1056(s), 995(s), 899(w), 748(m), 676(m) cm<sup>-1</sup>. HRMS (ESI) m/z (M+H)<sup>+</sup> calculated for C<sub>4</sub>H<sub>3</sub>N<sub>10</sub>O<sub>6</sub><sup>+</sup>: 287.0232. Found: 287.0444. Elemental analysis calculated (%) for C<sub>4</sub>H<sub>2</sub>N<sub>10</sub>O<sub>6</sub>.0.5H<sub>2</sub>O (286.01): C (16.28), H (1.02), N (47.46); found: C (16.86), H (0.60), N (47.48).

**Table S2:** Optimization table for the synthesis of compound (**5**)

| Entry | Nitrating reagents    | T (°C) | Amount of HNO <sub>3</sub> (mL) | Time (hrs) | Yield (%) |
|-------|-----------------------|--------|---------------------------------|------------|-----------|
| 1     | 100% HNO <sub>3</sub> | 25     | 2 mL <sup>a</sup>               | 2          | NA        |
| 2     | 100% HNO <sub>3</sub> | 25     | 2 mL <sup>a</sup>               | 4          | NA        |
| 3     | 100% HNO <sub>3</sub> | 25     | 2 mL <sup>a</sup>               | 6          | NA        |
| 4     | 100% HNO <sub>3</sub> | 25     | 5 mL <sup>b</sup>               | 12         | 15        |
| 5     | 100% HNO <sub>3</sub> | 25     | 5 mL <sup>b</sup>               | 24         | 47        |
| 6     | 100% HNO <sub>3</sub> | 0      | 5 mL <sup>b</sup>               | 24         | 78        |
| 7     | 100% HNO <sub>3</sub> | 25     | 10 mL <sup>c</sup>              | 24         | 54        |
| 8     | 100% HNO <sub>3</sub> | 0      | 10 mL <sup>c</sup>              | 24         | 82        |

In all the reaction conditions, pinch by pinch addition of substrate in the nitrating mixture was done at 0 °C in the ice bath a: 200 mg substrate was taken; b: 500 mg substrate was taken; c: 1 gram substrate was taken

## General Procedure for the Synthesis of the Salts 6–8

5,5'-((E)-diazene-1,2-diyl)bis(2-(nitroimino)-1,3,4-oxadiazole) (**5**) (0.286 g, 1 mmol) was dissolved in 5 mL of methanol, added, hydrazine monohydrate (0.064 mL, 2 mmol), 3,6,7-Triamino-7H-[1,2,4]triazolo[4,3-b][1,2,4]triazole (TATOT) (0.308 g, 2 mmol), aminoguanidine hydrochloride (0.22 g, 2 mmol), and aqueous ammonia (0.046 mL, 2 mmol) to it and reaction mixtures were stirred for 1 hr at room temperature. The formed precipitate was collected by filtration, and dried in air to afford desired products **6-9** in quantitative yields.

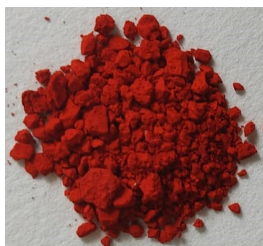

**Hydrazine salt of 5,5'-((E)-diazene-1,2-diyl)bis(2-(nitroimino)-1,3,4-oxadiazole) (6):** Yield: 93 % (0.327 g, 0.92 mmol). Td (onset): 143 °C. <sup>1</sup>H (DMSO-d<sub>6</sub>): δ = 7.24 (br, s, 10H) ppm; <sup>13</sup>C (DMSO-d<sub>6</sub>): δ = 165.80, 164.24; IR(ATR ZnSe): 3304(w), 1500(s), 1420(m), 1290(s), 1238(m), 1090(m), 978(m) cm<sup>-1</sup>. Elemental analysis calculated (%) for C<sub>4</sub>H<sub>10</sub>N<sub>14</sub>O<sub>6</sub>·0.5CH<sub>3</sub>OH·H<sub>2</sub>O (352.10): C (14.07), H (3.67), N (51.03); found: C (13.59), H (3.08), N (51.10).

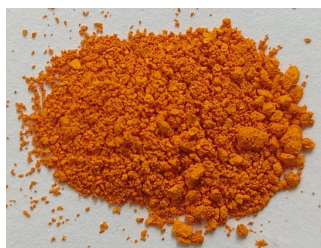

**3,6,7-triamino-7H-[1,2,4]triazolo[4,3-b][1,2,4]triazole salt of 5,5'-((E)-diazene-1,2-diyl)bis(2-(nitroimino)-1,3,4-oxadiazole) (7):** Yield: 94 % (0.560 g, 0.94 mmol). Td (onset): 228 °C. <sup>1</sup>H (DMSO-d<sub>6</sub>): δ = 8.20 (s, 2H), 7.23 (s, 2H), 5.77 (s, 2H) ppm; <sup>13</sup>C (DMSO-d<sub>6</sub>): δ = 165.76, 164.32, 160.13, 147.41, 141.10; IR(ATR ZnSe): 3393(w), 1659(s), 1501(s), 1446(m), 1274(s), 1235(s), 1092(s), 1034(m), 986(m), 852(m) cm<sup>-1</sup>. Elemental analysis calculated (%) for C<sub>10</sub>H<sub>14</sub>N<sub>26</sub>O<sub>6</sub>·H<sub>2</sub>O (506.20): C (19.61), H (2.63), N (59.47); found: C (20.00), H (2.21), N (59.40).

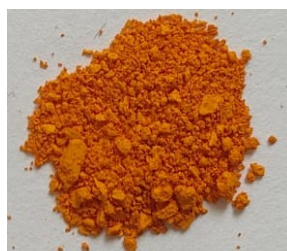



**Aminoguanidine salt of 5,5'-(E)-diazene-1,2-diylbis(2-(nitroimino)-1,3,4-oxadiazole (8):**  
 Yield: 94 % (0.409 g, 0.94 mmol). Td (onset): 181 °C. <sup>1</sup>H (DMSO-d6): δ = 8.55 (s, 1H), 7.24 (br, s, 2H), 6.71 (br, s, 2H), 4.67 (br, s, 2H) ppm; <sup>13</sup>C (DMSO-d6): δ = 165.76, 164.32, 158.73; IR(ATR ZnSe): 3468(w), 3363(w), 1664(s), 1502(s), 1415(w), 1291(s), 1236(m), 1084(m), 1032(w), 989(w) cm<sup>-1</sup>. Elemental analysis calculated (%) for C<sub>6</sub>H<sub>14</sub>N<sub>18</sub>O<sub>6</sub> (434.13): C (16.59), H (3.25), N (58.05); found: C (16.01), H (3.51), N (57.92).

## Results and Discussion

### X-Ray Crystal structure details

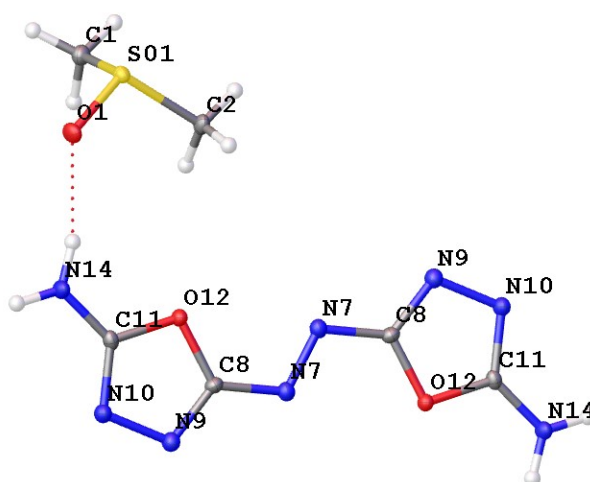

**Figure S1:** Molecular Structure of 4.

**Table S3** Crystal data and structure refinement for 4.

|                   |                                                                             |
|-------------------|-----------------------------------------------------------------------------|
| CCDC No.          | 2173450                                                                     |
| Empirical formula | C <sub>8</sub> H <sub>16</sub> N <sub>8</sub> O <sub>4</sub> S <sub>2</sub> |
| Formula weight    | 352.41                                                                      |
| Temperature/K     | 100                                                                         |
| Crystal system    | triclinic                                                                   |
| Space group       | P-1                                                                         |
| a/Å               | 6.0576(8)                                                                   |
| b/Å               | 7.4466(10)                                                                  |
| c/Å               | 8.8862(13)                                                                  |
| α/°               | 75.730(4)                                                                   |
| β/°               | 86.042(4)                                                                   |

|                                               |                                                               |
|-----------------------------------------------|---------------------------------------------------------------|
| $\gamma/^\circ$                               | 77.998(4)                                                     |
| Volume/ $\text{\AA}^3$                        | 379.92(9)                                                     |
| Z                                             | 1                                                             |
| $\rho_{\text{calc}}/\text{g}/\text{cm}^3$     | 1.540                                                         |
| $\mu/\text{mm}^{-1}$                          | 0.382                                                         |
| F(000)                                        | 184.0                                                         |
| Crystal size/ $\text{mm}^3$                   | $0.33 \times 0.33 \times 0.22$                                |
| Radiation                                     | MoK $\alpha$ ( $\lambda = 0.71073$ )                          |
| $2\Theta$ range for data collection/ $^\circ$ | 5.758 to 56.624                                               |
| Index ranges                                  | $-8 \leq h \leq 8, -9 \leq k \leq 9, -11 \leq l \leq 11$      |
| Reflections collected                         | 3954                                                          |
| Independent reflections                       | 1853 [ $R_{\text{int}} = 0.0298, R_{\text{sigma}} = 0.0386$ ] |
| Data/restraints/parameters                    | 1853/0/102                                                    |
| Goodness-of-fit on $F^2$                      | 1.111                                                         |
| Final R indexes [ $I \geq 2\sigma(I)$ ]       | $R_1 = 0.0319, wR_2 = 0.0721$                                 |
| Final R indexes [all data]                    | $R_1 = 0.0343, wR_2 = 0.0734$                                 |
| Largest diff. peak/hole / $e \text{\AA}^{-3}$ | 0.33/-0.38                                                    |

**Table S4 Fractional Atomic Coordinates ( $\times 10^4$ ) and Equivalent Isotropic Displacement Parameters ( $\text{\AA}^2 \times 10^3$ ) for 4.  $U_{\text{eq}}$  is defined as 1/3 of the trace of the orthogonised  $U_{ij}$  tensor.**

| Atom | x          | y          | z          | $U(\text{eq})$ |
|------|------------|------------|------------|----------------|
| S01  | 7404.4(6)  | 1000.7(5)  | 1170.0(4)  | 11.49(11)      |
| O12  | 3849.6(16) | 3110.1(14) | 5198.2(11) | 12.0(2)        |
| O1   | 8332.7(17) | 203.5(15)  | 2800.4(12) | 16.2(2)        |
| N10  | 5281(2)    | 2680.7(17) | 7548.0(14) | 13.8(2)        |
| N7   | 215(2)     | 4978.0(17) | 5701.3(14) | 12.4(2)        |
| N9   | 3120(2)    | 3777.1(17) | 7518.9(14) | 13.9(2)        |
| N14  | 7442(2)    | 1302.8(18) | 5641.5(14) | 15.8(3)        |
| C11  | 5631(2)    | 2314.3(19) | 6158.3(16) | 11.7(3)        |
| C8   | 2329(2)    | 3985.7(19) | 6152.4(16) | 11.8(3)        |
| C1   | 8897(2)    | 2828(2)    | 265.8(17)  | 14.9(3)        |
| C2   | 4734(2)    | 2468(2)    | 1416.3(17) | 14.8(3)        |

**Table S5 Anisotropic Displacement Parameters ( $\text{\AA}^2 \times 10^3$ ) for 4. The Anisotropic displacement factor exponent takes the form:  $-2\pi^2[h^2a^{*2}U_{11}+2hka^*b^*U_{12}+\dots]$ .**

| Atom | $U_{11}$  | $U_{22}$  | $U_{33}$  | $U_{23}$  | $U_{13}$  | $U_{12}$  |
|------|-----------|-----------|-----------|-----------|-----------|-----------|
| S01  | 11.27(17) | 11.88(17) | 11.17(17) | -3.74(12) | -2.44(12) | -0.05(12) |
| O12  | 9.8(4)    | 14.1(5)   | 11.1(5)   | -3.7(4)   | -1.6(4)   | 0.8(4)    |
| O1   | 15.1(5)   | 18.6(5)   | 11.8(5)   | -2.3(4)   | -5.3(4)   | 3.8(4)    |
| N10  | 11.6(6)   | 16.4(6)   | 12.9(6)   | -4.2(5)   | -1.3(4)   | -0.5(5)   |
| N7   | 11.4(5)   | 13.2(5)   | 12.5(6)   | -2.6(4)   | -1.2(4)   | -2.1(5)   |
| N9   | 12.5(6)   | 14.7(6)   | 14.4(6)   | -4.5(5)   | -1.4(4)   | -0.8(5)   |
| N14  | 11.8(6)   | 21.5(6)   | 12.4(6)   | -5.3(5)   | -2.9(4)   | 3.0(5)    |
| C11  | 10.5(6)   | 12.5(6)   | 11.4(6)   | -0.7(5)   | -2.5(5)   | -2.3(5)   |
| C8   | 11.4(6)   | 12.6(6)   | 11.5(6)   | -4.4(5)   | 1.1(5)    | -1.3(5)   |
| C1   | 12.5(6)   | 17.0(7)   | 16.1(7)   | -5.1(5)   | 0.2(5)    | -3.8(6)   |
| C2   | 9.5(6)    | 18.6(7)   | 14.0(7)   | -2.1(5)   | -1.5(5)   | 0.9(5)    |

**Table S6 Bond Lengths for 4.**

| Atom | Atom | Length/ $\text{\AA}$ | Atom | Atom            | Length/ $\text{\AA}$ |
|------|------|----------------------|------|-----------------|----------------------|
| S01  | O1   | 1.5223(10)           | N10  | C11             | 1.3230(18)           |
| S01  | C1   | 1.7851(15)           | N7   | N7 <sup>1</sup> | 1.282(2)             |
| S01  | C2   | 1.7866(14)           | N7   | C8              | 1.3702(18)           |
| O12  | C11  | 1.3622(16)           | N9   | C8              | 1.2978(18)           |
| O12  | C8   | 1.3811(16)           | N14  | C11             | 1.3185(18)           |
| N10  | N9   | 1.3895(17)           |      |                 |                      |

<sup>1</sup>-X,1-Y,1-Z

**Table S7 Bond Angles for 4.**

| Atom            | Atom | Atom | Angle/ $^\circ$ | Atom | Atom | Atom | Angle/ $^\circ$ |
|-----------------|------|------|-----------------|------|------|------|-----------------|
| O1              | S01  | C1   | 106.09(7)       | N10  | C11  | O12  | 113.09(12)      |
| O1              | S01  | C2   | 105.11(6)       | N14  | C11  | O12  | 119.08(12)      |
| C1              | S01  | C2   | 98.01(7)        | N14  | C11  | N10  | 127.83(13)      |
| C11             | O12  | C8   | 101.49(11)      | N7   | C8   | O12  | 123.58(12)      |
| C11             | N10  | N9   | 105.59(11)      | N9   | C8   | O12  | 112.83(12)      |
| N7 <sup>1</sup> | N7   | C8   | 113.35(15)      | N9   | C8   | N7   | 123.59(13)      |
| C8              | N9   | N10  | 106.99(12)      |      |      |      |                 |

<sup>1</sup>-X,1-Y,1-Z

**Table S8 Torsion Angles for 4.**

| A               | B   | C   | D   | Angle/ $^\circ$ | A   | B   | C   | D   | Angle/ $^\circ$ |
|-----------------|-----|-----|-----|-----------------|-----|-----|-----|-----|-----------------|
| N10             | N9  | C8  | O12 | -0.99(16)       | C11 | O12 | C8  | N7  | -179.08(13)     |
| N10             | N9  | C8  | N7  | 179.35(13)      | C11 | O12 | C8  | N9  | 1.26(15)        |
| N7 <sup>1</sup> | N7  | C8  | O12 | -0.2(2)         | C11 | N10 | N9  | C8  | 0.27(15)        |
| N7 <sup>1</sup> | N7  | C8  | N9  | 179.39(15)      | C8  | O12 | C11 | N10 | -1.08(15)       |
| N9              | N10 | C11 | O12 | 0.55(16)        | C8  | O12 | C11 | N14 | 178.79(13)      |
| N9              | N10 | C11 | N14 | -179.30(14)     |     |     |     |     |                 |

<sup>1</sup>-X,1-Y,1-Z

**Table S9** Hydrogen Atom Coordinates ( $\text{\AA} \times 10^4$ ) and Isotropic Displacement Parameters ( $\text{\AA}^2 \times 10^3$ ) for **4**.

| Atom | x        | y       | z       | U(eq) |
|------|----------|---------|---------|-------|
| H14A | 8602.85  | 778.57  | 6250.61 | 19    |
| H14B | 7488.74  | 1152.01 | 4687.45 | 19    |
| H1A  | 8790.9   | 3717.69 | 929.03  | 22    |
| H1B  | 8233.54  | 3498.04 | -743.25 | 22    |
| H1C  | 10486.31 | 2270.16 | 115.16  | 22    |
| H2A  | 3713.96  | 1688.02 | 2026.11 | 22    |
| H2B  | 4085.21  | 3104.68 | 396.5   | 22    |
| H2C  | 4938.13  | 3414.91 | 1961.32 | 22    |

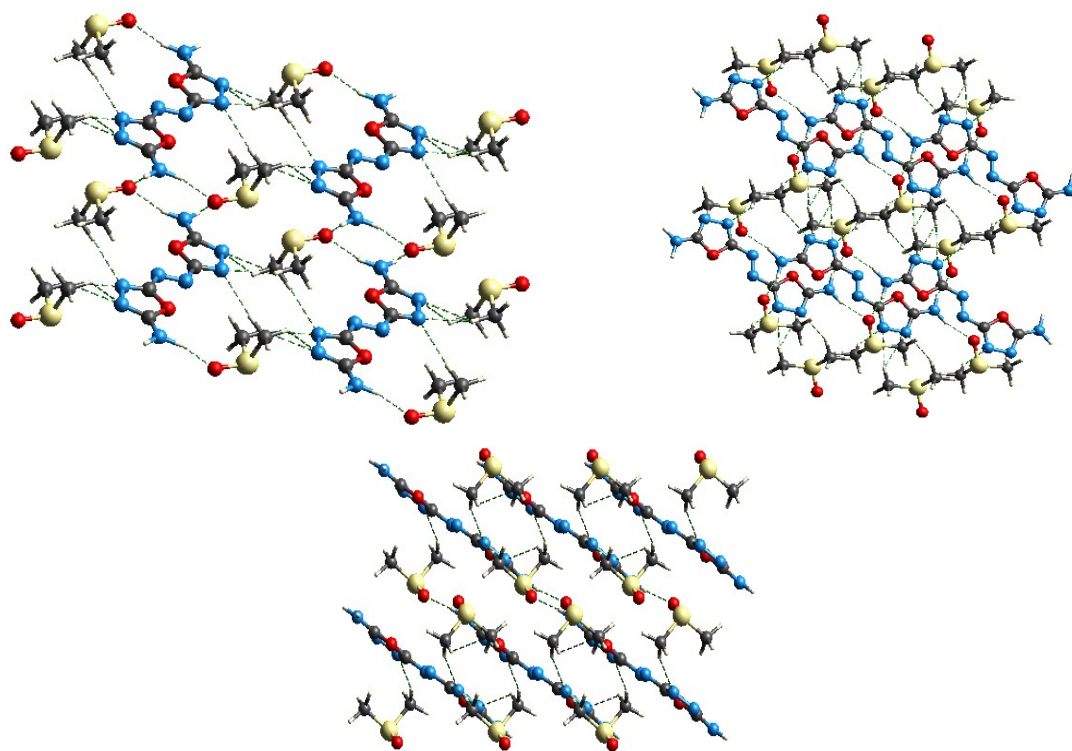

**Figure S2:** a) Packing diagram along the a-axis. b) Packing diagram along the b-axis. c) Packing diagram along the c-axis.

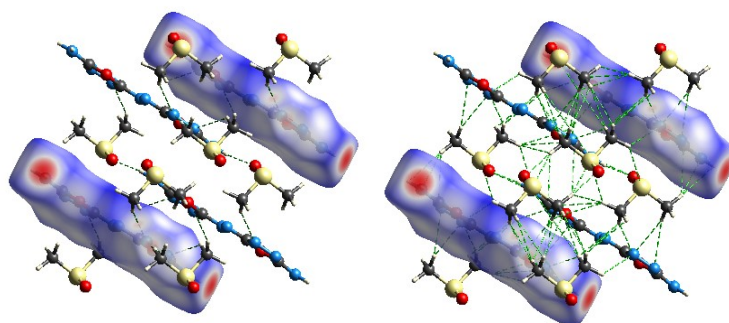

**Figure S3:** Hirshfeld surfaces of compound **4** showing H-bonding interactions and  $\pi$ - $\pi$  bond type interactions.

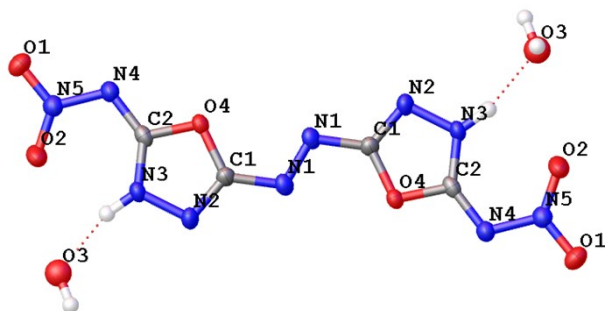

**Figure S4:** Molecular Structure of **5**. 2H<sub>2</sub>O

**Table S10** Crystal data and structure refinement for **5**. 2H<sub>2</sub>O

|                                    |                                                             |
|------------------------------------|-------------------------------------------------------------|
| CCDC No.                           | 2173452                                                     |
| Empirical formula                  | C <sub>2</sub> H <sub>3</sub> N <sub>5</sub> O <sub>4</sub> |
| Formula weight                     | 161.09                                                      |
| Temperature/K                      | 100                                                         |
| Crystal system                     | monoclinic                                                  |
| Space group                        | C2/c                                                        |
| a/Å                                | 24.375(3)                                                   |
| b/Å                                | 5.2668(6)                                                   |
| c/Å                                | 9.2236(12)                                                  |
| α/°                                | 90                                                          |
| β/°                                | 103.392(4)                                                  |
| γ/°                                | 90                                                          |
| Volume/Å <sup>3</sup>              | 1151.9(3)                                                   |
| Z                                  | 8                                                           |
| ρ <sub>calc</sub> /cm <sup>3</sup> | 1.858                                                       |
| μ/mm <sup>-1</sup>                 | 0.176                                                       |
| F(000)                             | 656.0                                                       |
| Crystal size/mm <sup>3</sup>       | 0.33 × 0.22 × 0.22                                          |
| Radiation                          | MoKα (λ = 0.71073)                                          |
| 2θ range for data collection/°     | 6.874 to 61.226                                             |
| Index ranges                       | -33 ≤ h ≤ 32, -7 ≤ k ≤ 7, -13 ≤ l ≤ 13                      |

|                                                |                                                                  |
|------------------------------------------------|------------------------------------------------------------------|
| Reflections collected                          | 7404                                                             |
| Independent reflections                        | 1616 [ $R_{\text{int}} = 0.0710$ , $R_{\text{sigma}} = 0.0666$ ] |
| Data/restraints/parameters                     | 1616/0/102                                                       |
| Goodness-of-fit on $F^2$                       | 1.087                                                            |
| Final R indexes [ $I \geq 2\sigma(I)$ ]        | $R_1 = 0.0779$ , $wR_2 = 0.1437$                                 |
| Final R indexes [all data]                     | $R_1 = 0.1138$ , $wR_2 = 0.1565$                                 |
| Largest diff. peak/hole / $e \text{ \AA}^{-3}$ | 0.62/-0.58                                                       |

**Table S11 Fractional Atomic Coordinates ( $\times 10^4$ ) and Equivalent Isotropic Displacement Parameters ( $\text{\AA}^2 \times 10^3$ ) for 5.  $U_{\text{eq}}$  is defined as 1/3 of the trace of the orthogonalised  $U_{ij}$  tensor.**

| Atom | x          | y       | z       | U(eq)   |
|------|------------|---------|---------|---------|
| O3   | 6958.3(8)  | 1470(4) | 6834(2) | 14.4(4) |
| O1   | 5822.7(9)  | -501(4) | 9822(2) | 21.1(5) |
| O2   | 5613.6(9)  | 2728(5) | 8355(2) | 25.3(6) |
| N3   | 6316.8(11) | 4295(5) | 6879(3) | 14.5(5) |
| N1   | 7346.1(10) | 3483(5) | 4937(3) | 15.2(5) |
| N2   | 6604.0(10) | 5158(5) | 5861(3) | 16.9(5) |
| N4   | 6396.7(10) | 373(5)  | 8363(3) | 15.7(5) |
| N5   | 5922.5(10) | 943(5)  | 8855(3) | 16.5(5) |
| C    | 6976.1(12) | 3423(6) | 5868(3) | 14.2(6) |
| C1   | 6515.8(12) | 2055(6) | 7429(3) | 13.4(6) |
| O4   | 5298.4(10) | 6681(5) | 6340(2) | 25.4(5) |

**Table S12 Anisotropic Displacement Parameters ( $\text{\AA}^2 \times 10^3$ ) for 5. The Anisotropic displacement factor exponent takes the form:  $-2\pi^2[h^2a^{*2}U_{11}+2hka^*b^*U_{12}+\dots]$ .**

| Atom | $U_{11}$ | $U_{22}$ | $U_{33}$ | $U_{23}$ | $U_{13}$ | $U_{12}$ |
|------|----------|----------|----------|----------|----------|----------|
| O3   | 11.9(10) | 15.3(11) | 17.4(9)  | 1.3(8)   | 5.8(8)   | 2.5(8)   |
| O1   | 24.2(12) | 21.3(13) | 19.8(10) | 5.0(9)   | 9.2(9)   | -0.3(9)  |
| O2   | 19.2(11) | 33.6(14) | 25.4(11) | 11.6(10) | 9.7(9)   | 11.6(10) |
| N3   | 13.1(12) | 14.6(13) | 17.8(11) | 0.3(9)   | 7.4(9)   | 2.4(10)  |
| N1   | 11.7(12) | 15.3(13) | 19.5(11) | -0.5(10) | 5.2(10)  | -0.2(9)  |
| N2   | 15.1(12) | 16.8(13) | 21.1(11) | 2.0(10)  | 9.3(10)  | 1.1(10)  |
| N4   | 15.3(12) | 16.9(13) | 16.0(10) | 1.1(10)  | 5.8(9)   | 2.6(10)  |
| N5   | 16.0(13) | 18.2(14) | 15.6(11) | 0.5(9)   | 4.5(10)  | 1.5(10)  |
| C    | 14.1(14) | 12.0(14) | 17.3(12) | 0.9(11)  | 5.6(11)  | 0.0(11)  |
| C1   | 10.9(13) | 14.3(15) | 14.6(12) | -4.4(10) | 2.5(10)  | 1.2(10)  |

**Table S13 Bond Lengths for 5.**

**Atom Atom Length/\AA Atom Atom Length/\AA**

**Table S13 Bond Lengths for 5.**

| Atom | Atom | Length/Å | Atom | Atom            | Length/Å |
|------|------|----------|------|-----------------|----------|
| O3   | C    | 1.368(3) | N1   | N1 <sup>1</sup> | 1.268(5) |
| O3   | C1   | 1.354(3) | N1   | C               | 1.382(3) |
| O1   | N5   | 1.238(3) | N2   | C               | 1.287(4) |
| O2   | N5   | 1.226(3) | N4   | N5              | 1.370(3) |
| N3   | N2   | 1.372(3) | N4   | C1              | 1.314(4) |
| N3   | C1   | 1.331(4) |      |                 |          |

<sup>1</sup>3/2-X,1/2-Y,1-Z

**Table S14 Bond Angles for 5.**

| Atom            | Atom | Atom | Angle/°  | Atom | Atom | Atom | Angle/°  |
|-----------------|------|------|----------|------|------|------|----------|
| C1              | O3   | C    | 104.0(2) | O2   | N5   | N4   | 122.4(2) |
| C1              | N3   | N2   | 110.8(2) | O3   | C    | N1   | 123.1(2) |
| N1 <sup>1</sup> | N1   | C    | 112.4(3) | N2   | C    | O3   | 114.1(2) |
| C               | N2   | N3   | 103.4(2) | N2   | C    | N1   | 122.8(3) |
| C1              | N4   | N5   | 113.6(2) | N3   | C1   | O3   | 107.5(2) |
| O1              | N5   | N4   | 115.2(2) | N4   | C1   | O3   | 115.5(3) |
| O2              | N5   | O1   | 122.4(2) | N4   | C1   | N3   | 137.0(3) |

<sup>1</sup>3/2-X,1/2-Y,1-Z

**Table S15 Torsion Angles for 5.**

| A               | B  | C  | D  | Angle/°   | A  | B  | C  | D  | Angle/°   |
|-----------------|----|----|----|-----------|----|----|----|----|-----------|
| N3              | N2 | C  | O3 | -0.5(3)   | C  | O3 | C1 | N3 | -3.2(3)   |
| N3              | N2 | C  | N1 | 177.1(3)  | C  | O3 | C1 | N4 | 177.2(2)  |
| N1 <sup>1</sup> | N1 | C  | O3 | 1.3(5)    | C1 | O3 | C  | N1 | -175.2(3) |
| N1 <sup>1</sup> | N1 | C  | N2 | -176.1(3) | C1 | O3 | C  | N2 | 2.3(3)    |
| N2              | N3 | C1 | O3 | 3.1(3)    | C1 | N3 | N2 | C  | -1.6(3)   |
| N2              | N3 | C1 | N4 | -177.4(3) | C1 | N4 | N5 | O1 | -174.8(2) |
| N5              | N4 | C1 | O3 | -175.5(2) | C1 | N4 | N5 | O2 | 6.5(4)    |
| N5              | N4 | C1 | N3 | 5.1(5)    |    |    |    |    |           |

<sup>1</sup>3/2-X,1/2-Y,1-Z

**Table S16 Hydrogen Atom Coordinates (Å×10<sup>4</sup>) and Isotropic Displacement Parameters (Å<sup>2</sup>×10<sup>3</sup>) for 5.**

| Atom | x        | y        | z        | U(eq)  |
|------|----------|----------|----------|--------|
| H3   | 5998(17) | 5050(80) | 6920(40) | 30(10) |
| H4A  | 5337.5   | 8105.43  | 5942.64  | 38     |
| H4B  | 5074.63  | 5855.06  | 5659.53  | 38     |



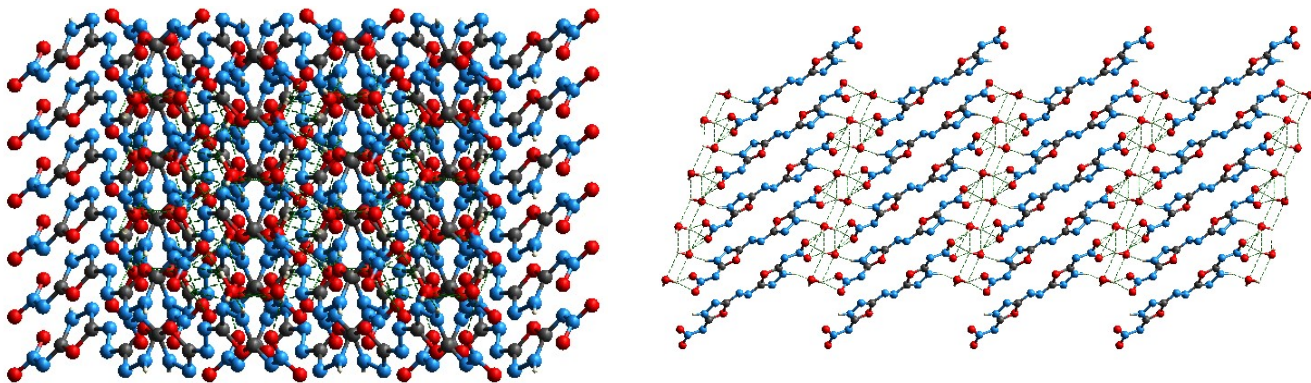

**Figure S5:** Packing diagram of compound 5 along the c-axis.

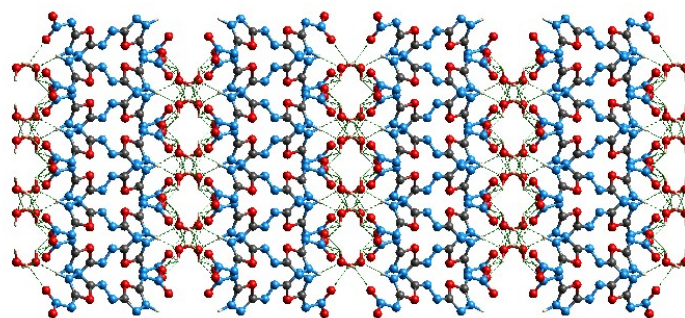

axis. (c) along

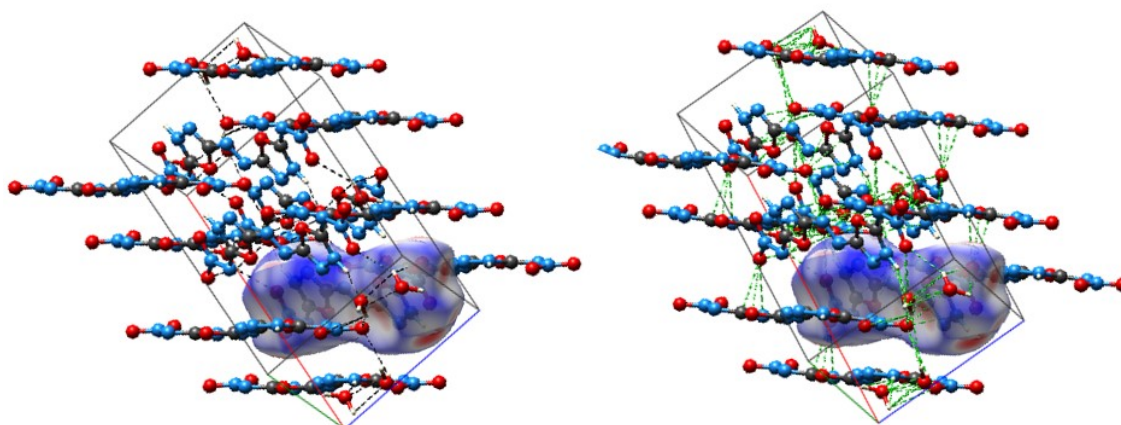

**Figure S6:** Hirshfeld surfaces of compound 5 showing H-bonding interactions and  $\pi$ - $\pi$  bond type interactions in a unit cell.

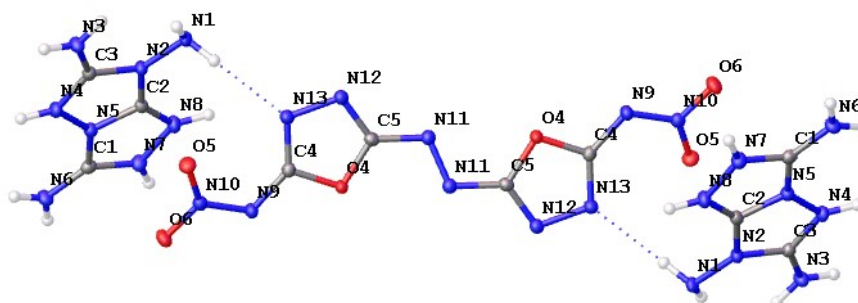

**Figure S7:** Molecular Structure of 7.

**Table S17** Crystal data and structure refinement for 7.

CCDC No.

2173451



|                                                |                                                               |
|------------------------------------------------|---------------------------------------------------------------|
| Empirical formula                              | $C_5H_8N_{13}O_3$                                             |
| Formula weight                                 | 298.24                                                        |
| Temperature/K                                  | 100                                                           |
| Crystal system                                 | Triclinic                                                     |
| Space group                                    | P-1                                                           |
| a/Å                                            | 6.7799(6)                                                     |
| b/Å                                            | 6.8854(6)                                                     |
| c/Å                                            | 12.8125(12)                                                   |
| $\alpha/^\circ$                                | 77.172(3)                                                     |
| $\beta/^\circ$                                 | 89.270(3)                                                     |
| $\gamma/^\circ$                                | 69.344(2)                                                     |
| Volume/Å <sup>3</sup>                          | 544.29(9)                                                     |
| Z                                              | 2                                                             |
| $\rho_{\text{calc}}/\text{g/cm}^3$             | 1.820                                                         |
| $\mu/\text{mm}^{-1}$                           | 0.152                                                         |
| F(000)                                         | 306.0                                                         |
| Crystal size/mm <sup>3</sup>                   | 0.33 × 0.22 × 0.22                                            |
| Radiation                                      | MoK $\alpha$ ( $\lambda = 0.71073$ )                          |
| 2 $\theta$ range for data collection/ $^\circ$ | 6.438 to 56.712                                               |
| Index ranges                                   | $-9 \leq h \leq 9, -9 \leq k \leq 9, -17 \leq l \leq 17$      |
| Reflections collected                          | 8556                                                          |
| Independent reflections                        | 2708 [ $R_{\text{int}} = 0.0382, R_{\text{sigma}} = 0.0400$ ] |
| Data/restraints/parameters                     | 2708/0/198                                                    |
| Goodness-of-fit on F <sup>2</sup>              | 1.059                                                         |
| Final R indexes [ $I \geq 2\sigma(I)$ ]        | $R_1 = 0.0474, wR_2 = 0.1271$                                 |
| Final R indexes [all data]                     | $R_1 = 0.0574, wR_2 = 0.1365$                                 |
| Largest diff. peak/hole / e Å <sup>-3</sup>    | 0.45/-0.71                                                    |

**Table S18** Fractional Atomic Coordinates ( $\times 10^4$ ) and Equivalent Isotropic Displacement Parameters ( $\text{\AA}^2 \times 10^3$ ) for **7**.  $U_{\text{eq}}$  is defined as 1/3 of the trace of the orthogonalised  $U_{ij}$  tensor.

| Atom | x          | y          | z          | $U(\text{eq})$ |
|------|------------|------------|------------|----------------|
| O4   | 7609.2(19) | 4516.6(19) | 1365.2(9)  | 14.0(3)        |
| O5   | 1888(2)    | 5018(2)    | 2300.7(10) | 18.5(3)        |
| O6   | 3367(2)    | 3399(2)    | 3911.2(10) | 19.3(3)        |
| N11  | 9178(2)    | 5826(2)    | -188.9(11) | 13.9(3)        |
| N2   | -437(2)    | 9440(2)    | 2293.3(11) | 13.9(3)        |
| N9   | 5424(2)    | 4035(2)    | 2641.6(12) | 14.8(3)        |
| N5   | -56(2)     | 8208(2)    | 4011.4(11) | 13.5(3)        |
| N13  | 4270(2)    | 6684(2)    | 896.2(11)  | 14.4(3)        |
| N4   | -2109(2)   | 8372(2)    | 3742.3(12) | 14.6(3)        |
| N10  | 3489(2)    | 4189(2)    | 2932.6(12) | 14.6(3)        |
| N12  | 5533(2)    | 7199(2)    | 101.9(11)  | 14.5(3)        |
| N8   | 2876(2)    | 8702(3)    | 3411.4(12) | 17.0(3)        |
| N6   | 834(2)     | 6995(2)    | 5902.6(12) | 17.0(3)        |
| N7   | 3019(2)    | 7941(2)    | 4531.9(12) | 17.4(3)        |
| N1   | -82(2)     | 9858(3)    | 1200.7(11) | 15.5(3)        |
| N3   | -3855(2)   | 9364(2)    | 2019.2(12) | 17.0(3)        |
| C5   | 7457(3)    | 5895(3)    | 399.8(13)  | 13.8(3)        |
| C2   | 959(3)     | 8835(3)    | 3164.7(13) | 14.0(3)        |
| C4   | 5562(3)    | 5108(3)    | 1639.2(14) | 13.4(3)        |
| C3   | -2224(3)   | 9071(3)    | 2684.7(14) | 13.6(3)        |
| C1   | 1256(3)    | 7639(3)    | 4898.0(14) | 14.5(3)        |

**Table S19** Anisotropic Displacement Parameters ( $\text{\AA}^2 \times 10^3$ ) for **7**. The Anisotropic displacement factor exponent takes the form:  $-2\pi^2[h^2a^{*2}U_{11}+2hka^*b^*U_{12}+\dots]$ .

| Atom | $U_{11}$ | $U_{22}$ | $U_{33}$ | $U_{23}$ | $U_{13}$ | $U_{12}$ |
|------|----------|----------|----------|----------|----------|----------|
|------|----------|----------|----------|----------|----------|----------|

**Table S19** Anisotropic Displacement Parameters ( $\text{\AA}^2 \times 10^3$ ) for **7**. The Anisotropic displacement factor exponent takes the form:  $-2\pi^2[h^2a^*2U_{11}+2hka^*b^*U_{12}+\dots]$ .

| Atom | $U_{11}$ | $U_{22}$ | $U_{33}$ | $U_{23}$ | $U_{13}$ | $U_{12}$ |
|------|----------|----------|----------|----------|----------|----------|
| O4   | 12.5(6)  | 15.5(6)  | 11.4(6)  | -0.6(4)  | 1.9(4)   | -3.6(5)  |
| O5   | 14.4(6)  | 22.9(7)  | 16.3(6)  | -2.1(5)  | -2.5(5)  | -5.7(5)  |
| O6   | 19.2(7)  | 26.1(7)  | 12.4(6)  | -0.5(5)  | 1.7(5)   | -10.3(5) |
| N11  | 13.7(7)  | 15.2(7)  | 12.9(7)  | -3.6(5)  | 0.9(5)   | -5.0(6)  |
| N2   | 11.3(7)  | 17.9(7)  | 11.4(7)  | -1.8(5)  | 1.0(5)   | -4.8(5)  |
| N9   | 12.4(7)  | 18.1(7)  | 12.8(7)  | -1.1(5)  | 1.5(5)   | -5.5(6)  |
| N5   | 12.4(7)  | 15.7(7)  | 12.3(7)  | -2.5(5)  | 0.6(5)   | -5.2(5)  |
| N13  | 14.4(7)  | 15.6(7)  | 11.7(7)  | -1.7(5)  | 1.0(5)   | -4.5(6)  |
| N4   | 10.9(7)  | 18.7(7)  | 14.7(7)  | -2.8(6)  | 1.6(5)   | -6.7(6)  |
| N10  | 14.5(7)  | 14.9(7)  | 14.0(7)  | -3.2(5)  | 1.1(5)   | -4.8(5)  |
| N12  | 15.0(7)  | 15.6(7)  | 12.4(7)  | -2.8(5)  | 1.5(5)   | -5.2(6)  |
| N8   | 13.5(7)  | 23.2(8)  | 14.6(7)  | -4.5(6)  | 1.1(5)   | -6.9(6)  |
| N6   | 17.1(7)  | 21.6(7)  | 11.4(7)  | -1.0(6)  | -1.1(6)  | -7.3(6)  |
| N7   | 14.7(7)  | 22.5(8)  | 14.3(7)  | -3.7(6)  | -0.6(6)  | -6.2(6)  |
| N1   | 15.9(7)  | 17.5(7)  | 10.7(7)  | -1.0(6)  | 4.0(5)   | -4.5(6)  |
| N3   | 14.1(7)  | 23.0(8)  | 13.2(7)  | -0.2(6)  | -1.3(5)  | -8.2(6)  |
| C5   | 15.7(8)  | 13.4(7)  | 11.9(7)  | -2.6(6)  | -0.1(6)  | -5.1(6)  |
| C2   | 14.1(8)  | 14.4(8)  | 12.8(8)  | -2.7(6)  | 2.6(6)   | -4.7(6)  |
| C4   | 12.4(8)  | 14.5(8)  | 13.9(8)  | -4.2(6)  | 1.1(6)   | -5.1(6)  |
| C3   | 12.8(8)  | 13.6(7)  | 14.5(8)  | -3.7(6)  | 1.8(6)   | -4.6(6)  |
| C1   | 14.2(8)  | 13.4(8)  | 14.7(8)  | -4.1(6)  | -0.4(6)  | -3.1(6)  |

**Table S20** Bond Lengths for **7**.

| Atom | Atom | Length/ $\text{\AA}$ | Atom | Atom | Length/ $\text{\AA}$ |
|------|------|----------------------|------|------|----------------------|
| O4   | C5   | 1.362(2)             | N5   | C2   | 1.349(2)             |

**Table S20** Bond Lengths for 7.

| Atom | Atom             | Length/Å   | Atom | Atom  | Length/Å |
|------|------------------|------------|------|-------|----------|
| O4   | C4               | 1.367(2)   | N5   | C1    | 1.348(2) |
| O5   | N10              | 1.2406(19) | N13  | N12   | 1.388(2) |
| O6   | N10              | 1.2655(19) | N13  | C4    | 1.320(2) |
| N11  | N11 <sup>1</sup> | 1.283(3)   | N4   | C3    | 1.327(2) |
| N11  | C5               | 1.374(2)   | N12  | C5    | 1.299(2) |
| N2   | N1               | 1.4007(19) | N8   | N7    | 1.407(2) |
| N2   | C2               | 1.363(2)   | N8   | C2    | 1.307(2) |
| N2   | C3               | 1.389(2)   |      | N6 C1 | 1.327(2) |
| N9   | N10              | 1.334(2)   |      | N7 C1 | 1.345(2) |
| N9   | C4               | 1.352(2)   |      | N3 C3 | 1.334(2) |
| N5   | N4               | 1.398(2)   |      |       |          |

<sup>1</sup>2-X,1-Y,-Z**Table S21** Bond Angles for 7.

| Atom             | Atom | Atom | Angle/°    | Atom | Atom | Atom | Angle/°    |
|------------------|------|------|------------|------|------|------|------------|
| C5               | O4   | C4   | 102.43(13) | C1   | N7   | N8   | 112.95(14) |
| N11 <sup>1</sup> | N11  | C5   | 112.84(18) | O4   | C5   | N11  | 122.21(15) |
| C2               | N2   | N1   | 129.20(14) | N12  | C5   | O4   | 112.73(15) |
| C2               | N2   | C3   | 105.59(14) | N12  | C5   | N11  | 125.03(15) |
| C3               | N2   | N1   | 123.62(14) | N5   | C2   | N2   | 105.53(15) |
| N10              | N9   | C4   | 116.63(14) | N8   | C2   | N2   | 140.22(16) |
| C2               | N5   | N4   | 113.90(14) | N8   | C2   | N5   | 114.24(15) |
| C1               | N5   | N4   | 138.52(15) | N9   | C4   | O4   | 111.03(14) |
| C1               | N5   | C2   | 107.56(15) | N13  | C4   | O4   | 112.07(15) |
| C4               | N13  | N12  | 105.92(14) | N13  | C4   | N9   | 136.64(16) |
| C3               | N4   | N5   | 100.72(13) | N4   | C3   | N2   | 114.18(15) |
| O5               | N10  | O6   | 120.80(14) | N4   | C3   | N3   | 124.95(16) |
| O5               | N10  | N9   | 123.56(14) | N3   | C3   | N2   | 120.84(15) |

**Table S21** Bond Angles for 7.

| Atom | Atom | Atom | Angle/°    | Atom | Atom | Atom | Angle/°    |
|------|------|------|------------|------|------|------|------------|
| O6   | N10  | N9   | 115.64(14) | N6   | C1   | N5   | 126.69(16) |
| C5   | N12  | N13  | 106.83(14) | N6   | C1   | N7   | 128.79(16) |
| C2   | N8   | N7   | 100.75(14) | N7   | C1   | N5   | 104.49(15) |

<sup>1</sup>2-X,1-Y,-Z**Table S22** Torsion Angles for 7.

| A                | B   | C  | D   | Angle/°     | A  | B   | C   | D   | Angle/°     |
|------------------|-----|----|-----|-------------|----|-----|-----|-----|-------------|
| N11 <sup>1</sup> | N11 | C5 | O4  | 9.4(3)      | N1 | N2  | C3  | N4  | 169.70(15)  |
| N11 <sup>1</sup> | N11 | C5 | N12 | -168.65(18) | N1 | N2  | C3  | N3  | -8.7(3)     |
| N5               | N4  | C3 | N2  | -2.81(18)   | C5 | O4  | C4  | N9  | -173.98(14) |
| N5               | N4  | C3 | N3  | 175.46(16)  | C5 | O4  | C4  | N13 | 1.05(18)    |
| N13              | N12 | C5 | O4  | -0.83(19)   | C2 | N2  | C3  | N4  | 2.9(2)      |
| N13              | N12 | C5 | N11 | 177.35(16)  | C2 | N2  | C3  | N3  | -175.42(16) |
| N4               | N5  | C2 | N2  | -0.10(19)   | C2 | N5  | N4  | C3  | 1.76(18)    |
| N4               | N5  | C2 | N8  | 179.51(14)  | C2 | N5  | C1  | N6  | 177.56(16)  |
| N4               | N5  | C1 | N6  | -0.4(3)     | C2 | N5  | C1  | N7  | -0.49(18)   |
| N4               | N5  | C1 | N7  | -178.50(18) | C2 | N8  | N7  | C1  | 0.59(19)    |
| N10              | N9  | C4 | O4  | -168.67(14) | C4 | O4  | C5  | N11 | -178.32(15) |
| N10              | N9  | C4 | N13 | 18.0(3)     | C4 | O4  | C5  | N12 | -0.09(18)   |
| N12              | N13 | C4 | O4  | -1.55(19)   | C4 | N9  | N10 | O5  | 9.4(2)      |
| N12              | N13 | C4 | N9  | 171.7(2)    | C4 | N9  | N10 | O6  | -171.59(15) |
| N8               | N7  | C1 | N5  | -0.06(19)   | C4 | N13 | N12 | C5  | 1.42(18)    |
| N8               | N7  | C1 | N6  | -178.06(16) | C3 | N2  | C2  | N5  | -1.56(18)   |
| N7               | N8  | C2 | N2  | 178.5(2)    | C3 | N2  | C2  | N8  | 179.0(2)    |
| N7               | N8  | C2 | N5  | -0.92(19)   | C1 | N5  | N4  | C3  | 179.7(2)    |
| N1               | N2  | C2 | N5  | -167.32(16) | C1 | N5  | C2  | N2  | -178.66(14) |
| N1               | N2  | C2 | N8  | 13.2(4)     | C1 | N5  | C2  | N8  | 1.0(2)      |

<sup>1</sup>2-X,1-Y,-Z

**Table S23** Hydrogen Atom Coordinates ( $\text{\AA} \times 10^4$ ) and Isotropic Displacement Parameters ( $\text{\AA}^2 \times 10^3$ ) for **7**.

| Atom | x        | y         | z        | U(e)  |
|------|----------|-----------|----------|-------|
| H4   | -3061.69 | 8089.26   | 4159.19  | 18    |
| H6A  | 1781.52  | 6704.3    | 6433.2   | 20    |
| H6B  | -392.07  | 6859.46   | 6038.18  | 20    |
| H7   | 4144.49  | 7688.11   | 4949.61  | 21    |
| H3A  | -4962.29 | 9088.52   | 2275.16  | 20    |
| H3B  | -3822.26 | 9833.95   | 1324.34  | 20    |
| H1A  | 200(40)  | 11070(40) | 1042(19) | 25(6) |
| H1B  | 1070(40) | 8800(40)  | 1101(17) | 15(5) |

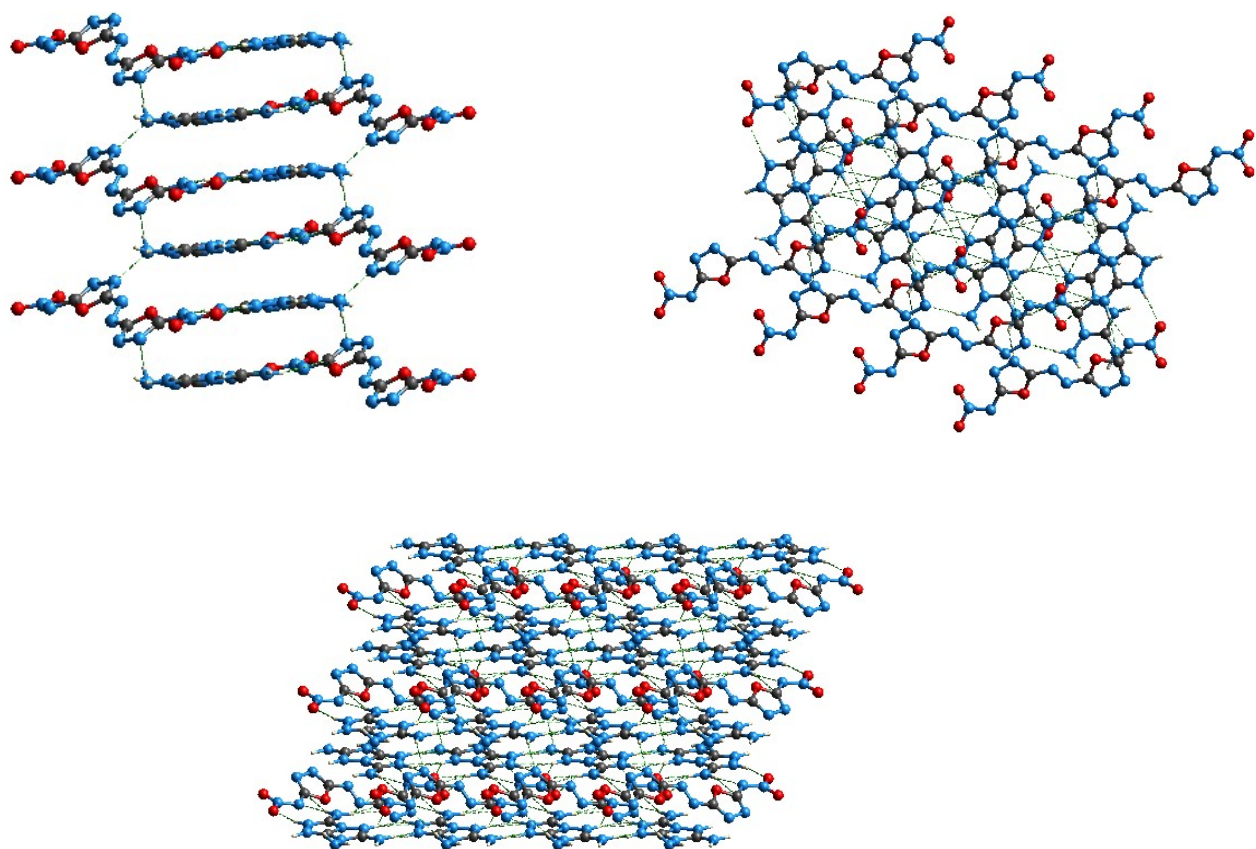

**Figure S8:** Packing diagram of compound **7**, (a) along the **a**-axis, (b) along the **b**-axis, (c) along the **c**-axis.

### **Resazurin-based cell viability assay.**

**HEK-293** cells (p# 37) were cultured in D1 complete media (DMEM supplemented with 10% FBS and 1% Penicillin-Streptomycin antibiotic solution) at 37 °C in a 5% CO<sub>2</sub> atmosphere. Then the cells were trypsinized, counted, and plated in 96-well clear, flat-bottom microplates (NEST), at a density of  $2.5 \times 10^3$  cells per well in 150  $\mu$ l DMEM complete medium and incubated for 24 hours at 37 °C in a 5% CO<sub>2</sub> incubator. After 24 h of incubation, cells were treated in triplicate with indicated test compounds at 50  $\mu$ M, 25  $\mu$ M, 12.5  $\mu$ M and 6.25  $\mu$ M concentrations, 0.05% DMSO (negative control) and 533 nM Doxorubicin (positive control) for 72 h in a CO<sub>2</sub> incubator. Cell viability was assessed after drug treatment using resazurin assay. Briefly, 1mg/mL solution of resazurin sodium (SRL) was prepared in 1X sterile PBS. Media from the wells with compounds was removed, wells were washed with 1X PBS once and a fresh DMEM media 100  $\mu$ L/well was added. Then, 600  $\mu$ L of 1mg/mL solution of resazurin was diluted with 9.4 mL DMEM culture media and 50  $\mu$ L was added to all wells making the final concentration of 0.02 mg/mL resazurin sodium per well. Plates were incubated at 37 Degree Celsius in 5% CO<sub>2</sub> incubator for 4 hours in dark. After incubation, the fluorescence intensity was measured using GloMax® Explorer (Promega) instrument with 520 nm excitation and 580-640 nm emission filter. Percentage cell viability was calculated as ((fluorescence of treated cells- fluorescence of media control)/fluorescence of DMSO treated cells- fluorescence of media control)\*100. Graphs were plotted using Graphpad Prism 8 software.

## NMR, IR, Mass Spectra, and DSC plots

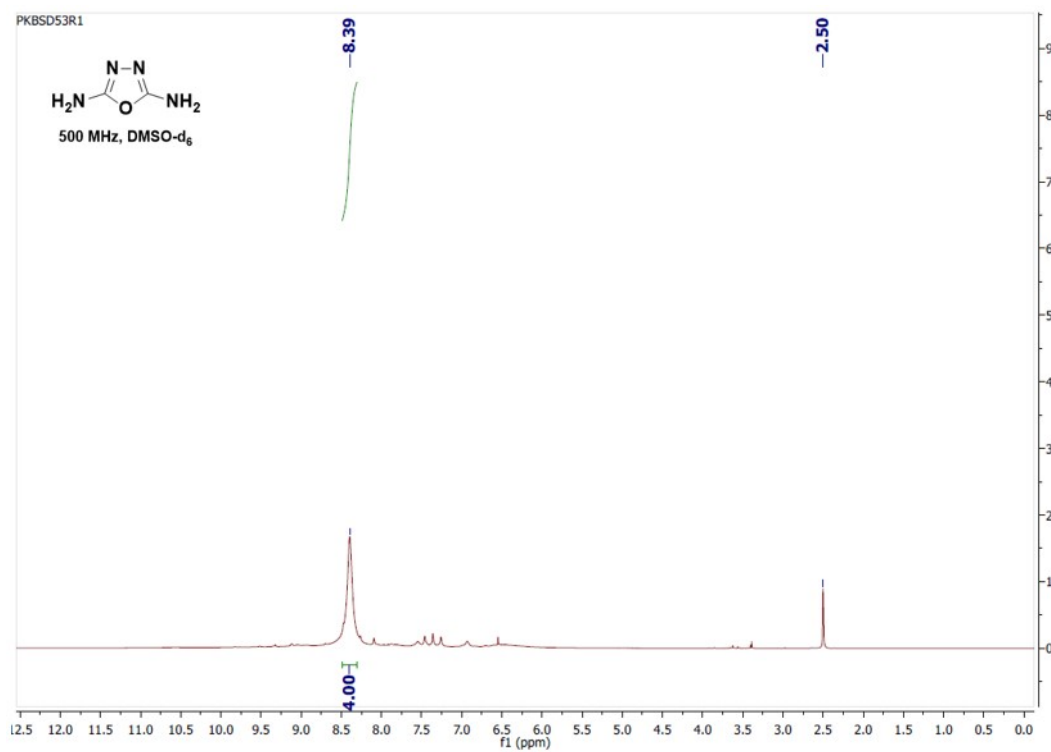

Fig.S9: <sup>1</sup>H NMR Spectra of 1,3,4-oxadiazole-2,5-diamine (1)

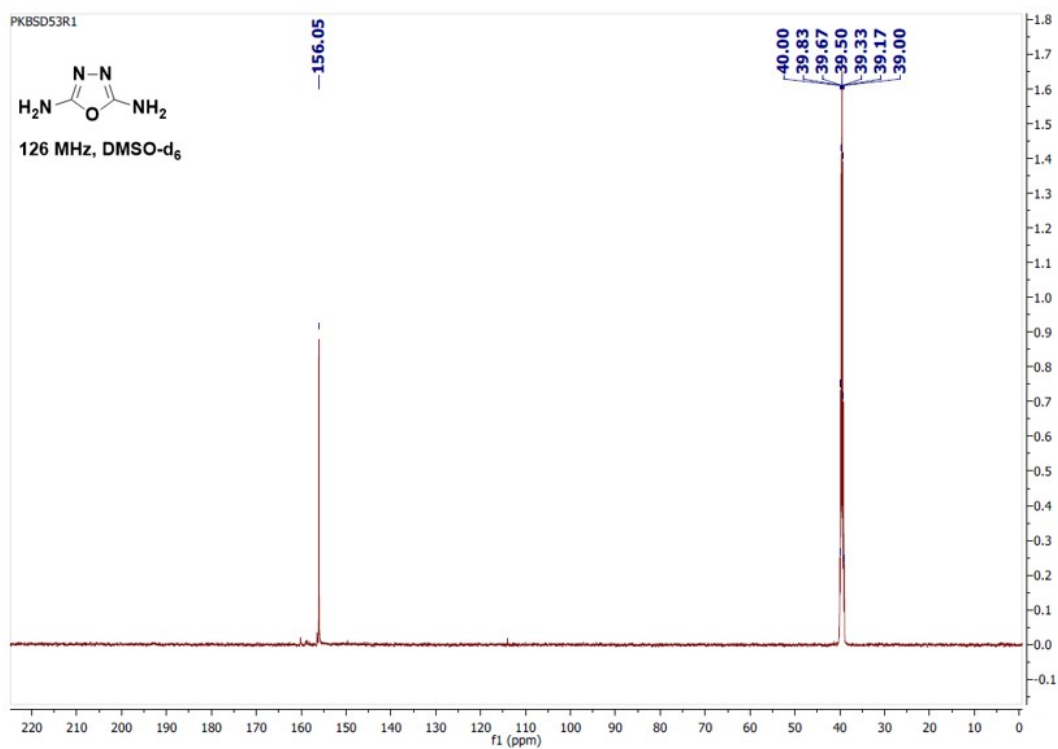

Fig.S10: <sup>13</sup>C NMR Spectra of 1,3,4-oxadiazole-2,5-diamine (1)



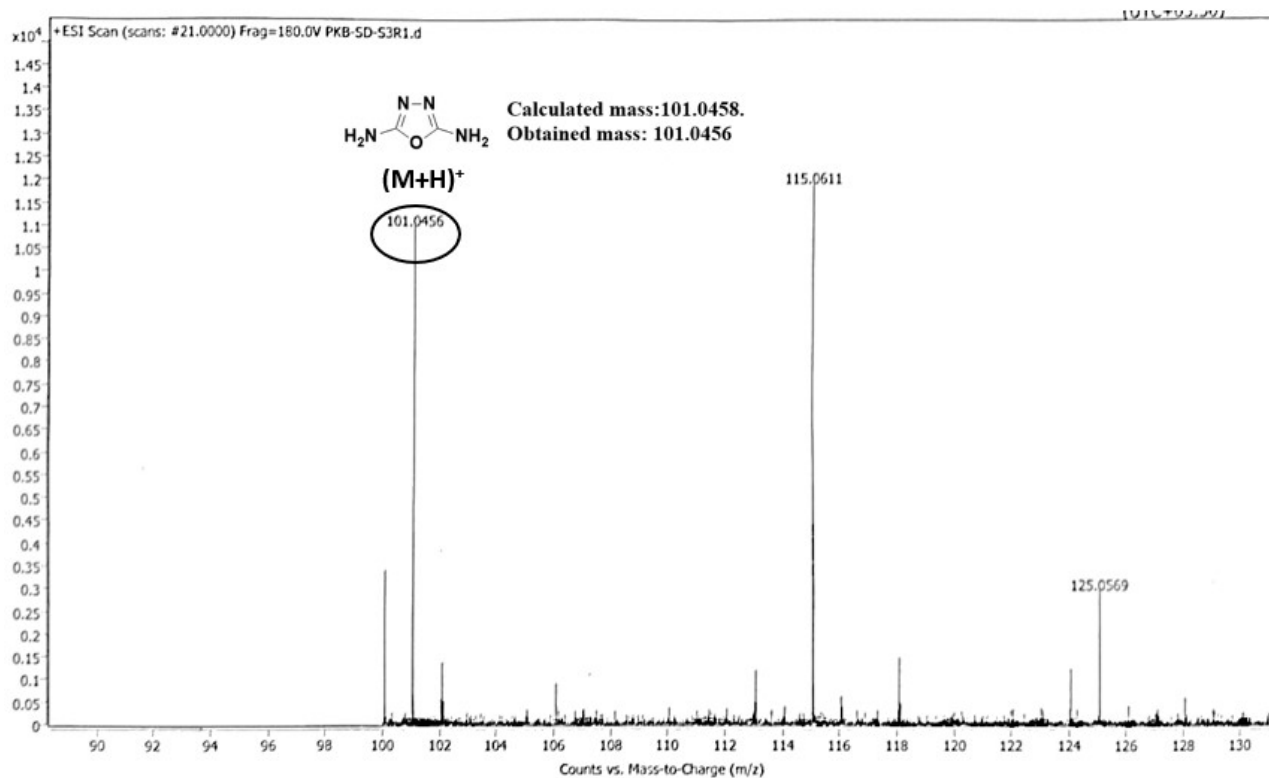

Fig.S11: Mass Spectra of Compound 1

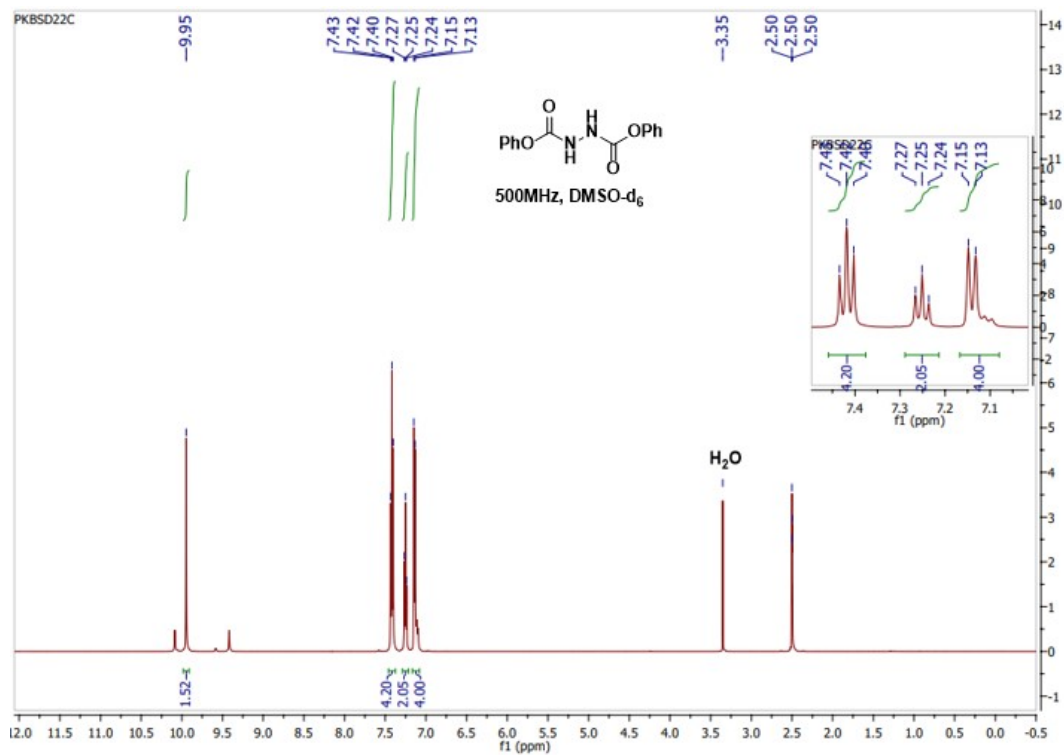

Fig.S12: <sup>1</sup>H NMR Spectra of Diphenyl hydrazodicarboxylate (diphenyl bicarbamate) (3b)

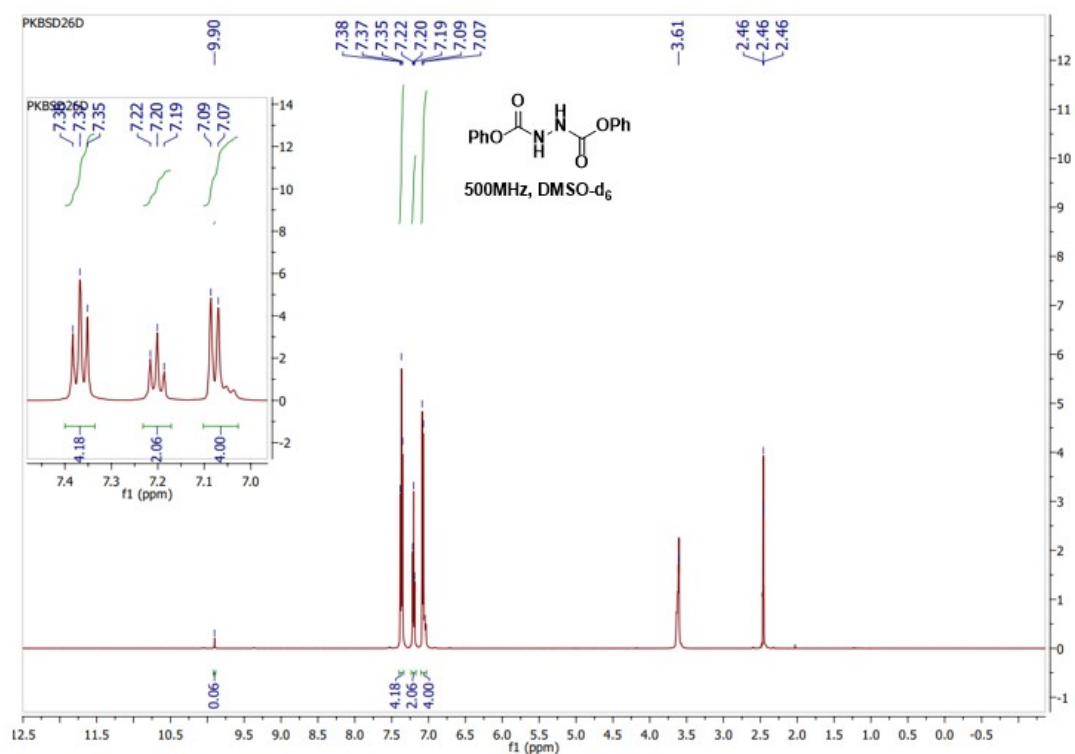

**Fig.S13: <sup>1</sup>H NMR Spectra of Diphenyl hydrazodicarboxylate (diphenyl bicarbamate) (3b) with D<sub>2</sub>O**

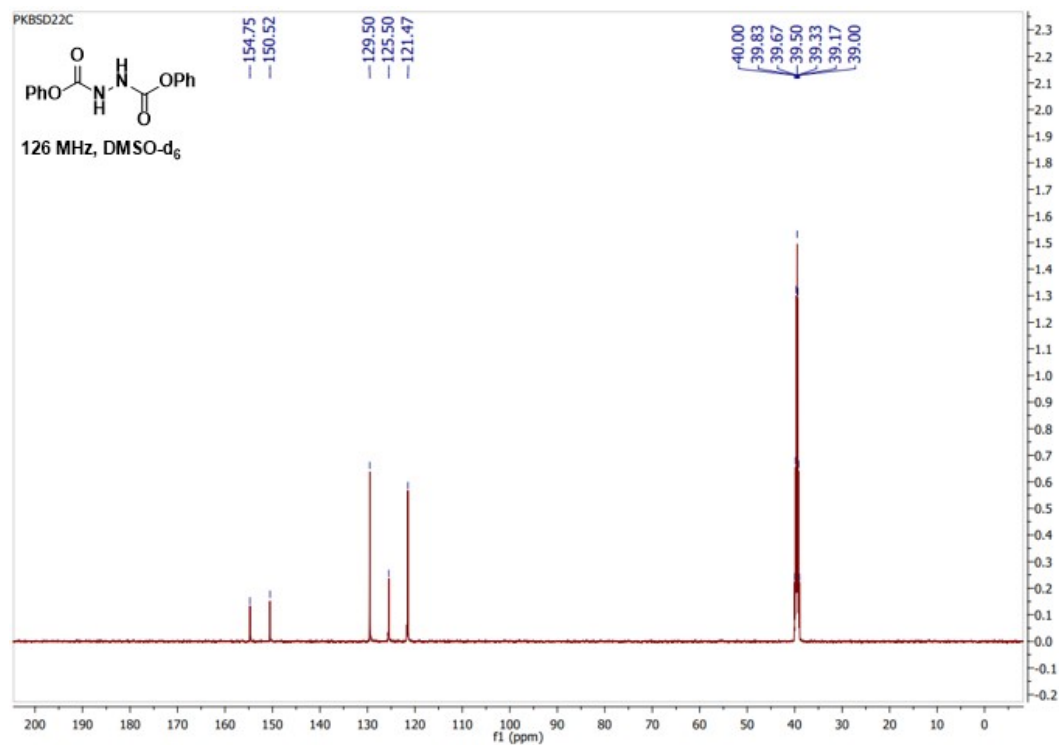

**Fig.S14: <sup>13</sup>C NMR Spectra of Diphenyl hydrazodicarboxylate (diphenyl bicarbamate) (3b).**

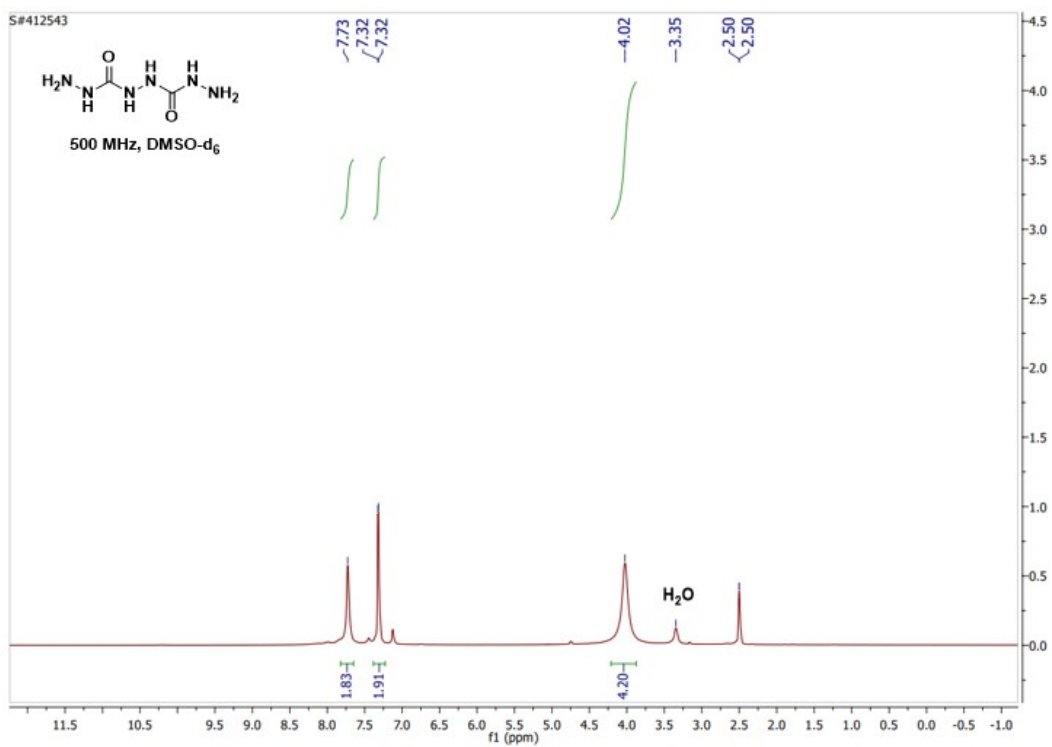

Fig.S15: <sup>1</sup>H NMR Spectra of Compound 3

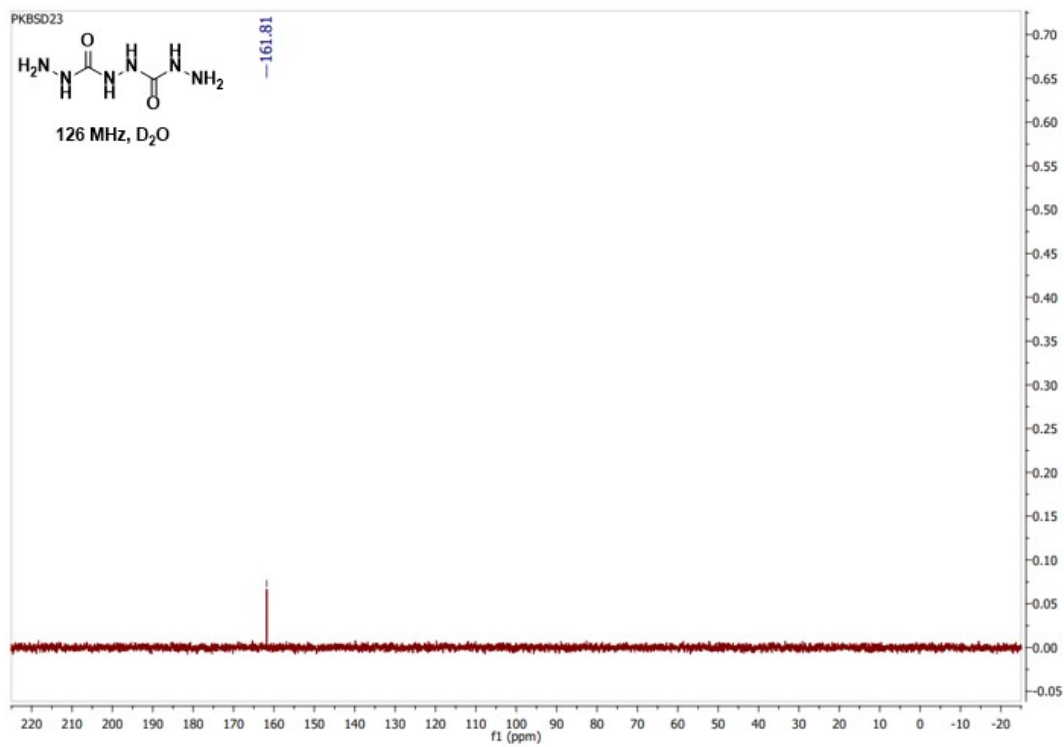

Fig.S16: <sup>13</sup>C NMR Spectra of Compound 3

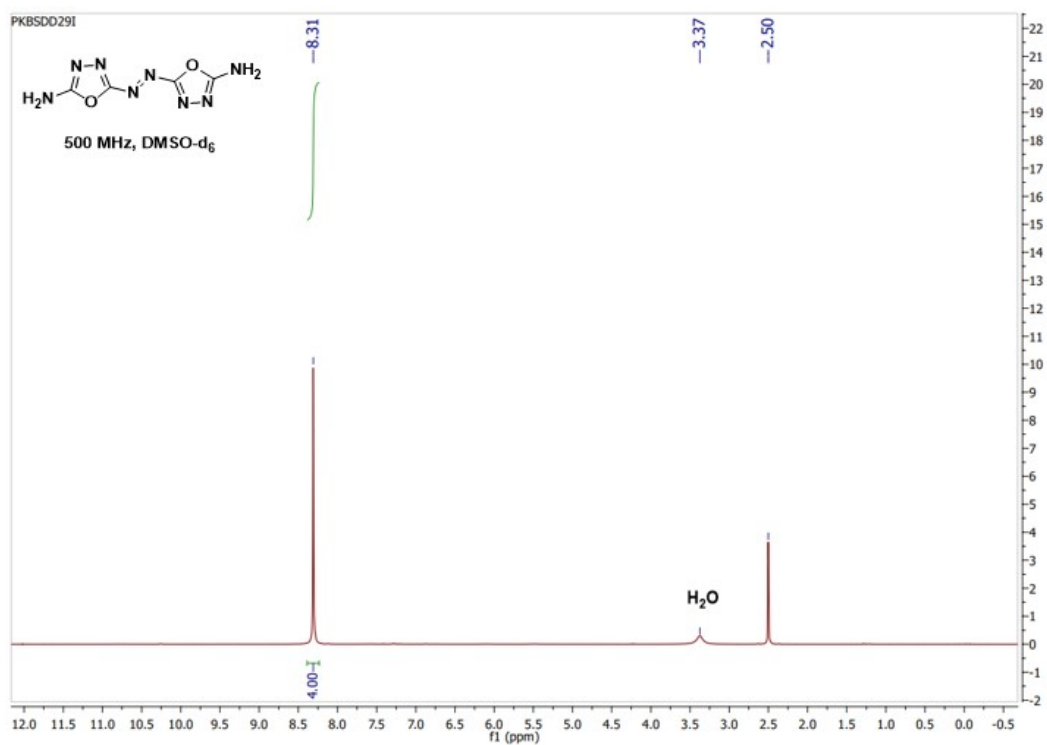

Fig.S17: <sup>1</sup>H NMR Spectra of Compound 4

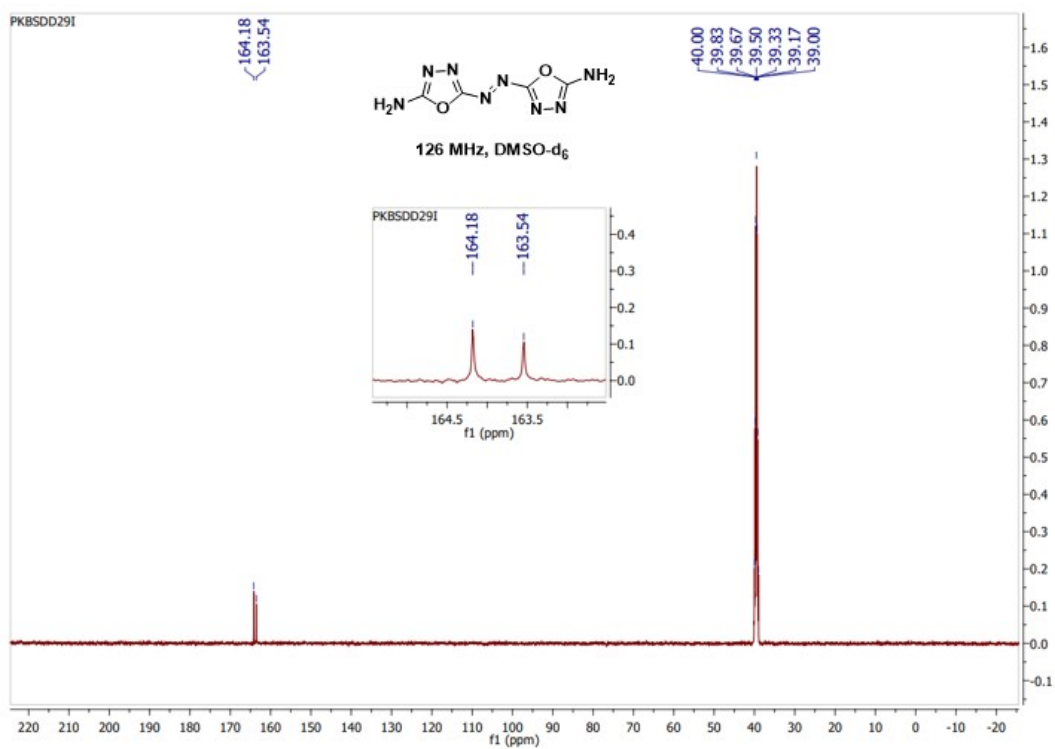

Fig.S18: <sup>13</sup>C NMR Spectra of Compound 4

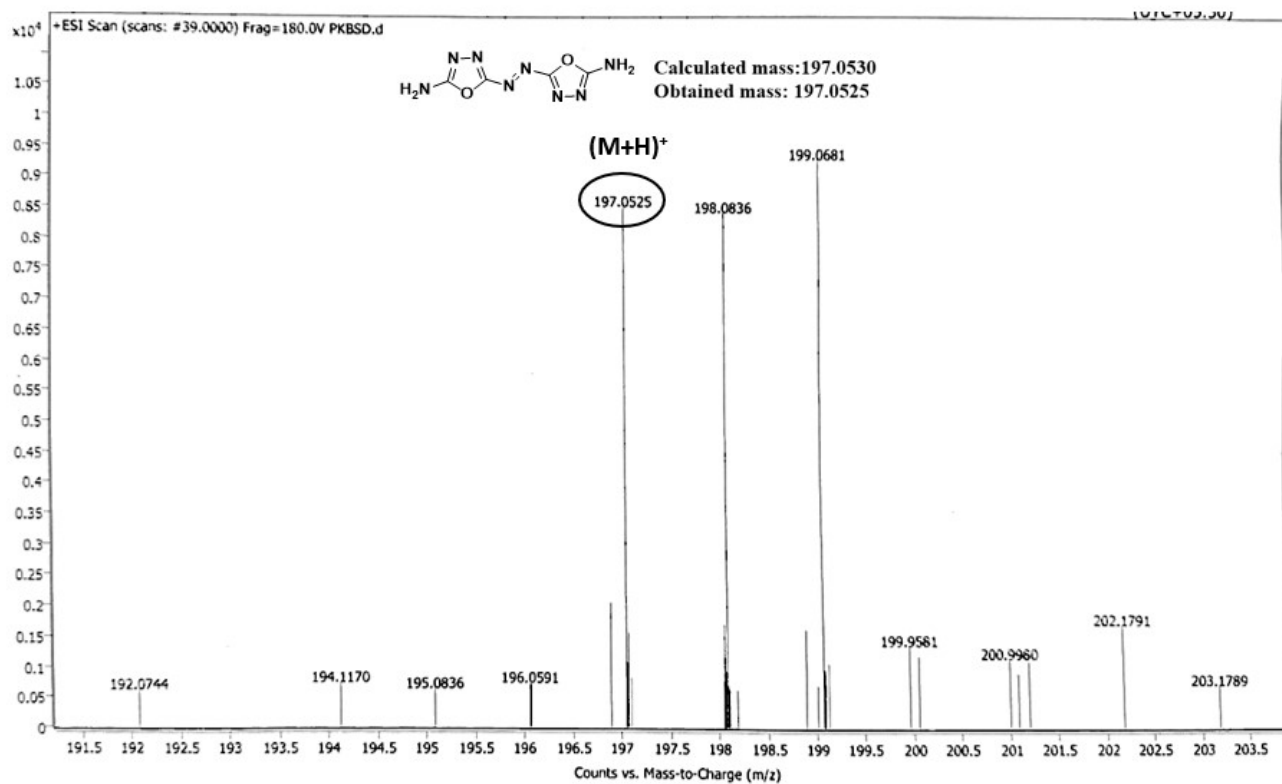

Fig.S19: Mass Spectra of Compound 4

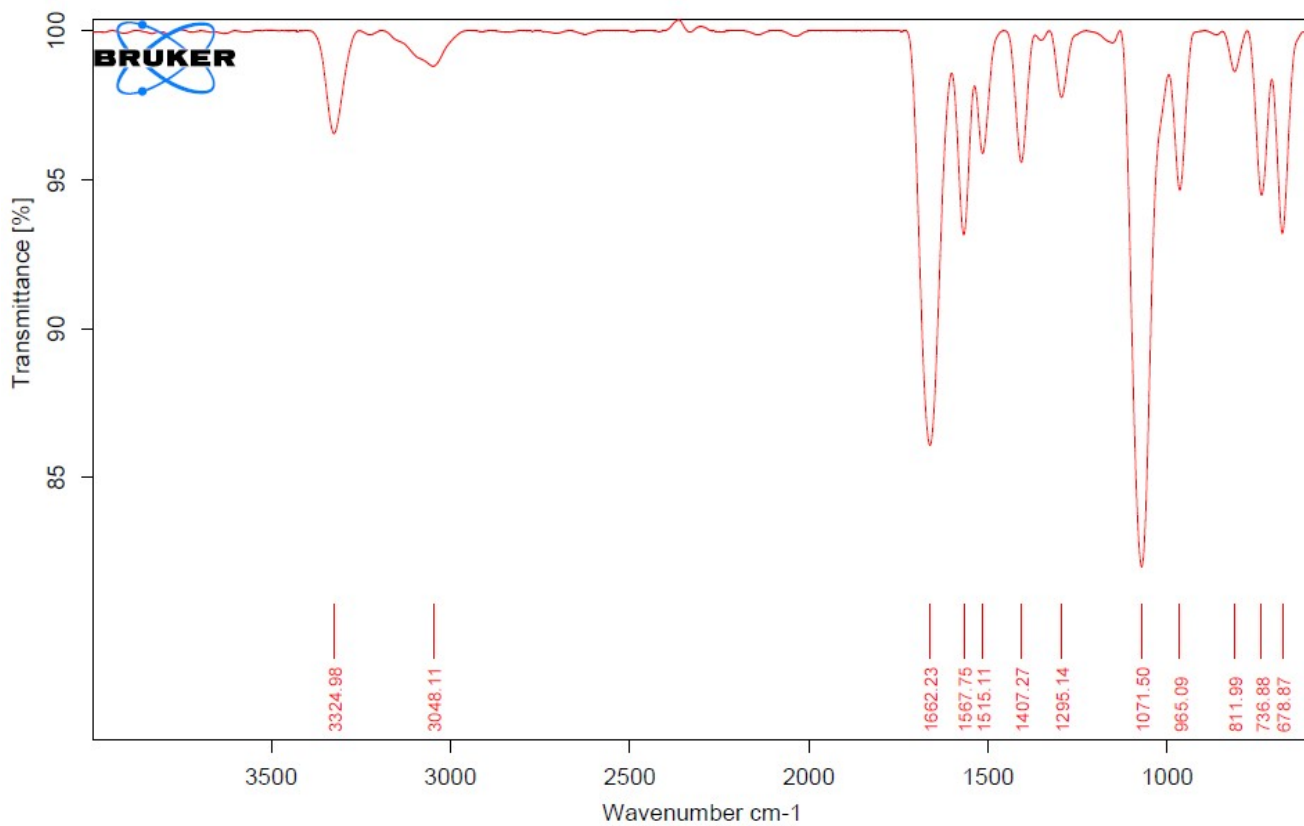

Fig.S20: IR Spectrum of Compound 4.

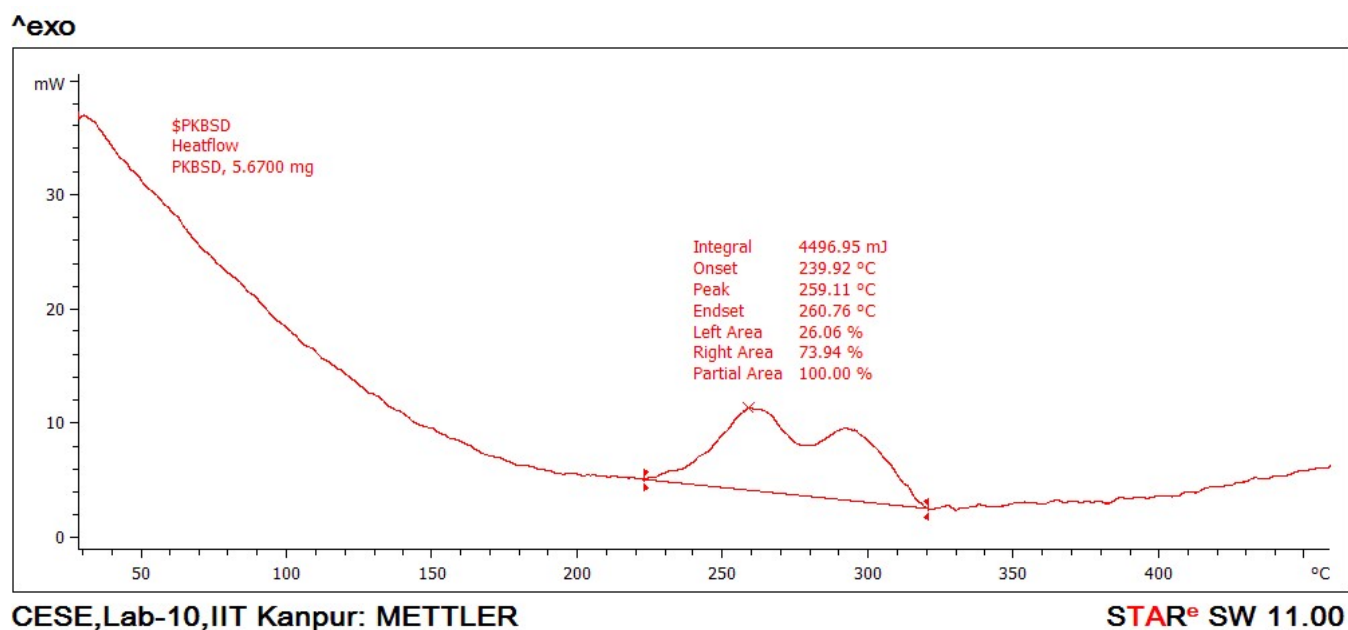

**Fig S21. DSC Plot of Compound 4 at the Heating rate 5 °C min<sup>-1</sup>.**

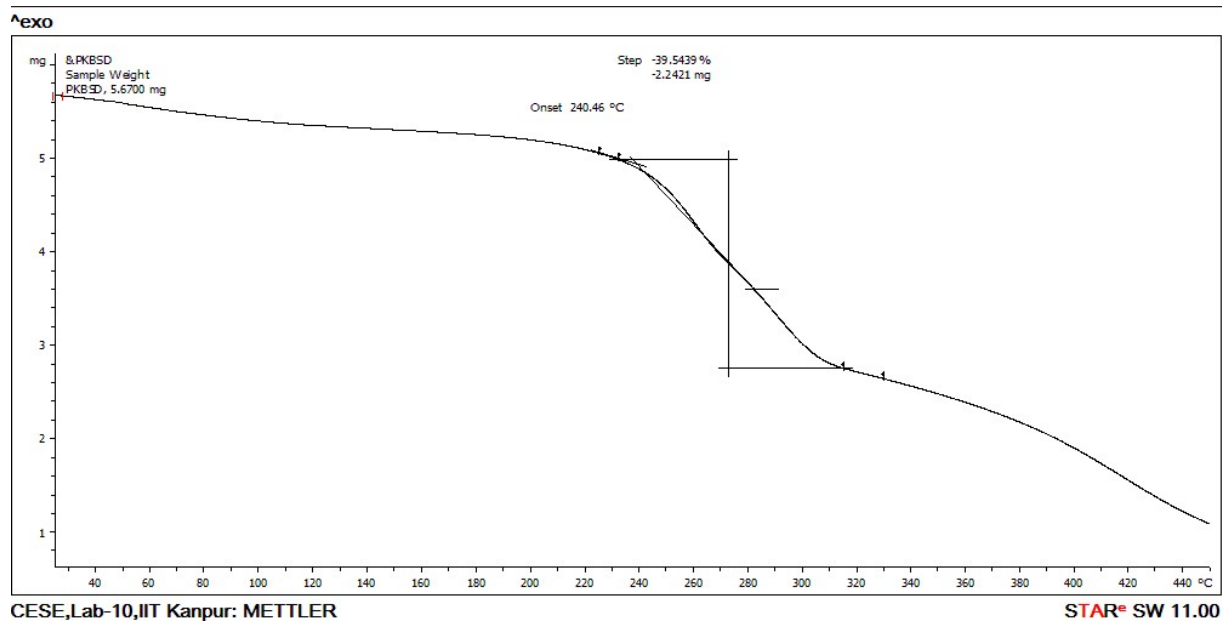

**Fig S22. TGA curve of Compound 4 at the Heating rate 5 °C min<sup>-1</sup>.**

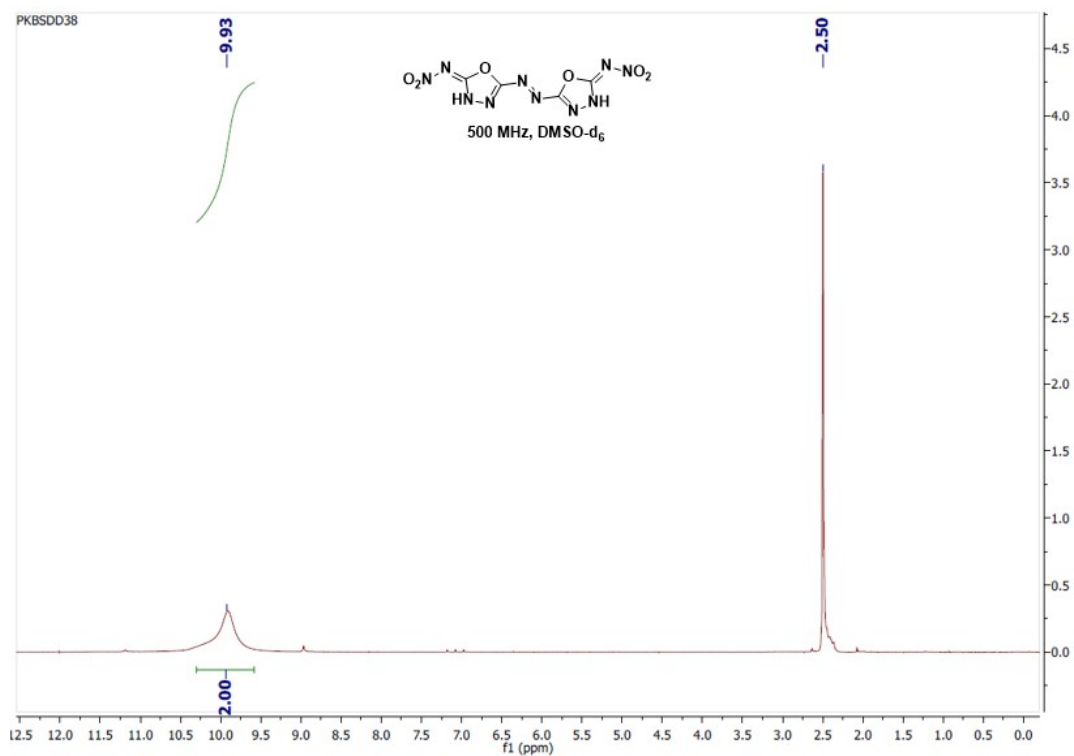

Fig.S23: <sup>1</sup>H NMR Spectra of Compound 5.

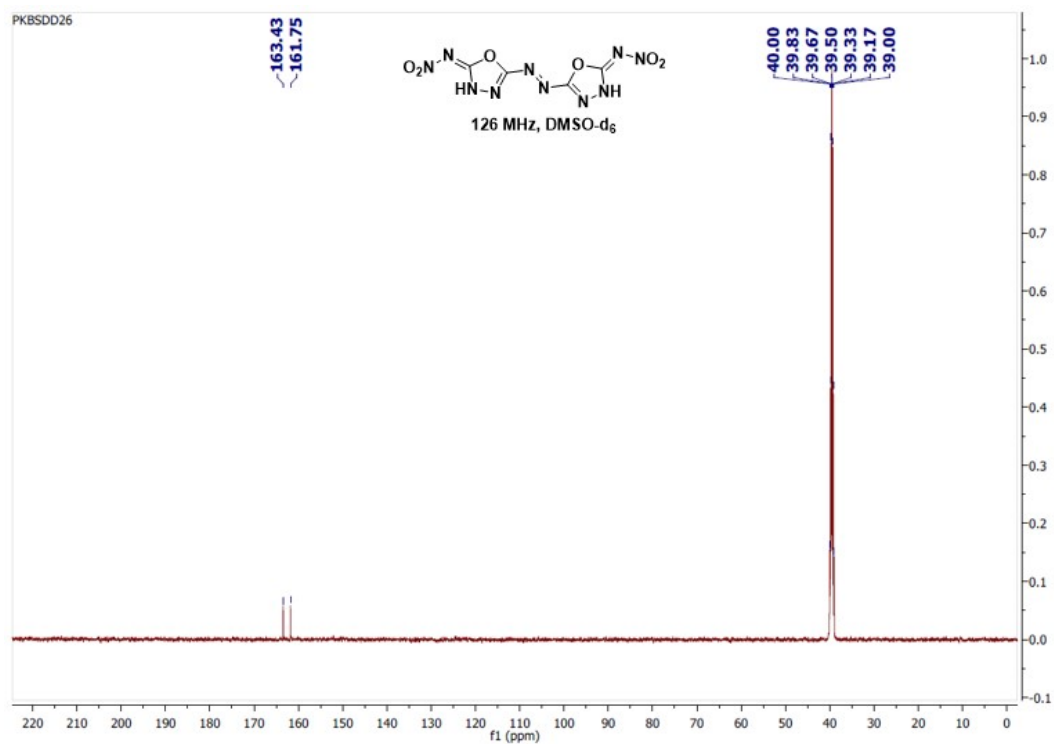

Fig.S24: <sup>13</sup>C NMR Spectra of Compound 5.

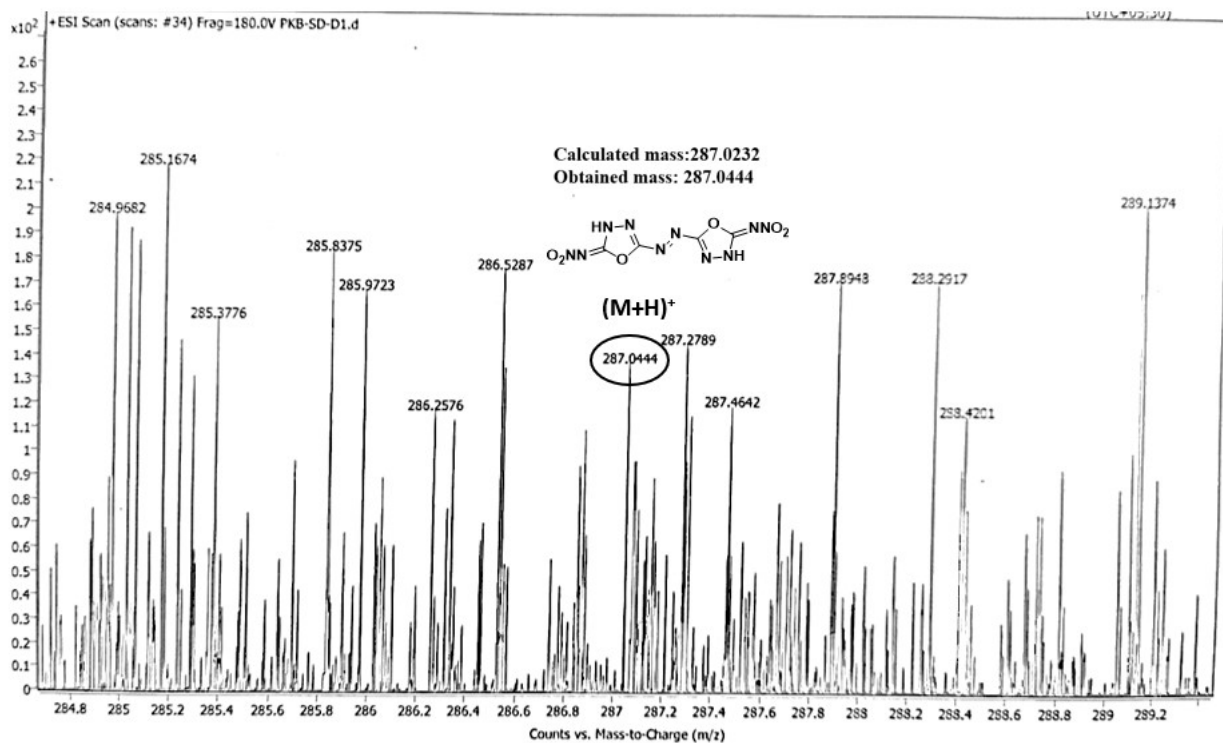

Fig.S25: Mass Spectra of Compound 5.

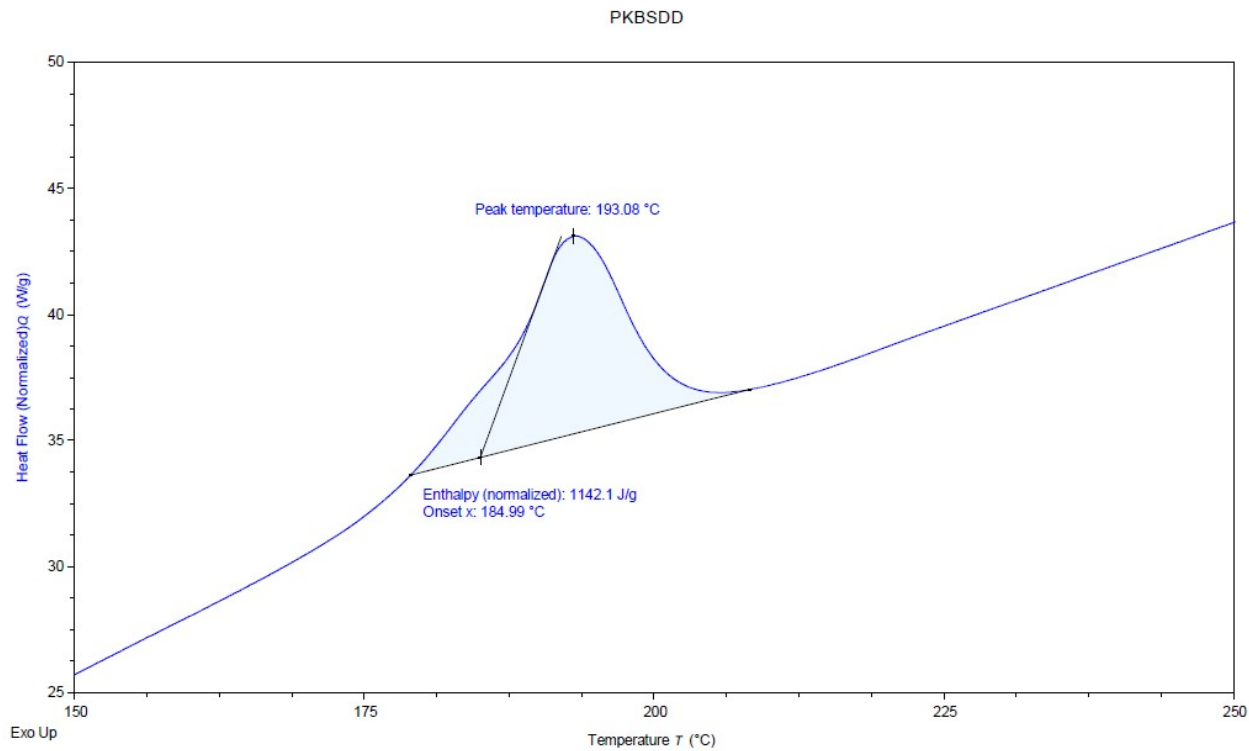

TA Instruments Trios V5.5.0.323

Fig S26. DSC Plot of Compound 5 at the Heating rate 5 °C min<sup>-1</sup>.



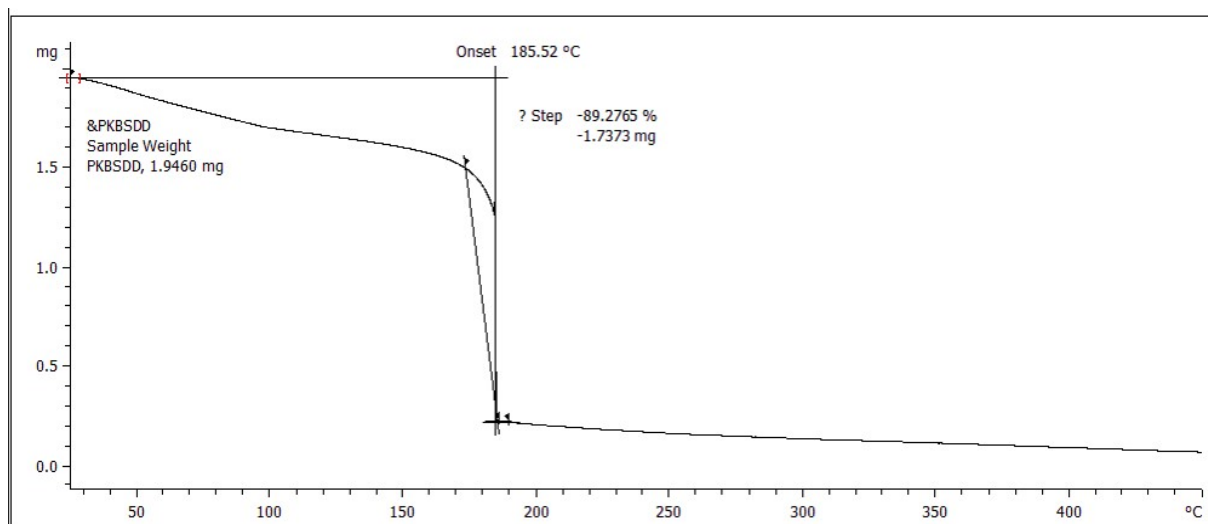

**Fig S27. TGA Curve of Compound 5 at the Heating rate 5 °C min<sup>-1</sup>.**

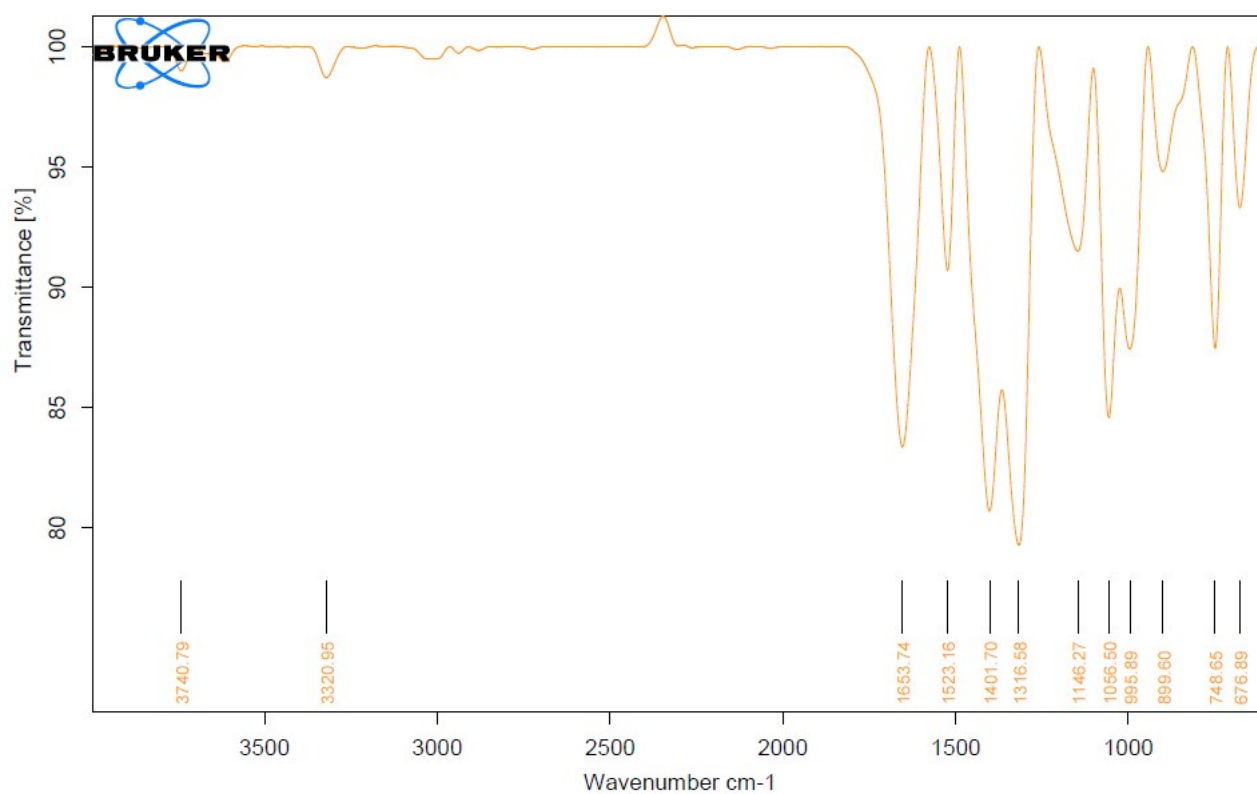

**Fig.S28: IR Spectrum of Compound 5.**

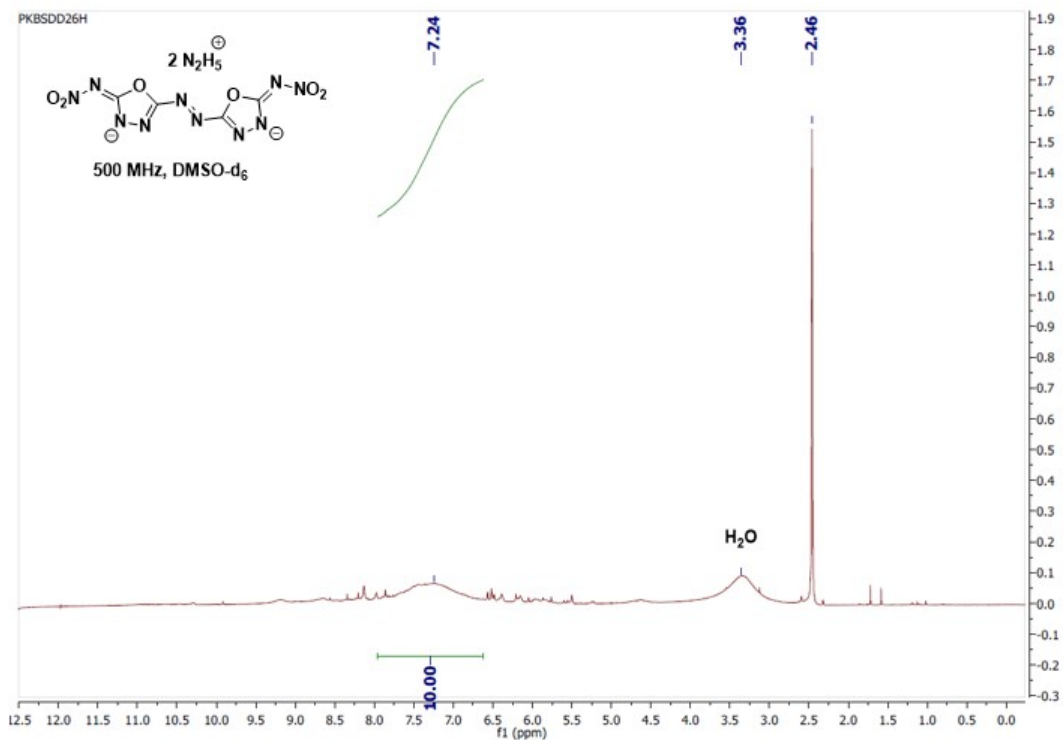

Fig.S29: <sup>1</sup>H NMR Spectra of Compound 6

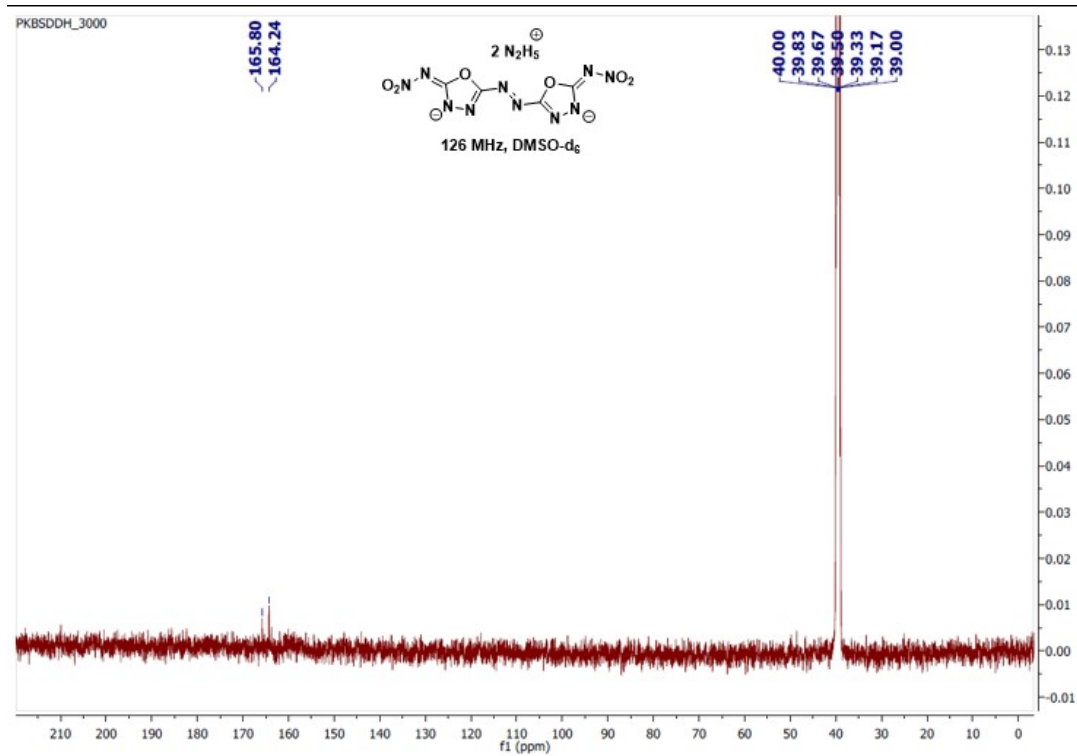

Fig.S30: <sup>13</sup>C NMR Spectra of Compound 6

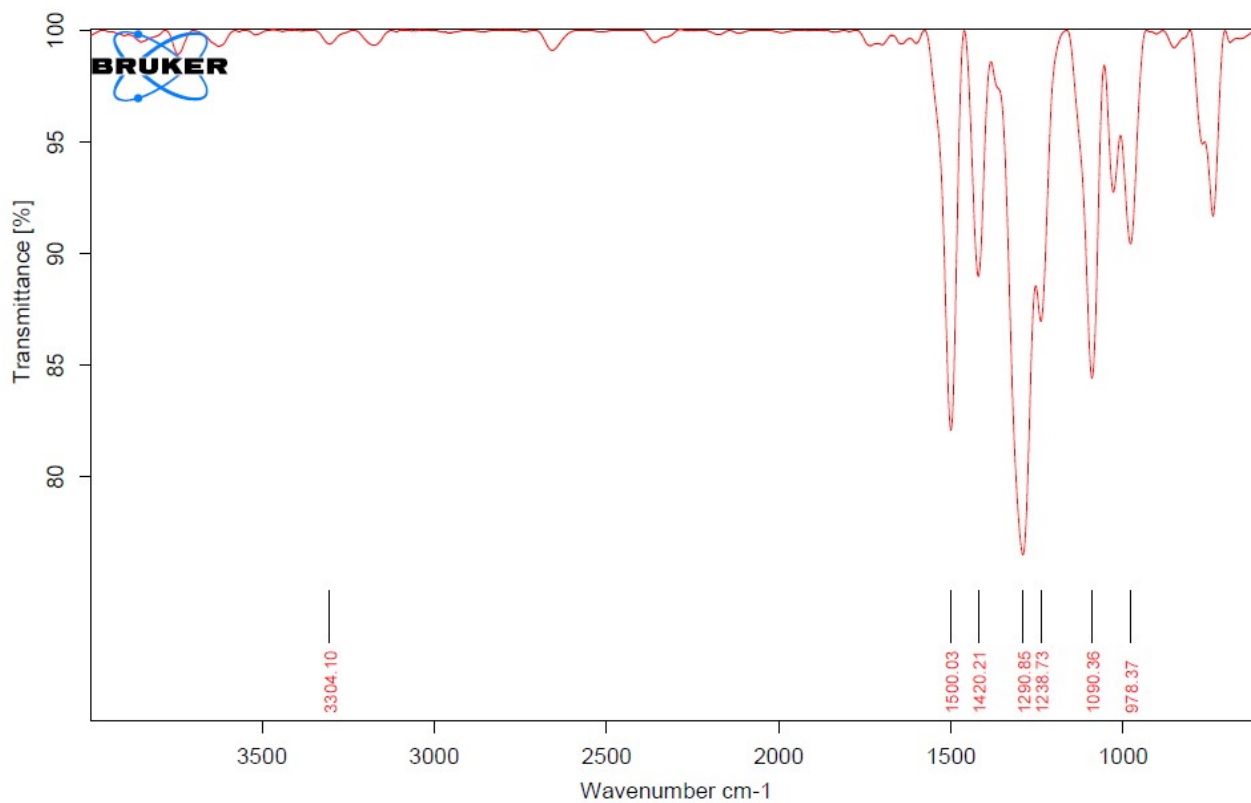

Fig.S31: IR Spectrum of Compound 6.

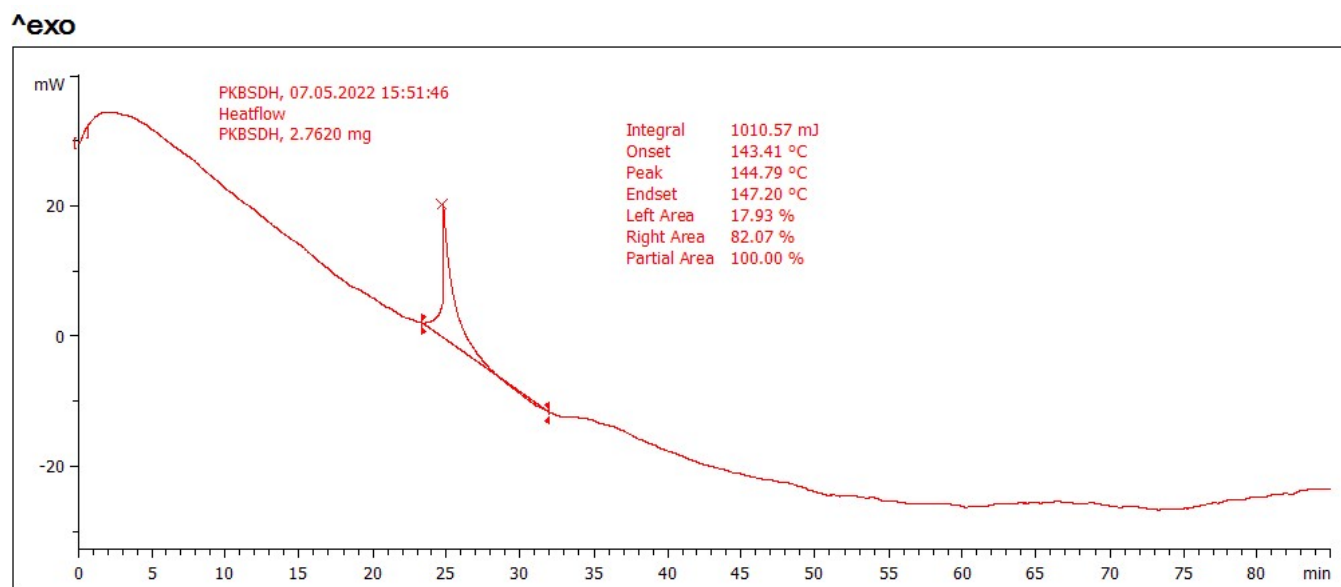

CESE, Lab-10, IIT Kanpur: METTLER

STAR<sup>e</sup> SW 11.00

Fig S32. DSC Plot of Compound 6 at the Heating rate 5 °C min<sup>-1</sup>.

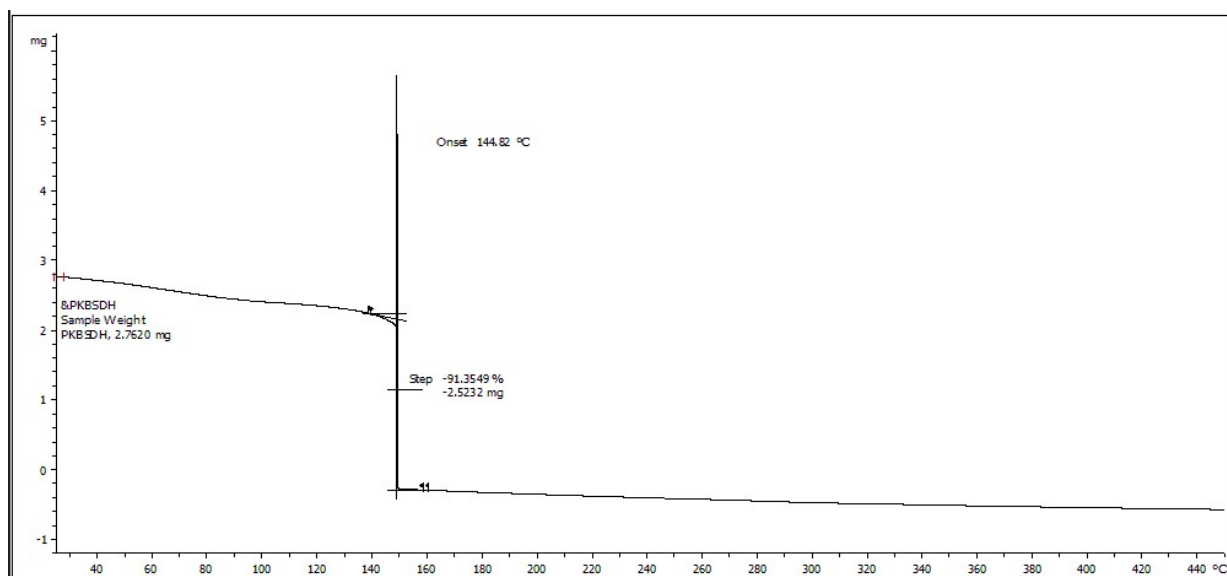

Fig S33. TGA curve of Compound 6 at the Heating rate 5 °C min<sup>-1</sup>.

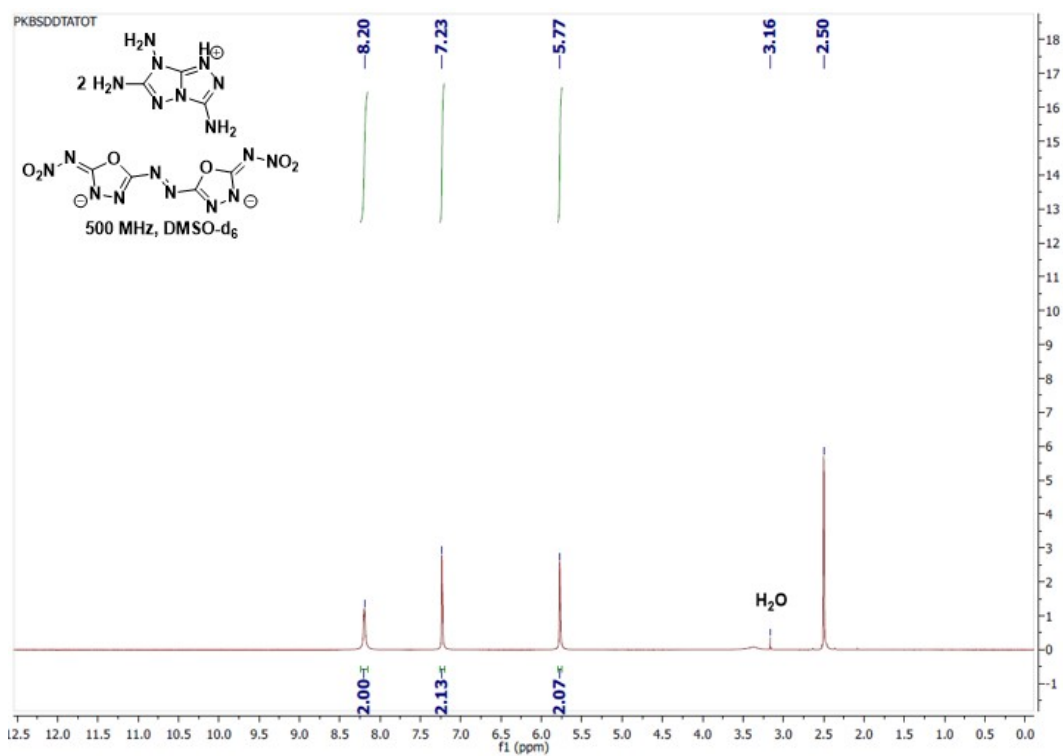

Fig.S34: <sup>1</sup>H NMR Spectra of Compound 7

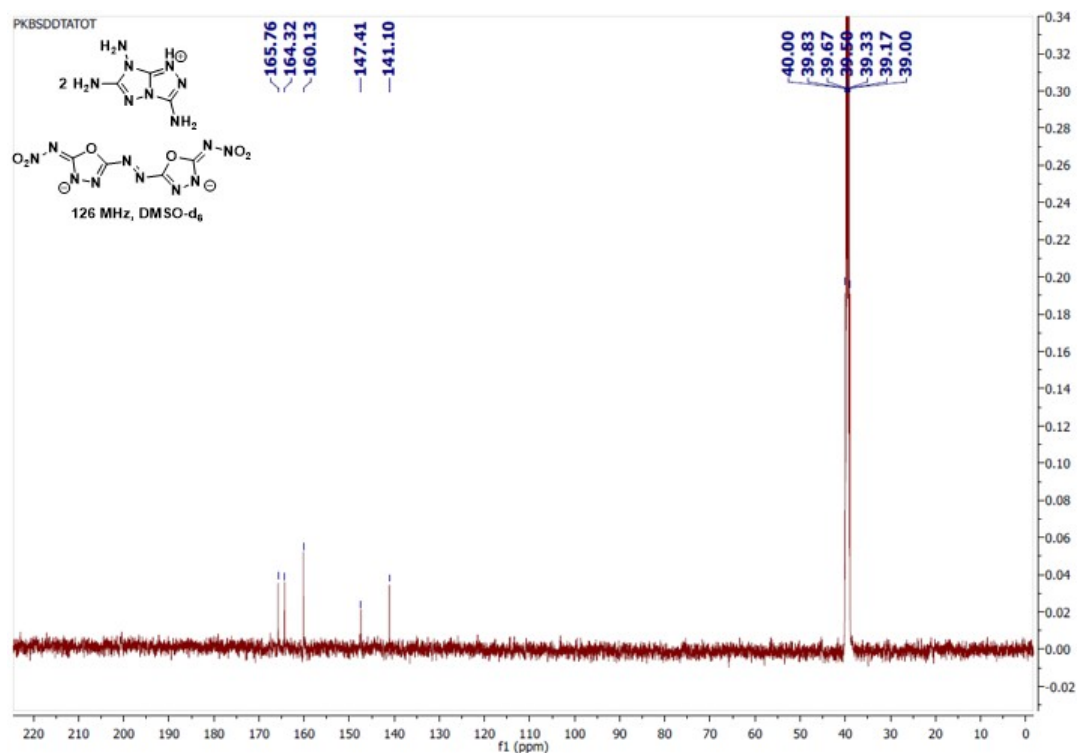

Fig.S35: <sup>13</sup>C NMR Spectra of Compound 7

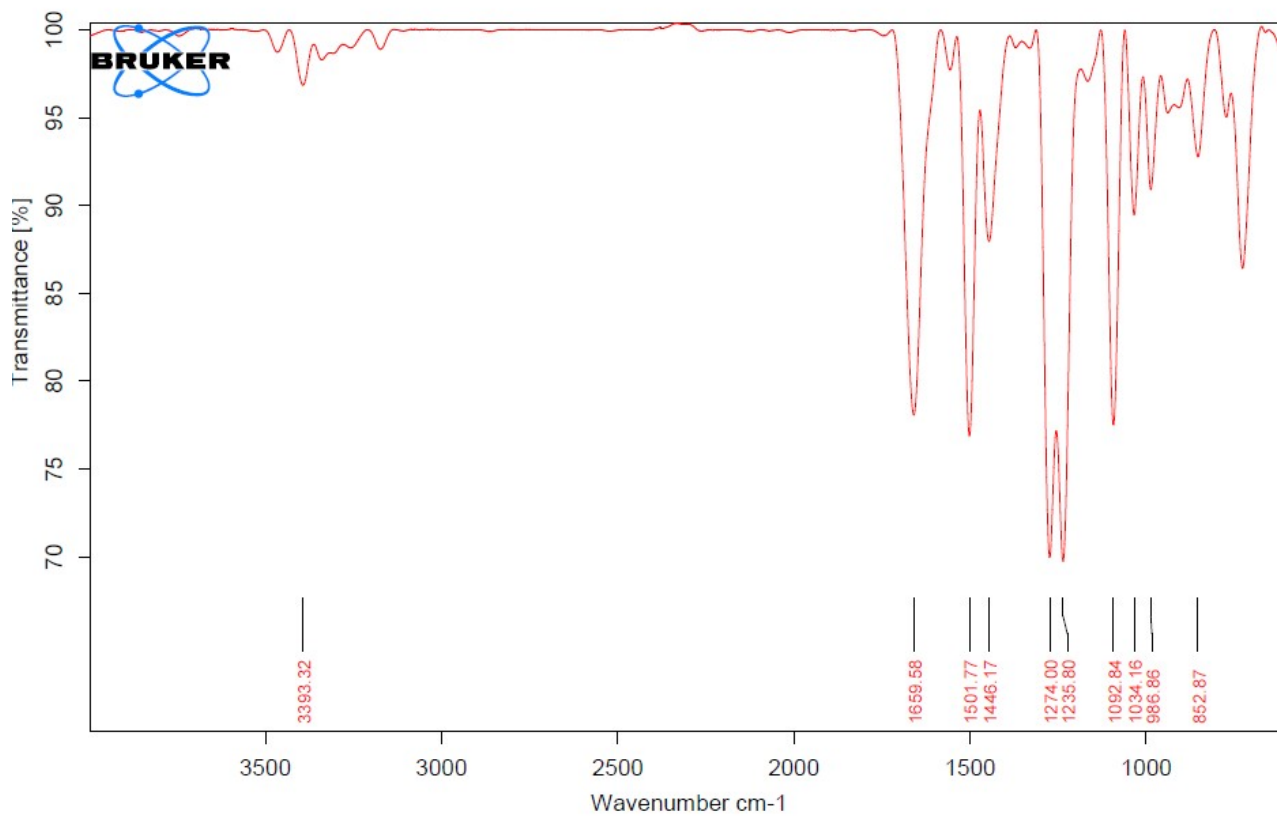

Fig.S36: IR Spectrum of Compound 7.

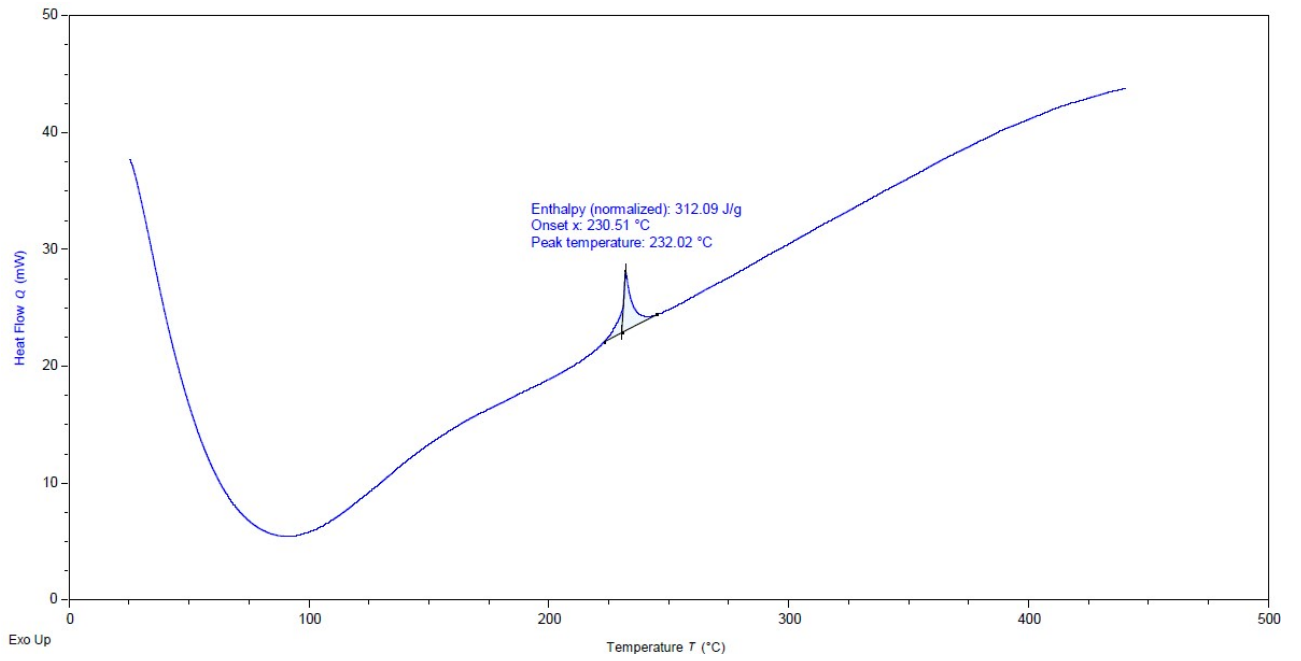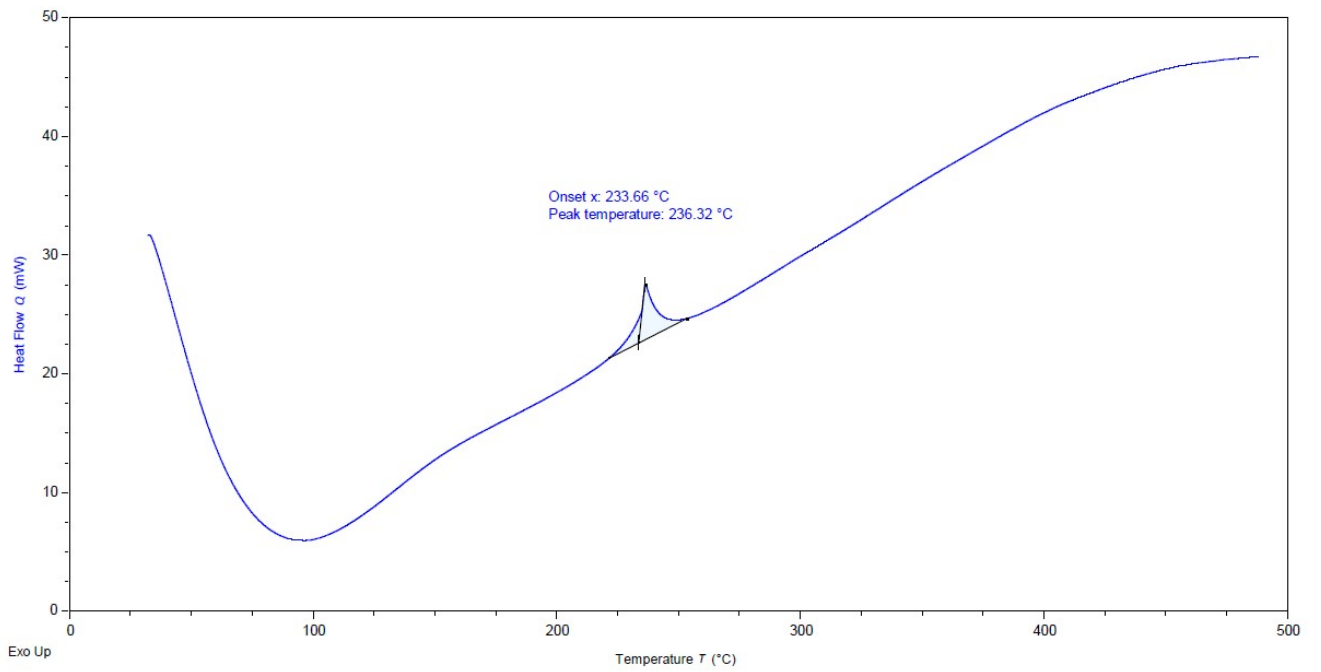

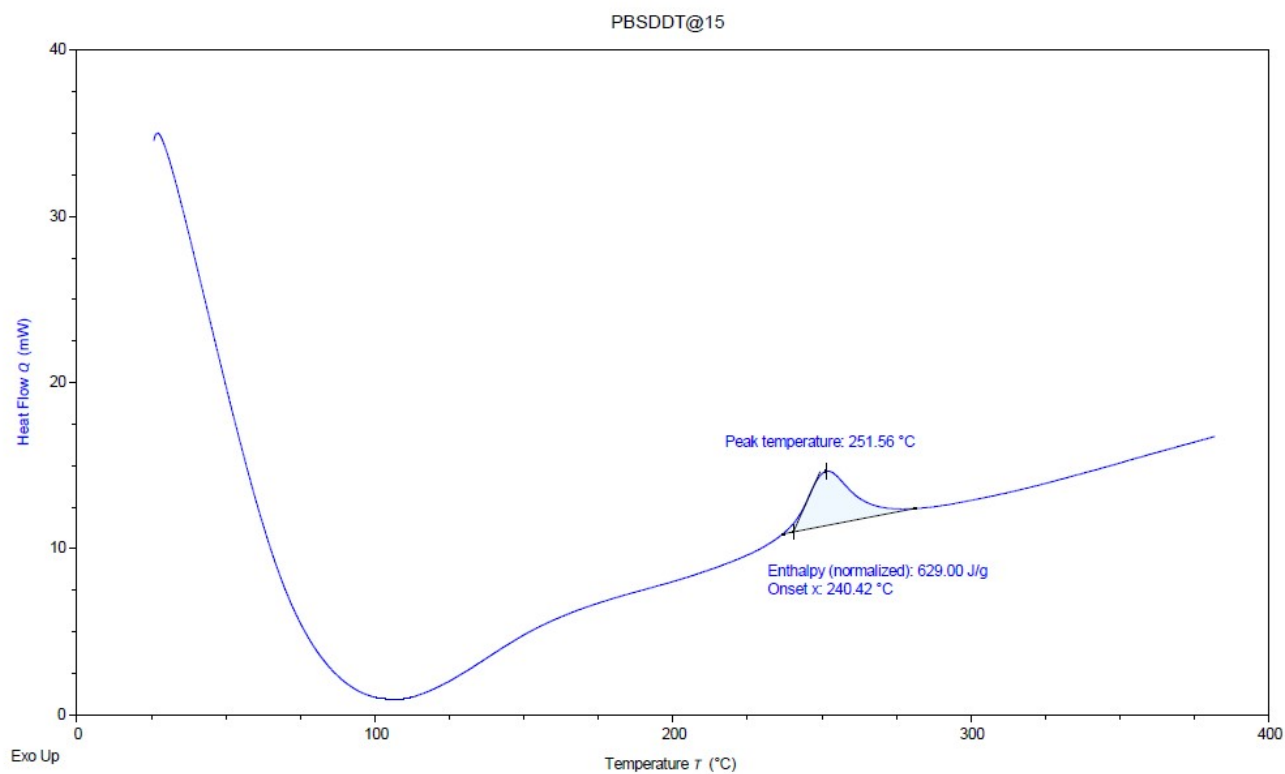

TA Instruments Trios V5.5.0.323

**Fig S37. DSC Plot of Compound 7 at the Heating rate 5, 10 and 15 °C min<sup>-1</sup> respectively.**

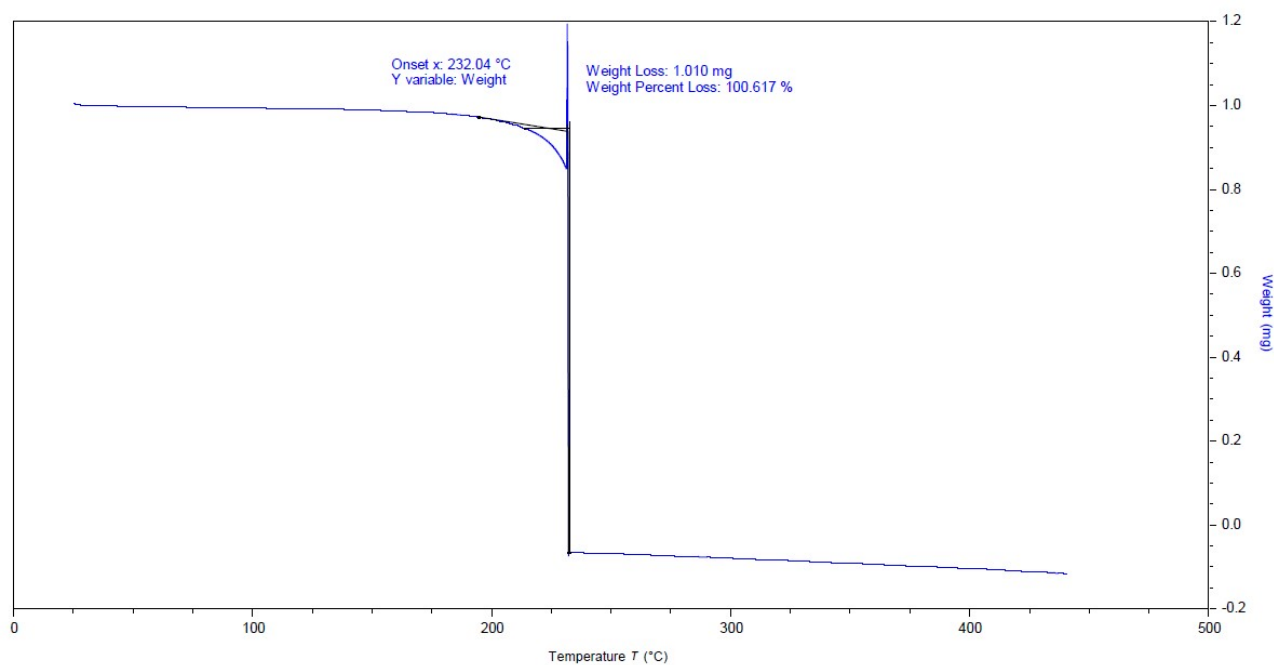

**Fig S38. TGA Curve of Compound 7 at the Heating rate 5 °C min<sup>-1</sup>.**

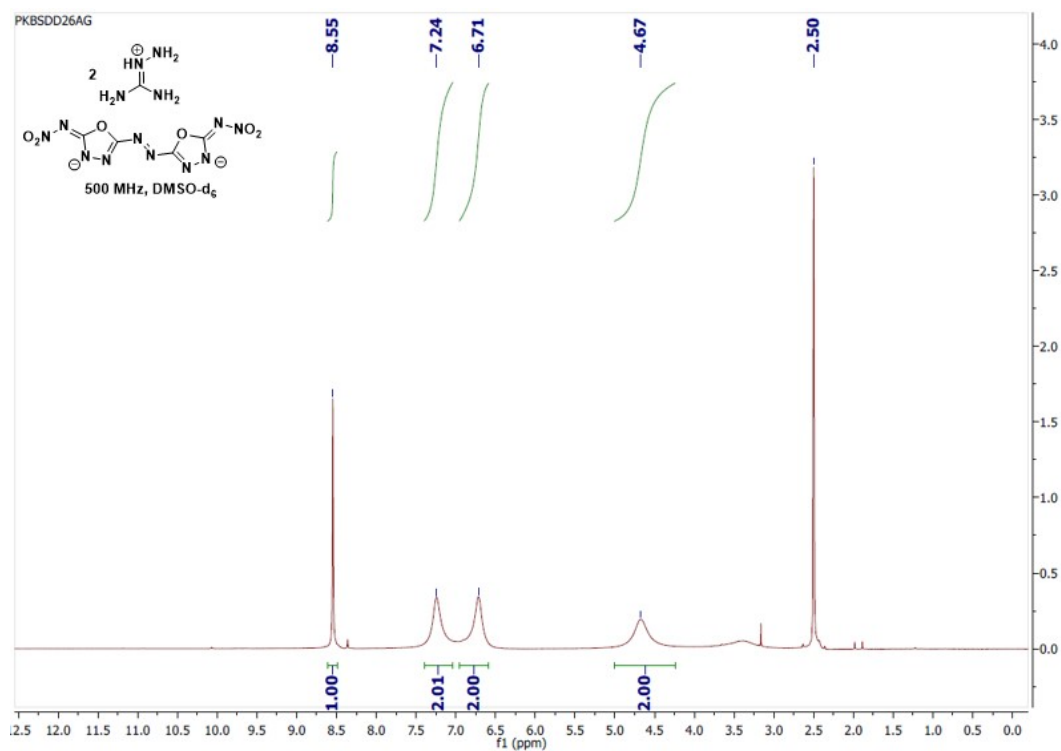

Fig.S39: <sup>1</sup>H NMR Spectra of Compound 8

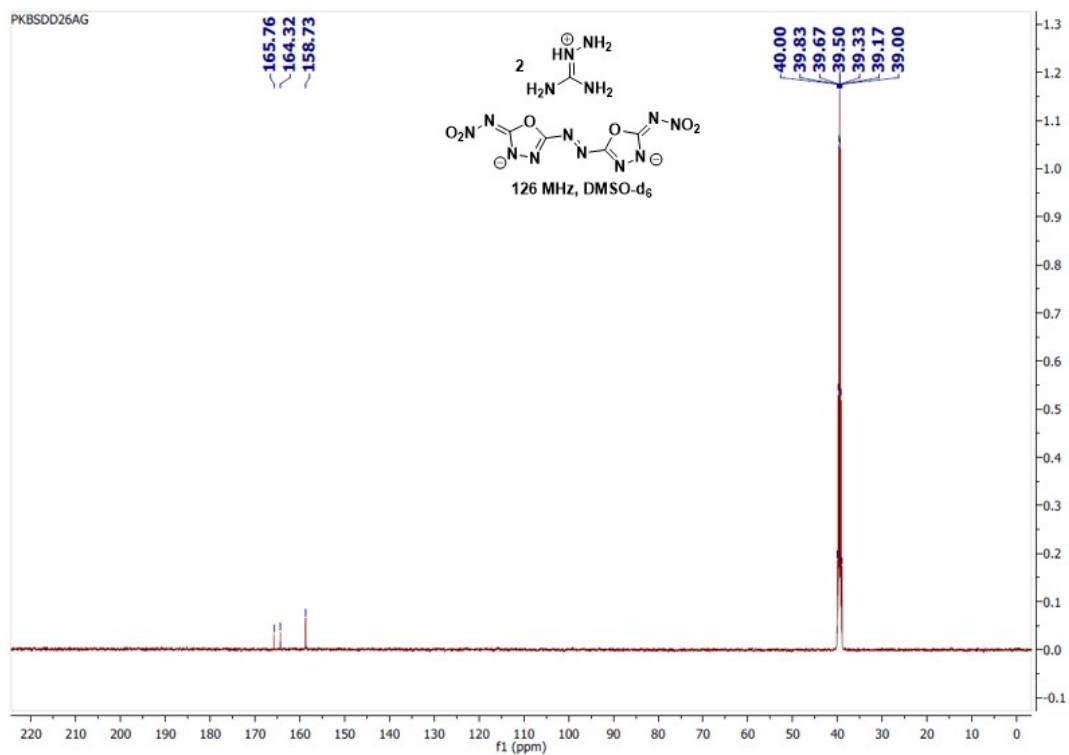

Fig.S40: <sup>13</sup>C NMR Spectra of Compound 8



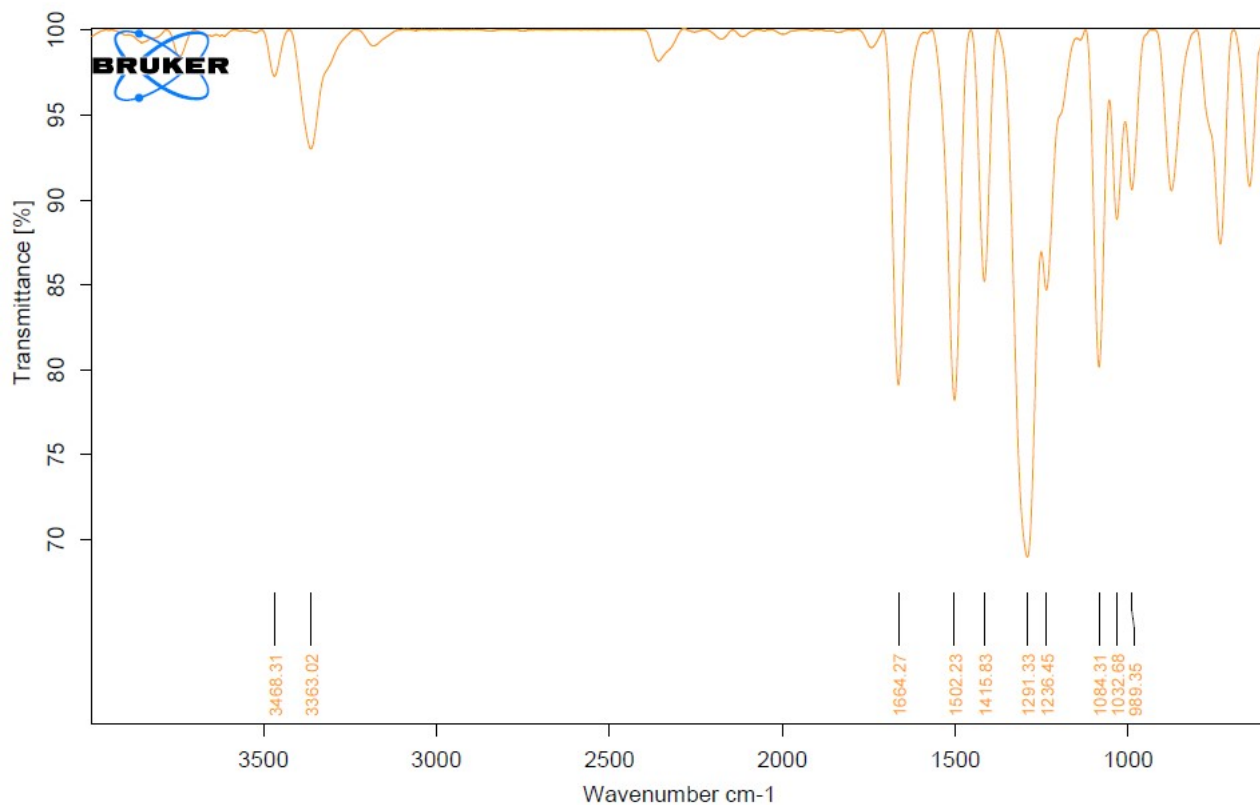

**Fig.S41: IR Spectrum of Compound 8.**

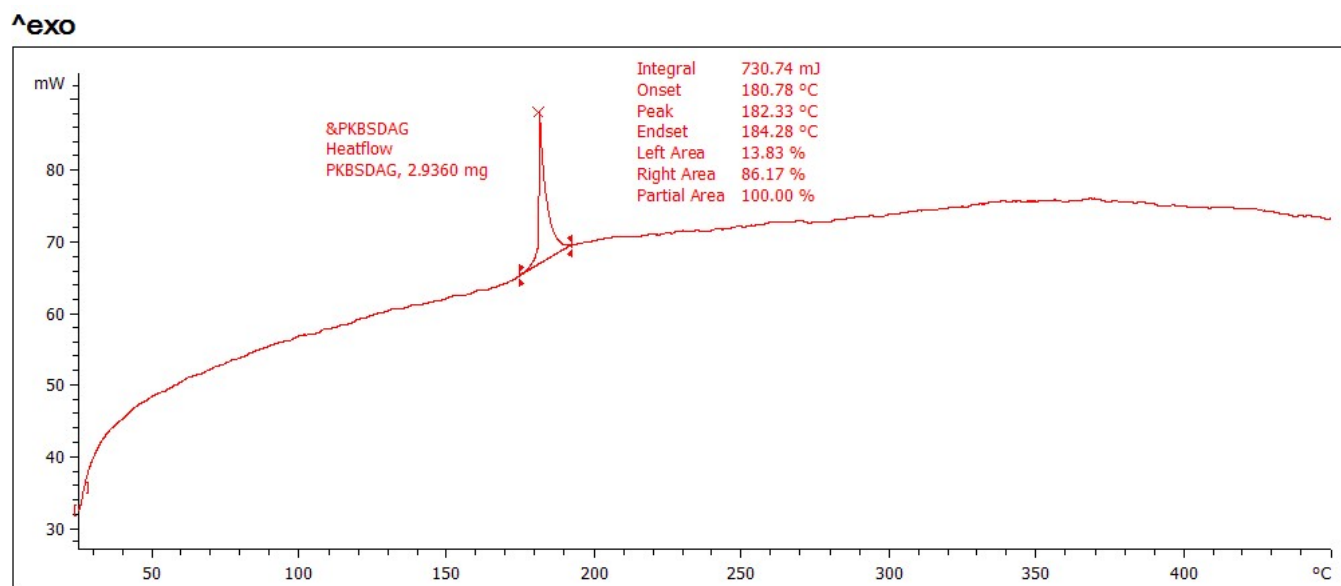

CESE, Lab-10, IIT Kanpur: METTLER

STAR<sup>e</sup> SW 11.00

**Fig S42. DSC Plot of Compound 8 at the Heating rate 5 °C min<sup>-1</sup>.**

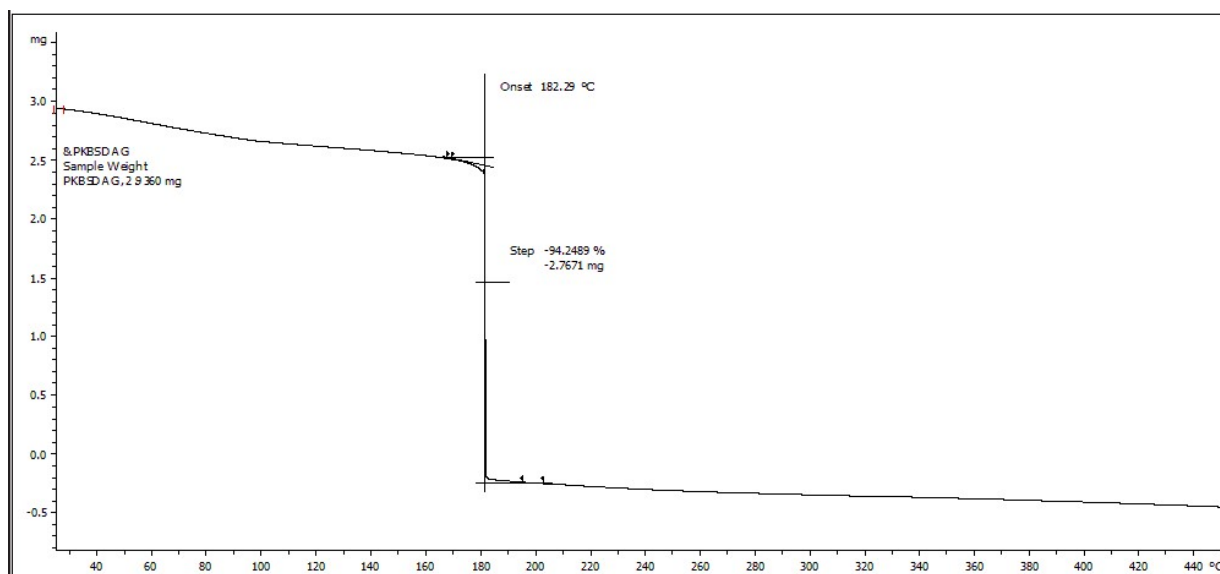

**Fig S43. DSC Plot of Compound 8 at the Heating rate 5 °C min<sup>-1</sup>.**

### Computational Details

Computations were carried out using the Gaussian 09 program suite.<sup>1</sup> The structure optimizations are performed with B3PW91 functional with 6-31G(d,p) basis set and characterized to be true local energy minima on the potential energy surface and no imaginary frequencies were found. Isodesmic reactions have been designed to predict the gas phase HOF ( $\text{HOF}_{\text{gas}}$ ) and shown in Figure S44. The total energies ( $E_0$ ), zero point correction (ZPE), thermal corrections ( $H_T$ ), and the experimental/calculated HOF values of the reference compounds used in isodesmic reactions and other derivatives are given in Table S24 and S25. The usage of  $\text{HOF}_{\text{gas}}$  in the calculation of detonation properties slightly overestimates the values of detonation velocity and detonation pressure, and hence, the solid phase HOF ( $\text{HOF}_{\text{solid}}$ ) can effectively reduce the errors. The  $\text{HOF}_{\text{solid}}$  is calculated as the difference between  $\text{HOF}_{\text{gas}}$  and heat of sublimation ( $\text{HOF}_{\text{sub}}$ ) as,

$$\text{HOF}_{\text{solid}} = \text{HOF}_{\text{gas}} - \text{HOF}_{\text{sub}} \quad (1)$$

$\text{HOF}_{\text{sub}}$  depend on the molecular surface properties and calculated using equation (2) proposed by Politzer et al.,<sup>2</sup>

$$\text{HOF}_{\text{sub}} = 4.4307 \times 10^{-4} A^2 + 2.0599 (v \sigma_{\text{tot}}^2)^{0.5} - 2.4825 \quad (2)$$

where  $A$  represent the surface area of the 0.001 electrons/bohr<sup>3</sup> isosurface of electronic density,  $v$  denotes the degree of balance between the positive and negative surface potentials, and  $\sigma_{\text{tot}}^2$  is the electrostatic potential variance. The molecular surface properties (see Table S26) were obtained using the Multiwfn program.<sup>3</sup> The gas-phase heats of formation ( $\text{HOF}_{\text{gas}}$ ) of nitrate, perchlorate, and azide anions were calculated by G4 theory. The  $\text{HOF}_{\text{gas}}$  of picrate anion was obtained from previous reports.<sup>4</sup> the HOF of energetic salts were predicted using Born–Haber cycle (Figure S45) and can be simplified by the equation (3),

$$\text{HOF (salt, 298 K)} = \text{HOF (cation, 298 K)} + \text{HOF (anion, 298 K)} - H_L \quad (3)$$

in above equation,  $H_L$  is the lattice energy of the salts (see Table S27), which can be predicted by using the formula proposed by Jenkins et al.<sup>5</sup>

$$H_L = U_{\text{POT}} + [p(\frac{n_M}{2} - 2) + q(\frac{n_X}{2} - 2)]RT \quad (4)$$

The nature of the cation  $M_p^+$  and anion  $X_q^-$  decide  $n_M$  and  $n_X$  values, respectively and are equal to three for monoatomic ions, five for linear polyatomic ions, and six for nonlinear polyatomic ions.  $U_{\text{POT}}$  is the lattice potential energy, calculated using the density ( $\rho$  in  $\text{g/cm}^3$ ) and the chemical formula mass ( $M$  in  $\text{g/mol}$ ) of the ionic salt by the formula given in the following equation:

$$U_{\text{POT}} = 1981.2(\frac{\rho}{M})^{1/3} + 103.8 \quad (5)$$

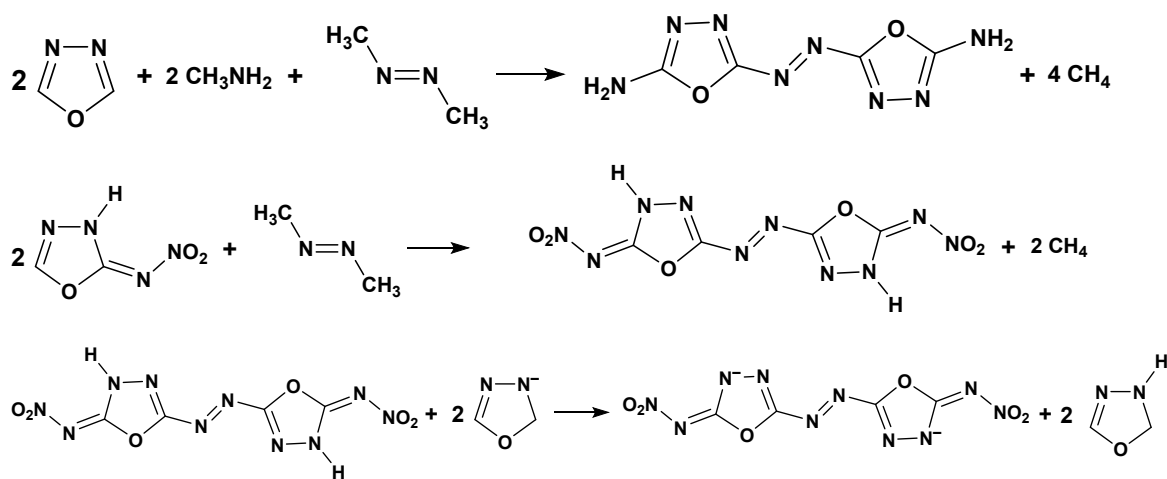

**Fig**

**ure S44.** Designed isodesmic reactions for the prediction of  $\text{HOF}_{\text{gas}}$  of compound **4**, **5**, and anion of compound **5**.

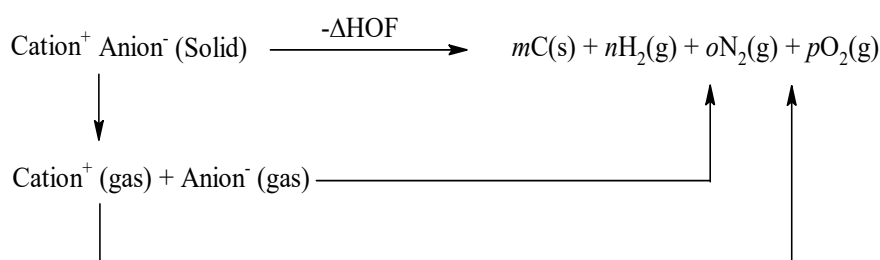

**Figure S45.** Born-Haber cycle for the formation of energetic salts.

**Table S24.** Calculated total energies at 298K ( $E_0$ ), zero point energies (ZPE), and thermal corrections ( $H_T$ ) and experimental  $\text{HOF}_{\text{gas}}$  of reference compounds used isodesmic reaction at the B3PW91/6-31G(d,p) level.

| Compd.                                                                             | $E_0$ (a.u.) | ZPE (au) | $H_T$ (au) | $\text{HOF}_{\text{gas}}$ (kJ/mol) |
|------------------------------------------------------------------------------------|--------------|----------|------------|------------------------------------|
| $\text{CH}_3\text{N}=\text{NCH}_3$                                                 | -189.119066  | 0.0847   | 0.006      | 152.66                             |
| $\text{CH}_3\text{NO}_2$                                                           | -244.866526  | 0.0502   | 0.0053     | -81                                |
| 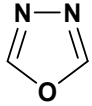  | -261.945502  | 0.0468   | 0.0043     | 63.6                               |
| $\text{CH}_3\text{NH}_2$                                                           | -95.759911   | 0.0644   | 0.0043     | -23.5                              |
| $\text{CH}_4$                                                                      | -40.459807   | 0.045    | 0.0039     | -74.8                              |
|   | -263.115665  | 0.0702   | 0.0052     | 50.94                              |
|   | -262.507656  | 0.0535   | 0.0052     | 65.84                              |
|  | -521.666459  | 0.0671   | 0.0076     | 111.88                             |

<sup>a</sup>Calculated using G4 method.

**Table S25.** Calculated total energies at 298K ( $E_0$ ), zero point energies (ZPE), and thermal corrections ( $H_T$ ) and experimental  $\text{HOF}_{\text{gas}}$  of target compounds at the B3PW91/6-31G(d,p) level.

| Compd.                                                                              | $E_0$ (a.u.) | ZPE (au) | $H_T$ (au) |
|-------------------------------------------------------------------------------------|--------------|----------|------------|
| 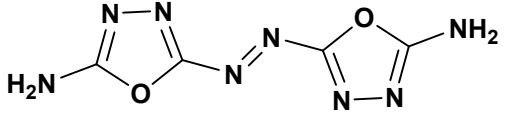 | -742.773222  | 0.1151   | 0.0119     |
|  | -1151.541143 | 0.1226   | 0.0167     |

**Table S26.** Calculated molecular surface properties and heat of sublimation of target compounds.

| Compd.                                                                            | Surface area (Å <sup>2</sup> ) | Volume (Å <sup>3</sup> ) | $\sigma_{tot}^2$ (kcal/mol) <sup>2</sup> | v      | HOF <sub>Sublimation</sub> (kJ/mol) |
|-----------------------------------------------------------------------------------|--------------------------------|--------------------------|------------------------------------------|--------|-------------------------------------|
| 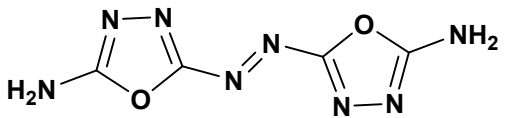 | 206.12                         | 193.30                   | 457.37                                   | 0.2372 | 131.84                              |
|  | 263.67                         | 252.54                   | 357.77                                   | 0.1747 | 144.73                              |

**Table S27.** Energy content of salts **6-8**.

| Salt | HOF <sub>c</sub> <sup>a</sup> | HOF <sub>a</sub> <sup>b</sup> | U <sub>Pot</sub> <sup>c</sup> | H <sub>L</sub> <sup>d</sup> | HOF <sub>salt</sub> <sup>e</sup> |
|------|-------------------------------|-------------------------------|-------------------------------|-----------------------------|----------------------------------|
| 6    | 769.5                         | 179.45                        | 1285.29                       | 1297.68                     | 420.8                            |
| 7    | 1112.0                        | 179.45                        | 1042.02                       | 1054.41                     | 1349.0                           |
| 8    | 671.7                         | 179.45                        | 1148.05                       | 1160.44                     | 362.4                            |

<sup>a</sup>Heat of formation of cation (kJ mol<sup>-1</sup>). <sup>b</sup>Heat of formation of anion (kJ mol<sup>-1</sup>). <sup>c</sup>Lattice potential energy (kJ mol<sup>-1</sup>). <sup>d</sup>Lattice energy (kJ mol<sup>-1</sup>). <sup>e</sup>Heat of formation of salt (kJ mol<sup>-1</sup>).

In energetic materials, generally, C–NO<sub>2</sub>, N–NO<sub>2</sub> and O–NO<sub>2</sub> are the weakest bond which easily ruptures on applying external stimuli. Hence, we have calculated the bond dissociation energy (BDE) of longest C–NO<sub>2</sub>, N–NO<sub>2</sub> or O–NO<sub>2</sub> bond using following equation (6) at B3PW91/6-31G(d,p) level,

$$BDE = [E_{R1} + E_{R2}] - E_{R1-R2} \quad (6)$$

where E<sub>R1-R2</sub>, E<sub>R1</sub> and E<sub>R2</sub> are the total energies with zero point energy correction of the precursor and the corresponding radicals produced by bond dissociation (see Table S25). The calculated bond dissociation energies of N–NO<sub>2</sub> bond in compound **5** and ICM-101 are shown in Figures S46 and S47.

**Table S28.** Calculated total energies (E<sub>0</sub>) of R–NO<sub>2</sub>, R, and NO<sub>2</sub> at the B3PW91/6-31G(d,p) level, used in the prediction of bond dissociation energies.

| Compd. | E <sub>0</sub> (a.u.) |             |                 |
|--------|-----------------------|-------------|-----------------|
|        | R–NO <sub>2</sub>     | R           | NO <sub>2</sub> |
| 5      | -1151.541143          | -946.482720 | -204.982012     |

|         |              |             |             |
|---------|--------------|-------------|-------------|
| ICM-101 | -1042.153955 | -837.096414 | -204.982012 |
|---------|--------------|-------------|-------------|

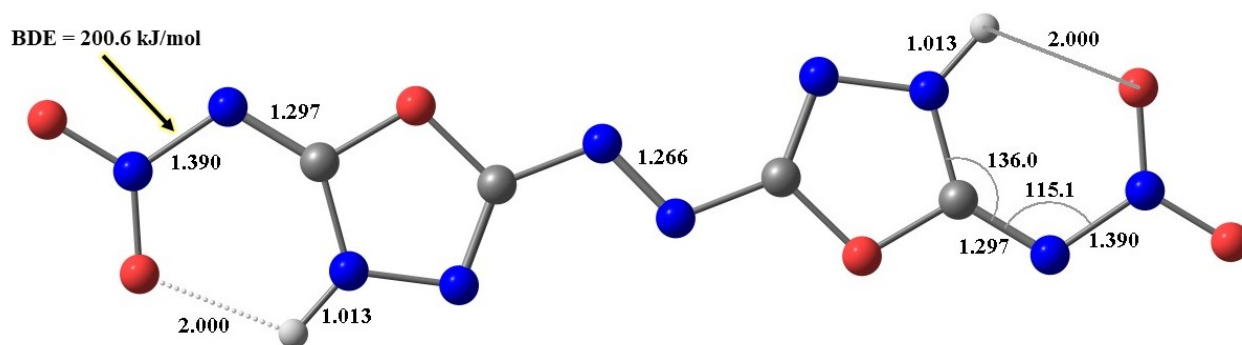

**Figure S46.** Selective bond lengths (Å), angles (°), and computed bond dissociation energy of N-NO<sub>2</sub> bond in compound **5**.

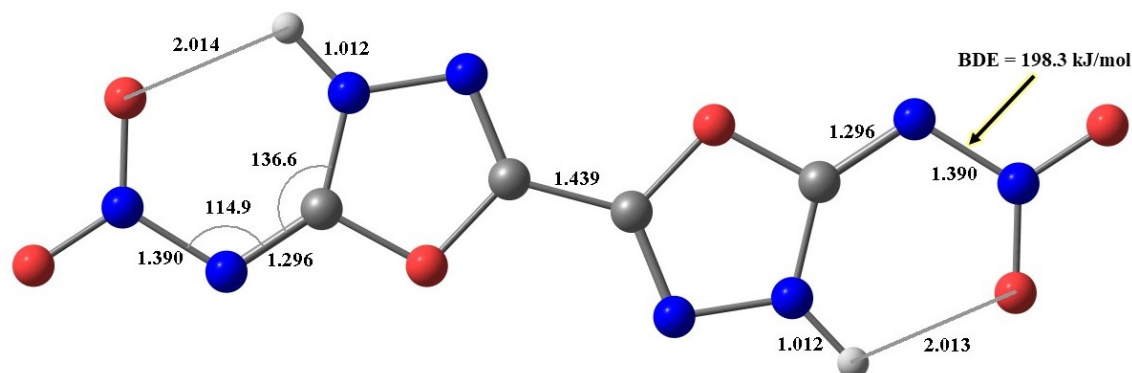

**Figure S47.** Selective bond lengths (Å), angles (°), and computed bond dissociation energy of N-NO<sub>2</sub> bond in compound ICM-101.

The relative stabilities of the geometrical isomers of compound **5** have been studied by DFT calculations.

Figures S48 and S49 represents the optimized structures of 5a and 5b isomers. As seen in Figure S49, the N-NO<sub>2</sub> group in these isomers was oriented to maximize internal hydrogen bonding and lowers the total energy. Compound 5b forms a stable six membered H-bonded ring, which is absent in 5a.

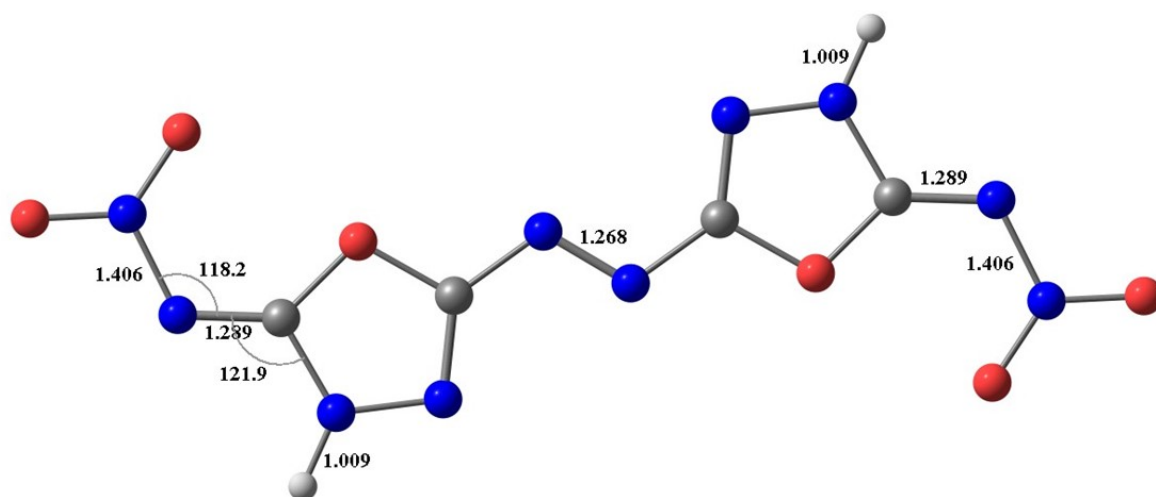

**Energy: -1151.5231 Hartree (C1)**

**Figure S48.** Optimized structure of compound 5 (named as 5a) where N-NO<sub>2</sub> group and N-H are away from each other.

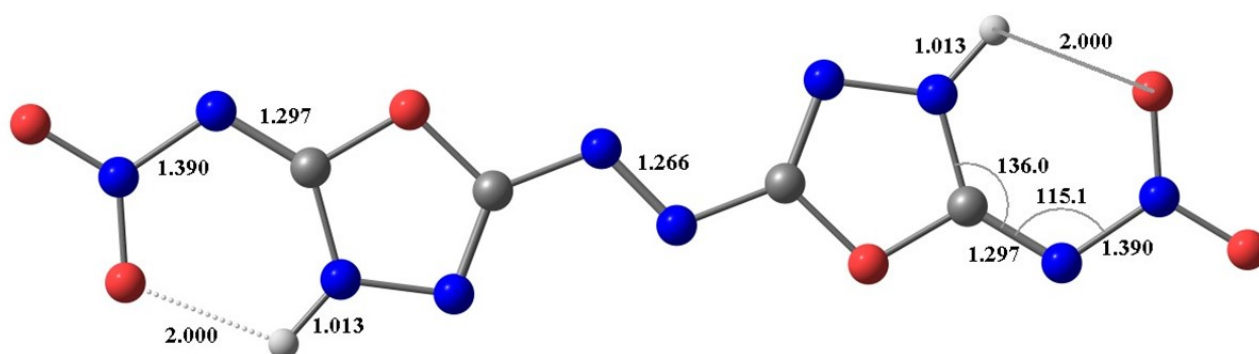

**Energy: -1151.5411 Hartree (C2)**

**Figure S49.** Optimized structure of compound 5 (named as 5b) where N-NO<sub>2</sub> group and N-H are closer to each other.

**Table S29.** DSC data of compound **7** at various heating rates (Kissinger method).

| Compd. | $\beta$ (°C) | $T_m$ (K) | $T_m^2$  | $1/T_m$ | $\beta/T_m^2$           | $-\ln(\beta/T_m^2)$ | R | Activation energy (kJ/mol) |
|--------|--------------|-----------|----------|---------|-------------------------|---------------------|---|----------------------------|
| 7      | 5            | 514.2     | 264350.2 | 0.00194 | $1.8914 \times 10^{-5}$ | -10.88              | 1 | 225.92                     |
|        | 10           | 520.8     | 271180.6 | 0.00192 | $3.6875 \times 10^{-5}$ | -10.21              |   |                            |
|        | 15           | 524.7     | 275257.6 | 0.00191 | $5.4494 \times 10^{-5}$ | -9.82               |   |                            |

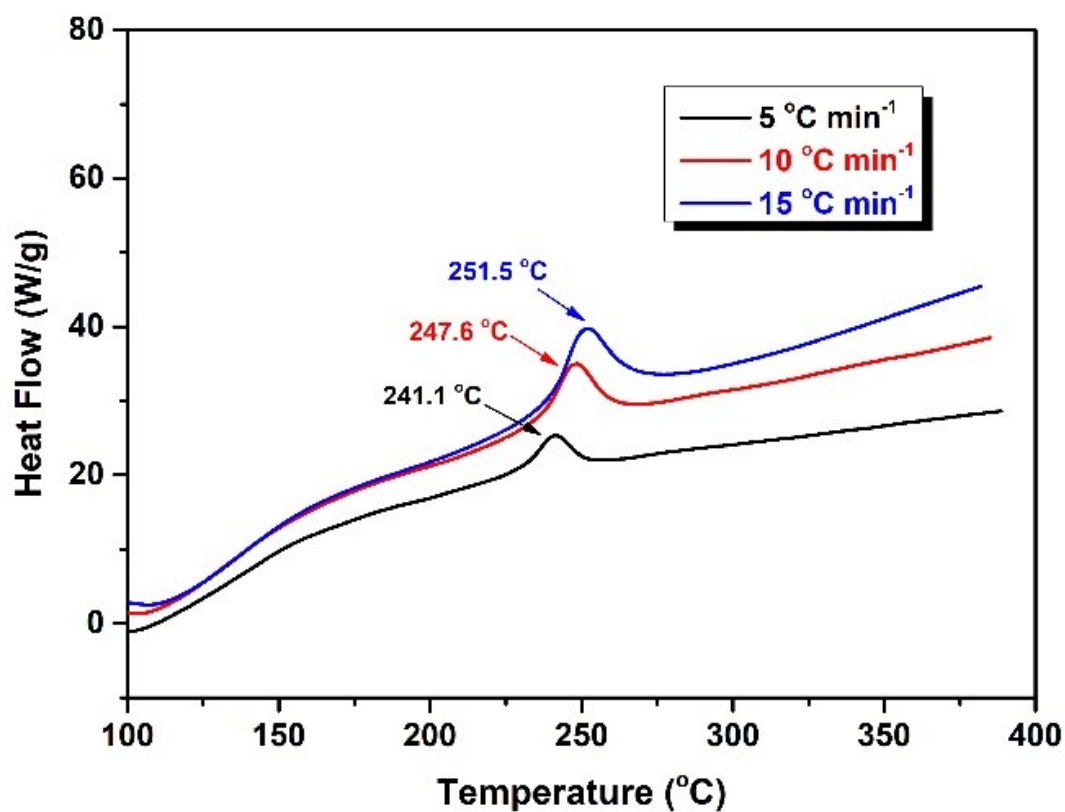

**Figure S50.** DSC curves of **7** at different heating rates.



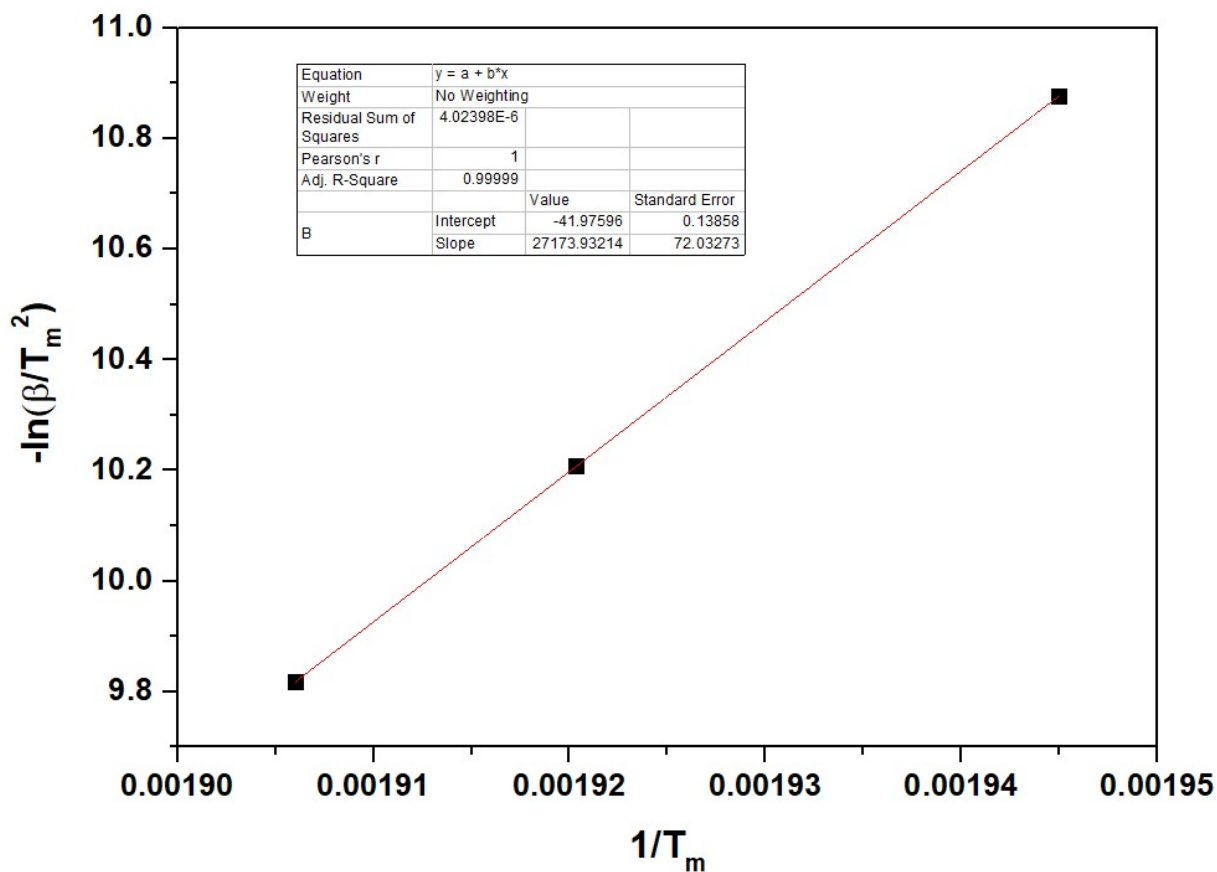

Figure S51. A plot of  $1/T_m$  vs  $-\ln(\beta/T_m^2)$  (Kissinger method) for compound 7.

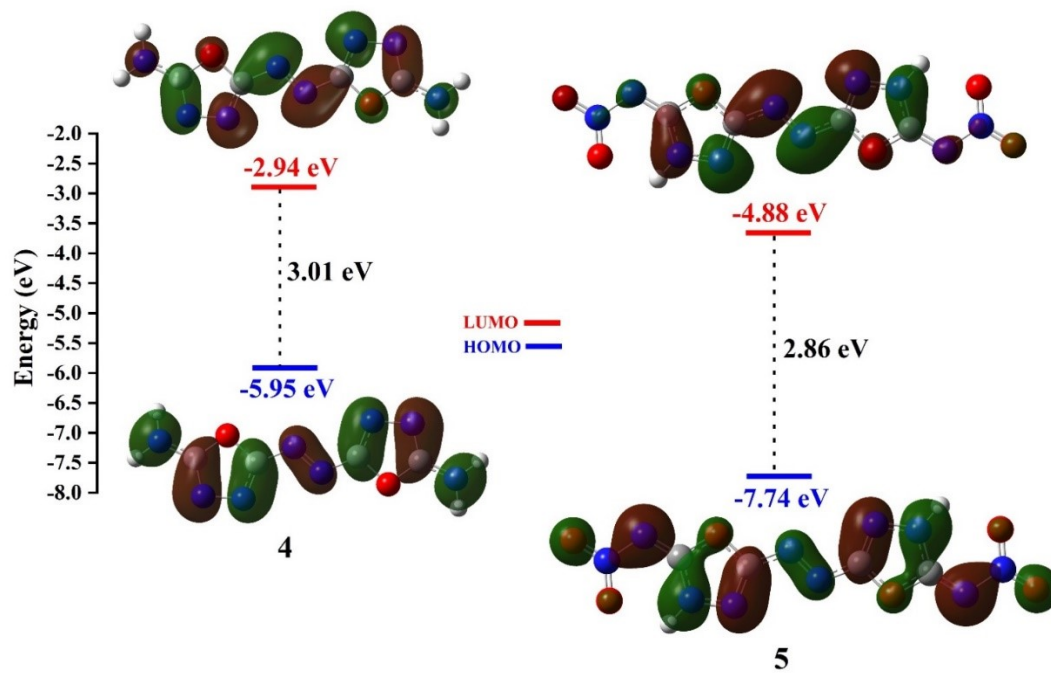

Fig. S52. Contour plots of the frontier orbitals of compounds 4 and 5.

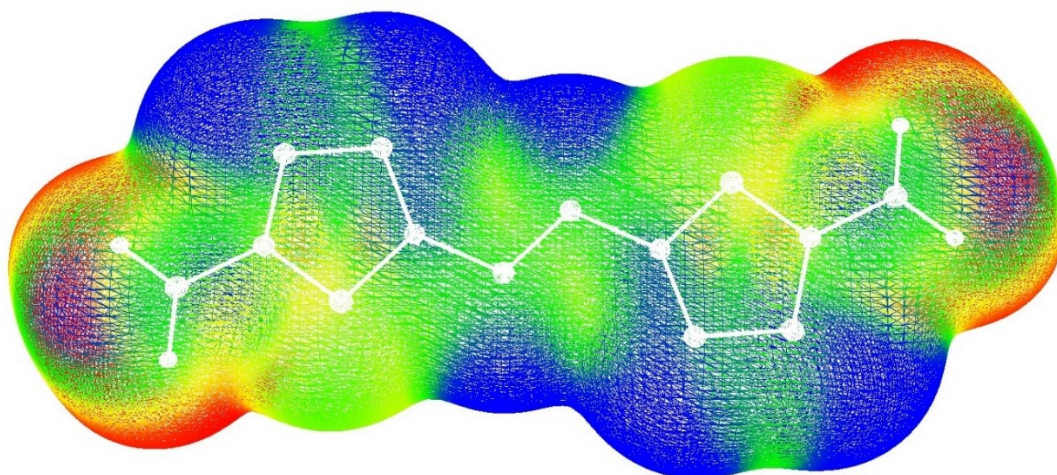

**Figure S53.** The electrostatic potentials for the 0.001 electron/bohr<sup>3</sup> isosurfaces of electron density evaluated at the B3LYP level of theory for compound **4**. (Color ranges for isosurface in kcal/mol, are: red > 15, yellow > 13, green > 11, blue < 11).

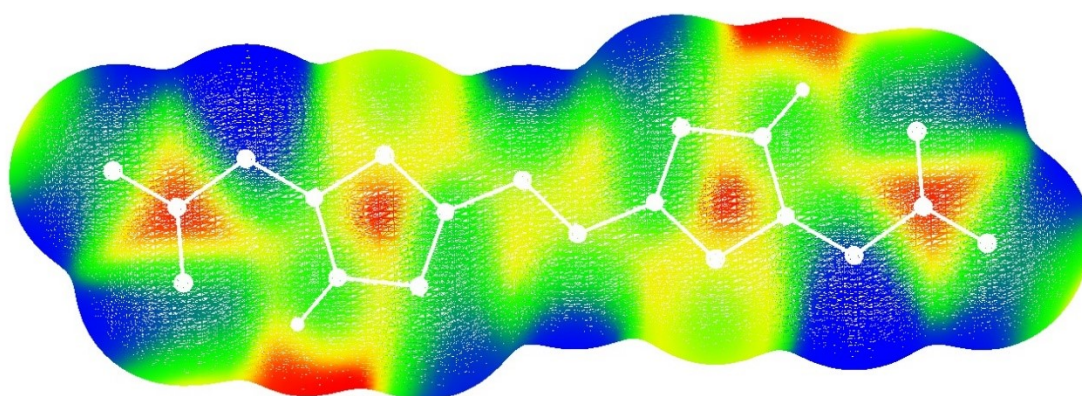

**Figure S54.** The electrostatic potentials for the 0.001 electron/bohr<sup>3</sup> isosurfaces of electron density evaluated at the B3LYP level of theory for compound **5**. (Color ranges for isosurface in kcal/mol, are: red > 16, yellow > 14, green > 12, blue < 12).

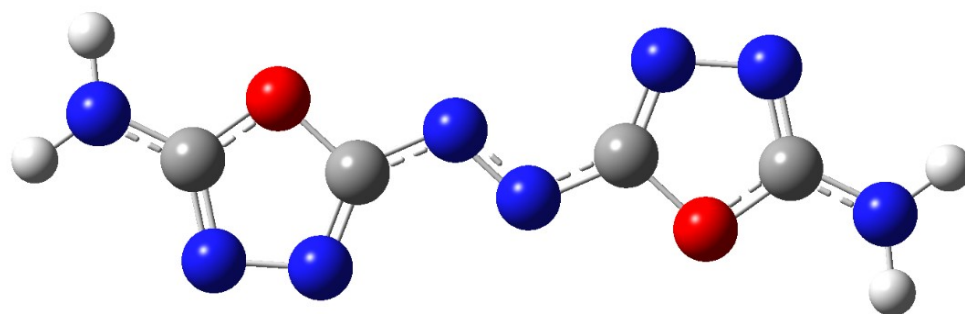

**Figure S55.** Optimized structure of compound **4** and its Cartesian coordinates at B3PW91/6-31G(d,p) level of theory

|   |              |              |              |
|---|--------------|--------------|--------------|
| 6 | 3.826897000  | -0.056504000 | -0.000036000 |
| 8 | 2.736525000  | -0.831446000 | -0.000219000 |
| 7 | 3.558149000  | 1.233040000  | 0.000268000  |
| 6 | 1.719931000  | 0.107432000  | -0.000064000 |
| 7 | 2.193962000  | 1.323528000  | 0.000178000  |
| 7 | 0.467996000  | -0.431553000 | -0.000179000 |
| 7 | -0.467996000 | 0.431552000  | -0.000119000 |
| 6 | -1.719931000 | -0.107432000 | -0.000075000 |
| 7 | -2.193962000 | -1.323529000 | 0.000105000  |
| 8 | -2.736525000 | 0.831446000  | 0.000126000  |
| 7 | -3.558149000 | -1.233040000 | 0.000074000  |
| 6 | -3.826897000 | 0.056504000  | 0.000027000  |
| 7 | -5.035822000 | 0.639026000  | -0.000233000 |
| 7 | 5.035823000  | -0.639026000 | -0.000506000 |
| 1 | -5.851083000 | 0.051961000  | 0.000655000  |
| 1 | -5.127569000 | 1.638772000  | 0.001092000  |
| 1 | 5.851082000  | -0.051961000 | 0.001301000  |
| 1 | 5.127568000  | -1.638772000 | 0.001462000  |

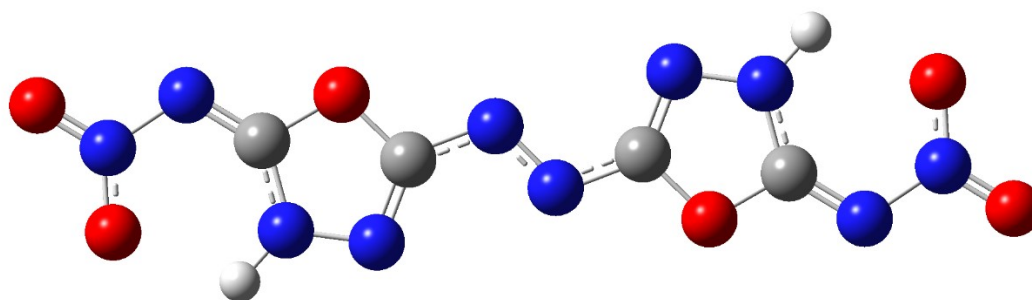

**Figure S56.** Optimized structure of compound **5** and its Cartesian coordinates at B3PW91/6-31G(d,p) level of theory.

|   |              |              |              |
|---|--------------|--------------|--------------|
| 6 | -3.874739000 | 0.237960000  | 0.000110000  |
| 8 | -2.703917000 | 0.914237000  | 0.000247000  |
| 7 | -3.523128000 | -1.077213000 | -0.000146000 |
| 6 | -1.724000000 | -0.039013000 | 0.000067000  |

|   |              |              |              |
|---|--------------|--------------|--------------|
| 7 | -2.187020000 | -1.252707000 | -0.000132000 |
| 7 | -0.443438000 | 0.452068000  | 0.000357000  |
| 7 | 0.443429000  | -0.451965000 | -0.000343000 |
| 6 | 1.723990000  | 0.039109000  | -0.000150000 |
| 7 | 2.187064000  | 1.252774000  | -0.000332000 |
| 8 | 2.703895000  | -0.914169000 | -0.000055000 |
| 7 | 3.523151000  | 1.077258000  | -0.000331000 |
| 6 | 3.874733000  | -0.237940000 | -0.000115000 |
| 7 | 4.986018000  | -0.906826000 | 0.000010000  |
| 7 | -4.986044000 | 0.906790000  | 0.000265000  |
| 1 | -4.199387000 | -1.831453000 | -0.000148000 |
| 1 | 4.199349000  | 1.831534000  | -0.000373000 |
| 7 | 6.140297000  | -0.132937000 | 0.000170000  |
| 8 | 6.063815000  | 1.107497000  | -0.000108000 |
| 8 | 7.177787000  | -0.757545000 | 0.000517000  |
| 7 | -6.140300000 | 0.132846000  | 0.000033000  |
| 8 | -7.177821000 | 0.757404000  | 0.000052000  |
| 8 | -6.063771000 | -1.107597000 | -0.000129000 |

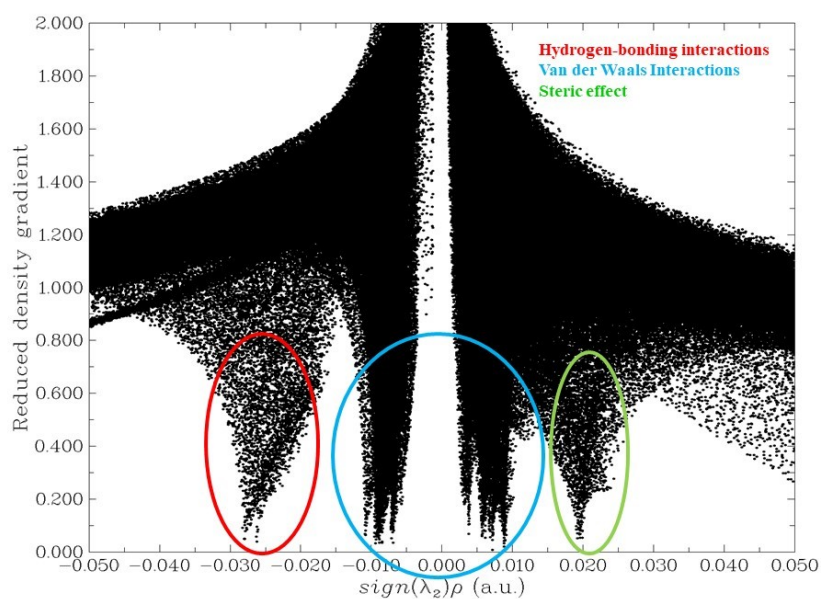

**Figure S57.** Scatter graph ( $\text{sign}(\lambda_2)\rho$  vs RDG functions) for compound **5**.



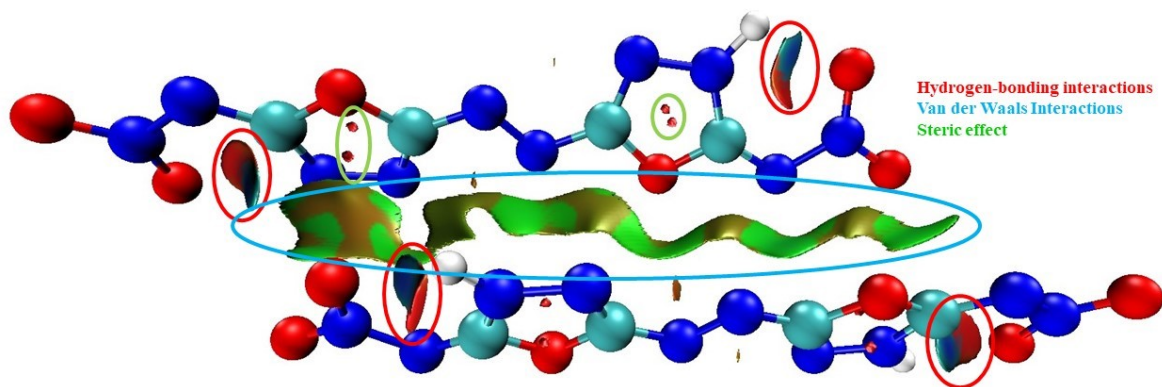

**Figure S58.** Reduced density gradient isosurface for compound **5**.

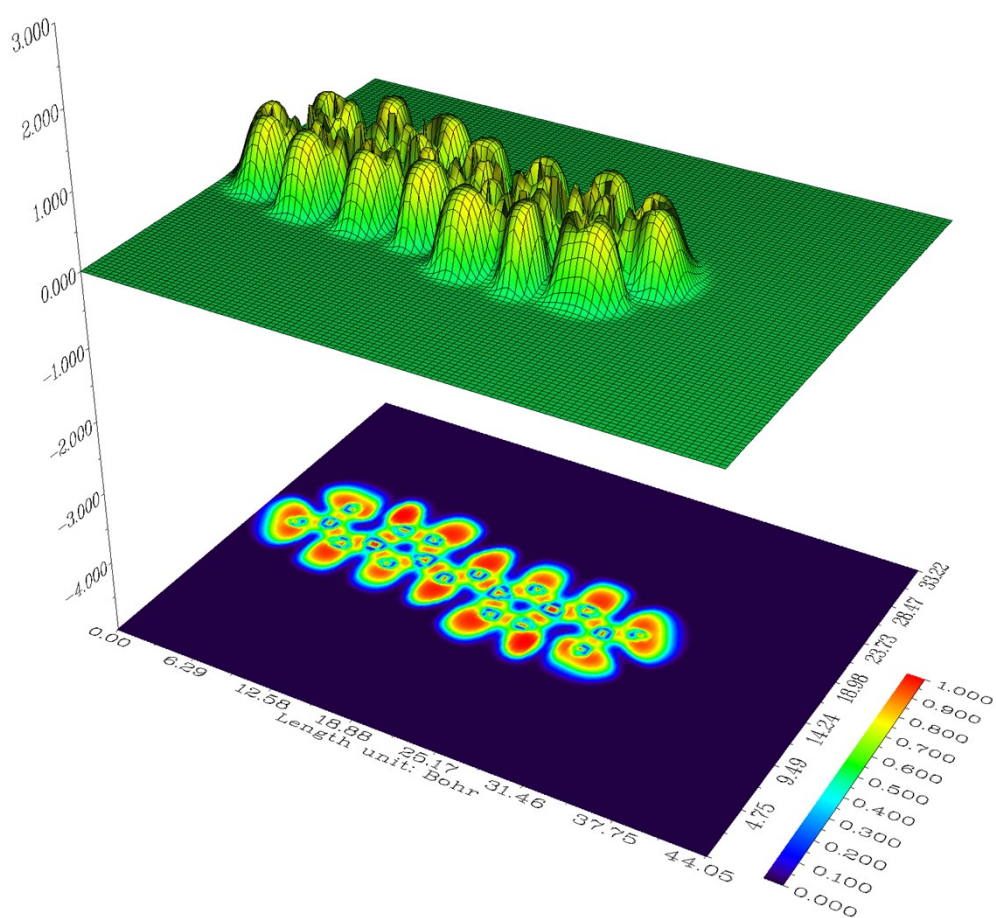

**Figure S59.** Surface map with projection effect of ELF of compound **5**.

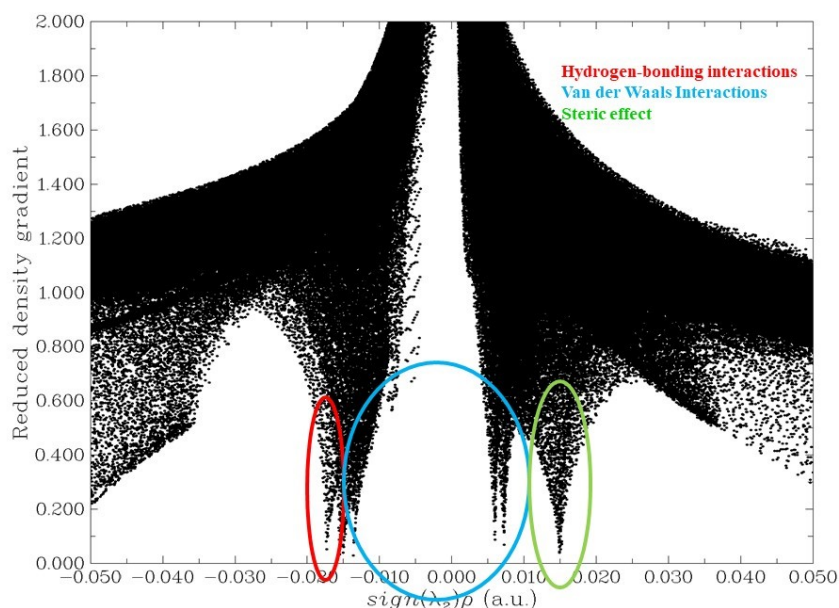

**Figure S60.** Scatter graph ( $sign(\lambda_2)\rho$  vs RDG functions) for salt **6**.

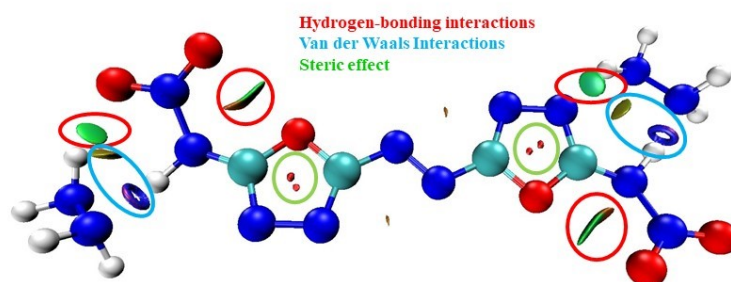

**Figure S61.** Reduced density gradient isosurface for salt **6**.

## References

1. Gaussian 09, Revision E.01, M. J. Frisch, G. W. Trucks, H. B. Schlegel, G. E. Scuseria, M. A. Robb, J. R. Cheeseman, G. Scalmani, V. Barone, B. Mennucci, G. A. Petersson, H. Nakatsuji, M. Caricato, X. Li, H. P. Hratchian, A. F. Izmaylov, J. Bloino, G. Zheng, J. L. Sonnenberg, M. Hada, M. Ehara, K. Toyota, R. Fukuda, J. Hasegawa, M. Ishida, T. Nakajima, Y. Honda, O. Kitao, H. Nakai, T. Vreven, Jr. J. A. Montgomery, J. E. Peralta, F. Ogliaro, M. Bearpark, J. J. Heyd, E. Brothers, K. N. Kudin, V. N. Staroverov, R. Kobayashi, J. Normand, K. Raghavachari, A. Rendell, J. C. Burant, S. S. Iyengar, J. Tomasi, M. Cossi, N. Rega, J. M. Millam, M. Klene, J. E. Knox, J. B. Cross, V. Bakken, C. Adamo, J. Jaramillo, R. Gomperts, R. E. Stratmann, O. Yazyev, A. J. Austin, R. Cammi, C. Pomelli, J. W. Ochterski, R. L. Martin, K. Morokuma, V. G. Zakrzewski, G. A. Voth, P. Salvador, J. J. Dannenberg, S. Dapprich, A. D. Daniels, O. Farkas, J. B. Foresman, J. V. Ortiz, J. Cioslowski, D. J. Fox, *Gaussian, Inc.*, Wallingford CT, **2013**.
2. P. Politzer, Y. Ma, P. Lane, M. C. Concha, *Int J Quant Chem*, **105**, 341-347 (2005).
3. T. Lu, F. Chen, *J Comput Chem*, **3**, 580-592 (2012).

4. A. Devi, S. Dharavath, V. D. Ghule, *ChemistrySelect.*, **3**, 4501–4504 (2018).
5. H. D. B. Jenkins, D. Tudela, L. Glasser, Lattice Potential Energy Estimation for Complex Ionic Salts from Density Measurements, *Inorg. Chem.*, **41**, 2364 (2002).
6. Gaussian 09, Revision E.01, M. J. Frisch, G. W. Trucks, H. B. Schlegel, G. E. Scuseria, M. A. Robb, J. R. Cheeseman, G. Scalmani, V. Barone, B. Mennucci, G. A. Petersson, H. Nakatsuji, M. Caricato, X. Li, H. P. Hratchian, A. F. Izmaylov, J. Bloino, G. Zheng, J. L. Sonnenberg, M. Hada, M. Ehara, K. Toyota, R. Fukuda, J. Hasegawa, M. Ishida, T. Nakajima, Y. Honda, O. Kitao, H. Nakai, T. Vreven, Jr. J. A. Montgomery, J. E. Peralta, F. Ogliaro, M. Bearpark, J. J. Heyd, E. Brothers, K. N. Kudin, V. N. Staroverov, R. Kobayashi, J. Normand, K. Raghavachari, A. Rendell, J. C. Burant, S. S. Iyengar, J. Tomasi, M. Cossi, N. Rega, J. M. Millam, M. Klene, J. E. Knox, J. B. Cross, V. Bakken, C. Adamo, J. Jaramillo, R. Gomperts, R. E. Stratmann, O. Yazyev, A. J. Austin, R. Cammi, C. Pomelli, J. W. Ochterski, R. L. Martin, K. Morokuma, V. G. Zakrzewski, G. A. Voth, P. Salvador, J. J. Dannenberg, S. Dapprich, A. D. Daniels, O. Farkas, J. B. Foresman, J. V. Ortiz, J. Cioslowski, D. J. Fox, *Gaussian, Inc.*, Wallingford CT, 2013.
7. P. Politzer, Y. Ma, P. Lane, M. C. Concha, *Int J Quant Chem*, **105**, 341-347 (2005).
8. T. Lu, F. Chen, *J Comput Chem*, **3**, 580–592 (2012).
9. A. Devi, S. Dharavath, V. D. Ghule, *ChemistrySelect.*, **3**, 4501–4504 (2018).
10. H. D. B. Jenkins, D. Tudela, L. Glasser, Lattice Potential Energy Estimation for Complex Ionic Salts from Density Measurements, *Inorg. Chem.*, **41**, 2364 (2002).
